# Supplementary material for: Direct utilization of long-chain fatty acid for methane production by thermophilic Archaeoglobi
Source: Research Square preprint supplement (doi:10.21203/rs.3.rs-7873196/v1), 2025-10-24
Supplement: Supplementary file 1 [file 4a5fe2c9fbc59f5320e48ec1.pdf]

**Supplementary Information**  
**Direct utilization of long-chain fatty acid for methane production by**  
**thermophilic *Archaeoglobi***

Tiantian Yu<sup>1\*</sup>, Shujian Yuan<sup>1</sup>, Yinzhaoh Wang<sup>2</sup>, Fengping Wang<sup>1\*</sup>

<sup>1</sup> State Key Laboratory of Submarine Geoscience; Key Laboratory of Polar Ecosystem and Climate Change, Ministry of Education; Shanghai Key Laboratory of Polar Life and Environment Sciences; and School of Oceanography, Shanghai Jiao Tong University, Shanghai, China;

<sup>2</sup> State Key Laboratory of Microbial Metabolism, School of Life Sciences and Biotechnology, Shanghai Jiao Tong University, 200240 Shanghai, China.

\*To whom correspondence should be addressed. E-mail: [fengpingw@sjtu.edu.cn](mailto:fengpingw@sjtu.edu.cn); [yutiantian@sjtu.edu.cn](mailto:yutiantian@sjtu.edu.cn).

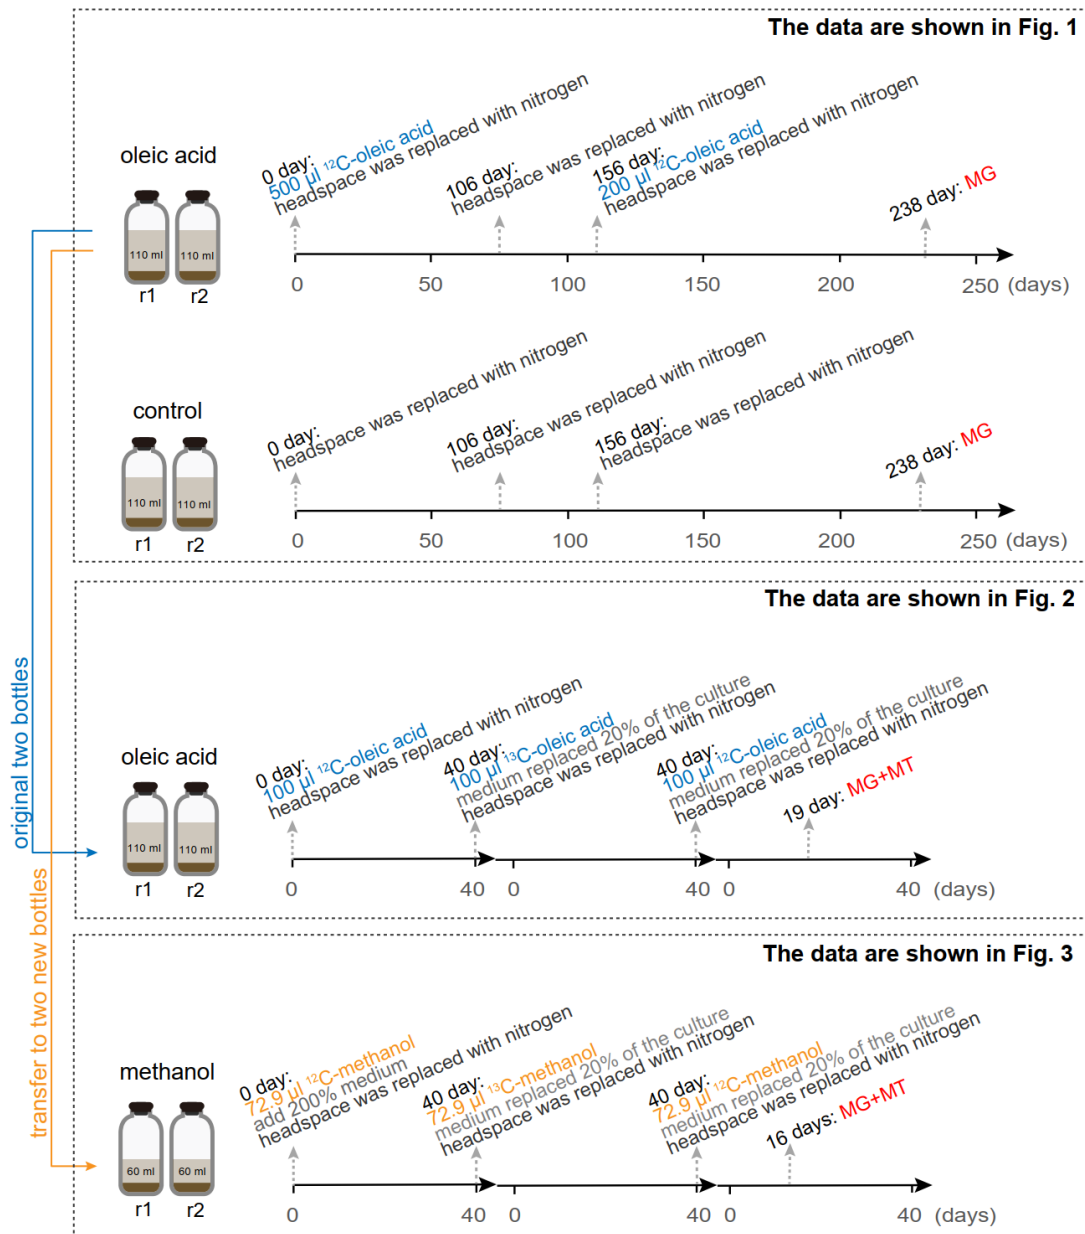

**Supplementary Figure 1 Scheme of incubation experiments.** r1 and r2 represent two replicates; MG and MT represent metagenomic and metatranscriptomic sequencing respectively; details see Materials and Methods.

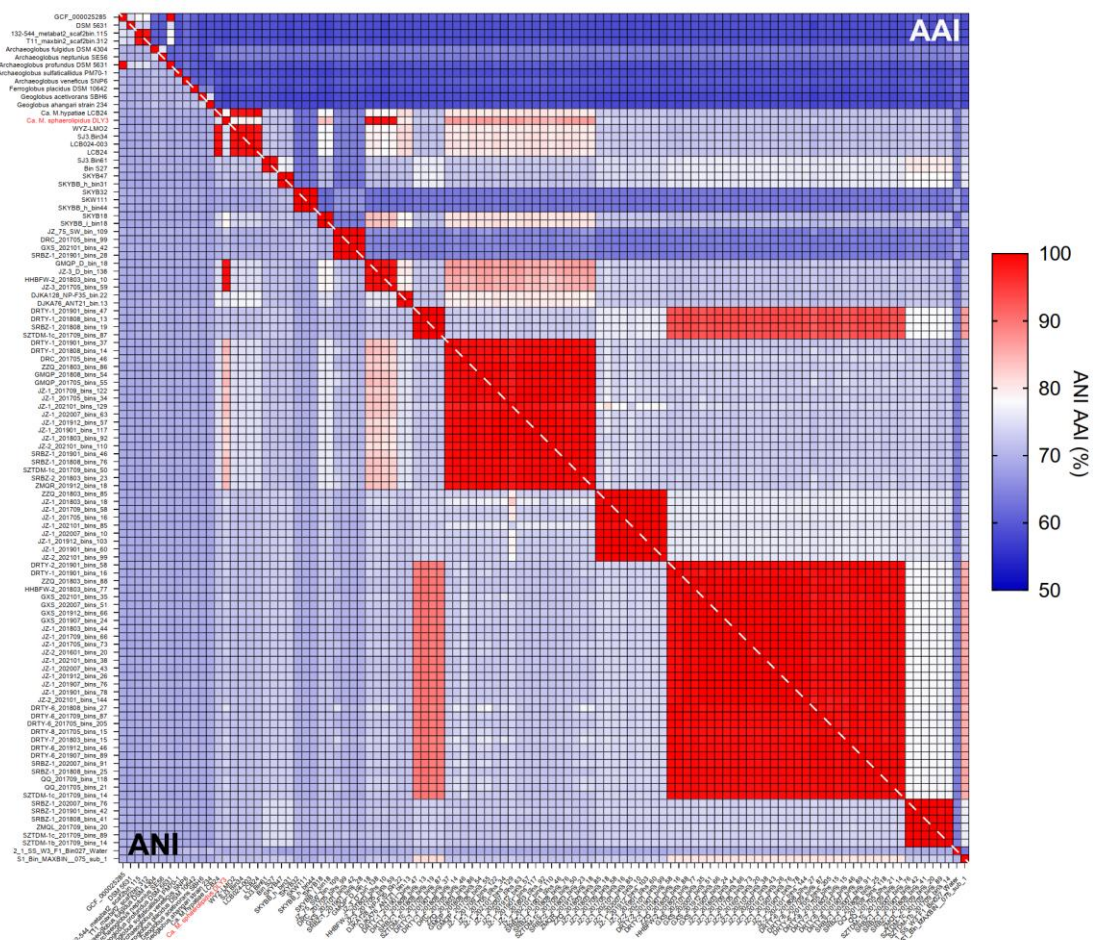

**Supplementary Figure 2 ANI and AAI analysis of reference *Archaeoglobales* genomes.** AAI and ANI values are provided in Supplementary Table 3.

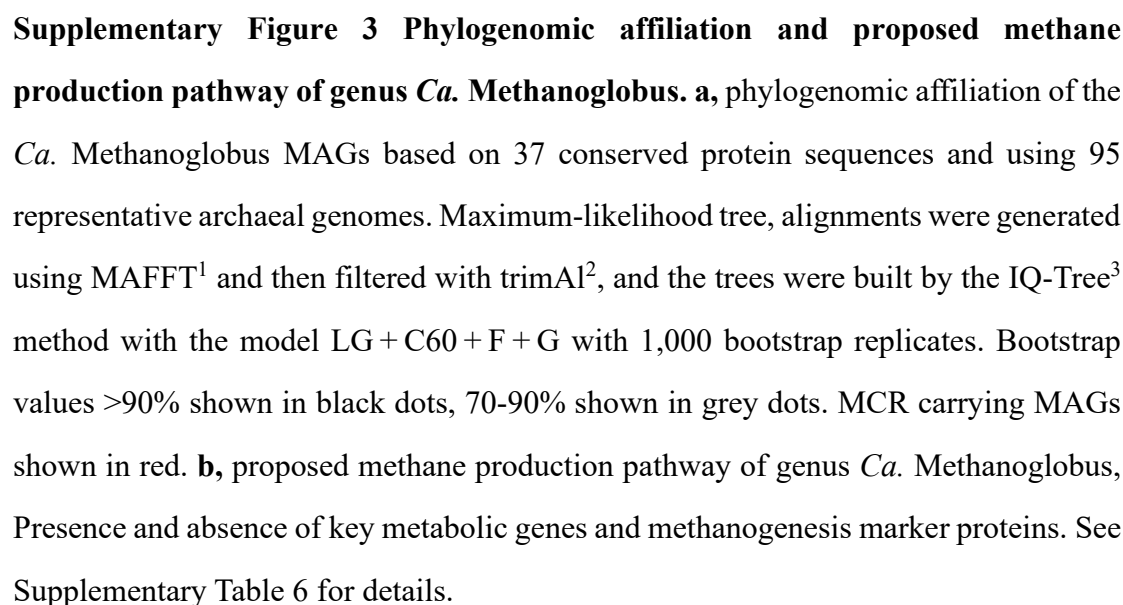

**Supplementary Figure 3 Phylogenomic affiliation and proposed methane production pathway of genus *Ca. Methanoglobus*.** **a**, phylogenomic affiliation of the *Ca. Methanoglobus* MAGs based on 37 conserved protein sequences and using 95 representative archaeal genomes. Maximum-likelihood tree, alignments were generated using MAFFT<sup>1</sup> and then filtered with trimAl<sup>2</sup>, and the trees were built by the IQ-Tree<sup>3</sup> method with the model LG + C60 + F + G with 1,000 bootstrap replicates. Bootstrap values >90% shown in black dots, 70-90% shown in grey dots. MCR carrying MAGs shown in red. **b**, proposed methane production pathway of genus *Ca. Methanoglobus*, Presence and absence of key metabolic genes and methanogenesis marker proteins. See Supplementary Table 6 for details.

### Supplementary References

1. Katoh, K. & Standley, D. M. MAFFT multiple sequence alignment software version 7: improvements in performance and usability. *Mol. Biol. Evol.* **30**, 772-80 (2013).
2. Capella-Gutiérrez, S. et al. trimAl: a tool for automated alignment trimming in large-scale phylogenetic analyses. *Bioinformatics* **25**, 1972-1973 (2009).
3. Nguyen, L. T. et al. IQ-TREE: a fast and effective stochastic algorithm for estimating maximum-likelihood phylogenies. *Mol. Biol. Evol.* **32**, 268-274 (2015).
