# Supplementary material for: Direct utilization of long-chain fatty acid for methane production by thermophilic Archaeoglobi
Source: Research Square preprint supplement (doi:10.21203/rs.3.rs-7873196/v1), 2025-10-24
Supplement: Supplementary file 1 [file 14448702ac66bdb441ff39fc.xlsx]

## Sheet: oleic acid-r1
Supplementary Table 5 Beta-oxidation gene expression in MAGs containing a complete beta-oxidation pathway from the oleic acid enrichment cultures.
bin id	gene abbrev.	#query_name	FPKM
6_001	acsl	k147_1761_25	45.6147
6_001	acsl	k147_21384_45	281.299
6_001	acsl	k147_1787_140	186.157
6_001	acsl
6_001	acadm	k147_20222_61	5647.38
6_001	acadm	k147_25946_143	350.412
6_001	acadm	k147_29933_49	619.748
6_001	acadm	k147_1761_29	48.1704
6_001	paaF	k147_29933_94	121.126
6_001	crt	k147_32481_10	833.955
6_001	crt	k147_1761_28	14.7787
6_001	fadB	k147_1787_60	675.488
6_001	fadB	k147_1787_145	118.419
6_001	fadB	k147_1787_134	196.883
6_001	fadB	k147_25946_22	1022.2
6_001	fadB	k147_15844_113	1634.43
6_001	fadB	k147_25946_16	20.4022
6_001	fadB	k147_15844_178	2155.76
6_001	fadA/acat	k147_25946_21	6853.28
6_001	fadA/acat	k147_25946_65	746.246
6_001	fadA/acat	k147_20222_62	979.814
6_001	fadA/acat	k147_1761_31	97.4527
6_001	fadA/acat	k147_1787_135	272.75
6_001	fadA/acat	k147_29933_40	128.454
6_008	acsl	k147_14777_33	0
6_008	acadm	k147_14777_27	7.81834
6_008	acadm	k147_14777_29	0
6_008	acadm	k147_29890_7	1.97395
6_008	acadm	k147_4993_3	5.60701
6_008	crt	k147_29890_9	3.40037
6_008	fadB	k147_14777_28	0
6_008	fadB	k147_14777_30	0
6_008	fadB	k147_14777_32	0
6_008	fadB	k147_32647_2	0
6_008	fadA/acat	k147_14777_31	0
6_008	fadA/acat	k147_32647_3	5.18537
6_008	fadA/acat	k147_32647_1	2.00038
6_008	fadA/acat	k147_13286_5	0

## Sheet: oleic acid-r2
bin id	gene abbrev.	#query_name	FPKM
7_001	acsl	k147_17830_140	743.033
7_001	acsl	k147_1474_45	742.791
7_001	acsl	k147_5547_15	30.1039
7_001	acsl	k147_1024_87	52.4661
7_001	acadm	k147_15806_143	553.443
7_001	acadm	k147_11548_61	7729.92
7_001	acadm	k147_1024_83	103.56
7_001	acadm	k147_8699_49	824.263
7_001	paaF	k147_8699_95	83.9749
7_001	crt	k147_5970_52	827.625
7_001	crt	k147_1024_84	56.6878
7_001	fadB	k147_8514_178	3545.74
7_001	fadB	k147_15806_16	54.0101
7_001	fadB	k147_15806_22	1371.83
7_001	fadB	k147_8514_113	3008.68
7_001	fadB	k147_17830_60	888.343
7_001	fadB	k147_17830_145	278.1
7_001	fadB	k147_17830_134	823.789
7_001	fadA/acat	k147_15806_21	10476
7_001	fadA/acat	k147_15806_65	1223.2
7_001	fadA/acat	k147_8699_40	268.791
7_001	fadA/acat	k147_17830_135	792.394
7_001	fadA/acat	k147_11548_62	1534.58
7_001	fadA/acat	k147_1024_81	102.921
7_019	acsl	k147_5057_2	0.703125
7_019	acadm	k147_1869_3	1.15962
7_019	acadm	k147_19873_1	2.90914
7_019	acadm	k147_2436_9	1.14399
7_019	acadm	k147_8503_3	0
7_019	crt	k147_18714_2	0
7_019	crt	k147_2436_7	4.00075
7_019	fadB	k147_1172_1	12.4172
7_019	fadB	k147_1869_2	0
7_019	fadB	k147_1869_4	0
7_019	fadB	k147_19920_1	0
7_019	fadB	k147_5057_1	0
7_019	fadA/acat	k147_1172_2	1.13633
7_019	fadA/acat	k147_12607_1	0
7_019	fadA/acat	k147_1869_5	4.55216
7_019	fadA/acat	k147_2436_10	0
7_024	acsl	k147_19830_2	0
7_024	acsl	k147_14398_1	0
7_024	acsl	k147_16941_2	0
7_024	acsl	k147_20335_2	0
7_024	acsl	k147_13381_1	0
7_024	acsl	k147_11621_1	1.07173
7_024	acsl	k147_21794_1	0
7_024	acadm	k147_18040_1	0
7_024	crt	k147_11750_2	0
7_024	fadB	k147_1594_1	0
7_024	fadB	k147_14833_1	0
7_024	fadB	k147_15376_2	0
7_024	fadA/acat	k147_6711_1	0
7_024	fadA/acat	k147_10363_2	5.58807
7_024	fadA/acat	k147_9554_1	1.4973
7_024	fadA/acat	k147_18554_2	0
7_024	fadA/acat	k147_8772_1	8.80777
7_024	fadA/acat	k147_8772_2	0
7_024	fadA/acat	k147_18281_2	0
7_024	fadA/acat	k147_8340_2	0
7_024	fadA/acat	k147_14833_2	0
7_024	fadA/acat	k147_6268_1	4.50532
7_024	fadA/acat	k147_7289_1	0
7_024	fadA/acat	k147_19554_2	4.83682
7_024	fadA/acat	k147_5479_3	0
