# Supplementary material for: Direct utilization of long-chain fatty acid for methane production by thermophilic Archaeoglobi
Source: Research Square preprint supplement (doi:10.21203/rs.3.rs-7873196/v1), 2025-10-24
Supplement: Supplementary file 2 [file 77b108f1e8fa77e957cd5bb2.xlsx]

## Sheet: gene expression
Supplementary Table 4 Corresponding gene expression in Ca. M. sphaerolipidus for beta-oxidation, methyltransferase, WLP, methanogenesis, energy metabolism, gluconeogenesis, pentose phosphate pathway and TCA cycle.
				oleic acid-r1		oleic acid-r2		methanol-r1		methanol-r2
Pathway	Abbrev.	Gene name	KEGG_ko	#query_name	FPKM	#query_name	FPKM	#query_name	FPKM	#query_name	FPKM
Beta_oxidation	acsl	long-chain_acyl-CoA_synthetase	K01897	k147_1761_25	45.6147	k147_17830_140	743.033	k147_46470_140	158.069	k147_43954_25	55.5159
Beta_oxidation	acsl	long-chain_acyl-CoA_synthetase	K01897	k147_21384_45	281.299	k147_1474_45	742.791	k147_55283_25	61.9662	k147_5486_140	162.625
Beta_oxidation	acsl	long-chain_acyl-CoA_synthetase	K01897	k147_1787_140	186.157	k147_5547_15	30.1039	k147_36620_45	545.607	k147_46031_45	497.509
Beta_oxidation	acsl	long-chain_acyl-CoA_synthetase	K01897			k147_1024_87	52.4661
Beta_oxidation	acadm	acyl-CoA_dehydrogenase	K00249	k147_20222_61	5647.38	k147_15806_143	553.443	k147_32363_143	346.223	k147_5617_143	347.992
Beta_oxidation	acadm	acyl-CoA_dehydrogenase	K00249	k147_25946_143	350.412	k147_11548_61	7729.92	k147_6810_49	793.062	k147_47739_61	3187.91
Beta_oxidation	acadm	acyl-CoA_dehydrogenase	K00249	k147_29933_49	619.748	k147_1024_83	103.56	k147_28185_61	2793.79	k147_43954_29	32.8676
Beta_oxidation	acadm	acyl-CoA_dehydrogenase	K00249	k147_1761_29	48.1704	k147_8699_49	824.263	k147_55283_29	31.6437	k147_2766_49	764.333
Beta_oxidation	paaF	enoyl-CoA_hydratase	K01692	k147_29933_94	121.126	k147_8699_95	83.9749	k147_6810_94	296.003	k147_2766_94	336.953
Beta_oxidation	crt	enoyl-CoA_hydratase	K01715	k147_32481_10	833.955	k147_5970_52	827.625	k147_29198_52	743.679	k147_787_52	752.355
Beta_oxidation	crt	enoyl-CoA_hydratase	K01715	k147_1761_28	14.7787	k147_1024_84	56.6878	k147_55283_28	12.5226	k147_43954_28	10.8053
Beta_oxidation	fadB	4-hydroxyacyl-CoA_dehydrogenase	K15016	k147_1787_60	675.488	k147_8514_178	3545.74	k147_2999_113	751.458	k147_5486_145	429.242
Beta_oxidation	fadB	4-hydroxyacyl-CoA_dehydrogenase	K15016	k147_1787_145	118.419	k147_15806_16	54.0101	k147_2999_178	2094.01	k147_48978_113	775.84
Beta_oxidation	fadB	4-hydroxyacyl-CoA_dehydrogenase	K15016	k147_1787_134	196.883	k147_15806_22	1371.83	k147_46470_145	390.678	k147_5486_134	71.4244
Beta_oxidation	fadB	4-hydroxyacyl-CoA_dehydrogenase	K15016	k147_25946_22	1022.2	k147_8514_113	3008.68	k147_46470_134	81.7934	k147_5617_22	241.04
Beta_oxidation	fadB	4-hydroxyacyl-CoA_dehydrogenase	K15016	k147_15844_113	1634.43	k147_17830_60	888.343	k147_32363_16	75.2237	k147_5617_16	58.0392
Beta_oxidation	fadB	4-hydroxyacyl-CoA_dehydrogenase	K15016	k147_25946_16	20.4022	k147_17830_145	278.1	k147_46470_60	644.762	k147_5486_60	567.423
Beta_oxidation	fadB	4-hydroxyacyl-CoA_dehydrogenase	K15016	k147_15844_178	2155.76	k147_17830_134	823.789	k147_32363_22	303.835	k147_48978_178	2163.75
Beta_oxidation	fadA/acat	acetyl-CoA_acetyltransferase	K00632/K00626	k147_25946_21	6853.28	k147_15806_21	10476	k147_32363_21	3671.07	k147_5617_21	3484.28
Beta_oxidation	fadA/acat	acetyl-CoA_acetyltransferase	K00632/K00626	k147_25946_65	746.246	k147_15806_65	1223.2	k147_46470_135	153.491	k147_2766_40	112.829
Beta_oxidation	fadA/acat	acetyl-CoA_acetyltransferase	K00632/K00626	k147_20222_62	979.814	k147_8699_40	268.791	k147_55283_31	92.6109	k147_47739_62	751.559
Beta_oxidation	fadA/acat	acetyl-CoA_acetyltransferase	K00632/K00626	k147_1761_31	97.4527	k147_17830_135	792.394	k147_6810_40	102.234	k147_43954_31	89.6852
Beta_oxidation	fadA/acat	acetyl-CoA_acetyltransferase	K00632/K00626	k147_1787_135	272.75	k147_11548_62	1534.58	k147_28185_62	540.259	k147_5617_65	237.682
Beta_oxidation	fadA/acat	acetyl-CoA_acetyltransferase	K00632/K00626	k147_29933_40	128.454	k147_1024_81	102.921	k147_32363_65	203.854	k147_5486_135	125.721
Beta_oxidation	fadH	2,4-dienoyl-CoA reductase	K00219	224325.AF_0455	832.655	224325.AF_0455	874.476	224325.AF_0455	229.846	224325.AF_0455	219.94
Methyltransferase	mtaA	methylcobamide:CoM_methyltransferase_MtaA	K14080	k147_26122_42	1317.19	k147_15171_57	1696.51	k147_47851_57	1944.88	k147_12736_57	1920.89
Methyltransferase	mtaB	methanol_methyltransferase_MtaB	K04480	k147_26122_43	1270.37	k147_15171_58	1821.69	k147_47851_58	6620.39	k147_12736_58	6307.67
Methyltransferase	mtaC	methanol_corrinoid_protein	K14081	k147_26122_41	2686.62	k147_15171_56	2723.41	k147_47851_56	4237.3	k147_12736_56	3653.63
WLP	cdhC	acetyl-CoA_decarbonylase/synthase,_CODH/ACS_complex_subunit_beta	K00193	k147_32481_13	1344.72	k147_5970_49	2108.36	k147_29198_49	1328.34	k147_787_49	1477.32
WLP	cdhD	acetyl-CoA_decarbonylase/synthase,_CODH/ACS_complex_subunit_delta	K00194	k147_32481_15	947.407	k147_5970_47	1147.63	k147_29198_47	181.641	k147_787_47	187.991
WLP	cdhE	acetyl-CoA_decarbonylase/synthase,_CODH/ACS_complex_subunit_gamma	K00197	k147_32481_16	907.1	k147_5970_46	904.312	k147_29198_46	164.588	k147_787_46	178.186
WLP	cdhA	anaerobic_carbon-monoxide_dehydrogenase,_CODH/ACS_complex_subunit_alpha	K00192	k147_21244_3	1447.32	k147_1417_3	2674.59	k147_15080_57	16.2058	k147_52140_57	15.9226
WLP	cdhB	anaerobic_carbon-monoxide_dehydrogenase,_CODH/ACS_complex_subunit_epsilon	K00195	k147_21244_2	1756.15	k147_1417_2	2006.65	k147_15080_58	12.2248	k147_52140_58	26.5582
WLP	cdhA	anaerobic_carbon-monoxide_dehydrogenase,_CODH/ACS_complex_subunit_alpha	K00192	k147_25412_57	10.1326	k147_14642_56	41.1115	k147_36920_7	539.791	k147_46590_67	732.445
WLP	cdhB	anaerobic_carbon-monoxide_dehydrogenase,_CODH/ACS_complex_subunit_epsilon	K00195	k147_25412_58	25.7625	k147_14642_57	31.3222	k147_36920_6	330.606	k147_46590_66	376.206
WLP	mer	5,10-methylenetetrahydromethanopterin_reductase	K00320	k147_1787_242	271.274	k147_17830_242	405.915	k147_46470_242	322.915	k147_52732_42	19.5965
WLP	mer	5,10-methylenetetrahydromethanopterin_reductase	K00320	k147_15106_42	75.6329	k147_7998_26	55.972	k147_36546_42	18.8127	k147_5486_242	301.321
WLP	met	5-methyltetrahydropteroyltriglutamate_homocysteine_methyltransferase	K00549	k147_26873_9	114.451	k147_17148_9	150.221	k147_26591_9	251.417	k147_50449_9	205.777
WLP	mtd	methylenetetrahydromethanopterin_dehydrogenase	K00319	k147_21384_35	1541.92	k147_1474_35	1783.68	k147_36620_35	1486.03	k147_46031_35	1221.06
WLP	mch	methenyltetrahydromethanopterin_cyclohydrolase	K01499	k147_25412_96	1123.38	k147_14642_94	1582.12	k147_15080_96	893.862	k147_52140_96	840.086
WLP	ftr	formylmethanofuran--tetrahydromethanopterin_N-formyltransferase	K00672	k147_14990_52	1243.7	k147_1024_78	3709.65	k147_6250_52	1432.18	k147_27631_52	1271.13
WLP	ftr	formylmethanofuran--tetrahydromethanopterin_N-formyltransferase	K00672	k147_1761_34	3945.52	k147_6723_52	1275.55	k147_55283_34	3028.59	k147_43954_34	2806.35
WLP	fwdA	formylmethanofuran_dehydrogenase_subunit_A	K00200	k147_25946_90	404.927	k147_15806_90	599.41	k147_32363_90	210.394	k147_5617_90	244.187
WLP	fwdB	formylmethanofuran_dehydrogenase_subunit_B	K00201	k147_25946_89	249.642	k147_15806_89	487.254	k147_32363_89	194.007	k147_5617_89	246.346
WLP	fwdB	formylmethanofuran_dehydrogenase_subunit_B	K00201	k147_14990_47	71.156	k147_6723_47	104.711	k147_6250_47	31.461	k147_27631_47	38.5487
WLP	fdwC	formylmethanofuran_dehydrogenase_subunit_C	K00202	k147_25946_91	315.269	k147_15806_91	408.701	k147_32363_91	205.934	k147_5617_91	240.109
WLP	fwdD	formylmethanofuran_dehydrogenase_subunit_D	K00203	k147_25946_88	409.694	k147_15806_88	1363.36	k147_32363_88	1087.47	k147_5617_88	1215.49
WLP	fwdF	formylmethanofuran_dehydrogenase_subunit_F	K00205	k147_32481_7	298.161	k147_5970_55	561.87	k147_29198_55	119.862	k147_787_55	141.183
WLP	fwdH	4Fe-5S_ferredoxin	K00204	NA	NA	NA	NA	NA	NA	NA	NA
WLP	fwdG	4Fe-4S_ferredoxin	K11260	k147_14990_48	160.239	k147_6723_48	204.409	k147_6250_48	103.294	k147_27631_48	101.947
Methanogenesis	mtrA	tetrahydromethanopterin_S-methyltransferase_subunit_A	K00577	k147_25946_38	1719.45	k147_15806_38	2610.84	k147_32363_38	105.845	k147_5617_38	98.4717
Methanogenesis	mtrB	tetrahydromethanopterin_S-methyltransferase_subunit_B	K00578	k147_25946_39	949.556	k147_15806_39	1803.84	k147_32363_39	55.8604	k147_5617_39	92.2759
Methanogenesis	mtrC	tetrahydromethanopterin_S-methyltransferase_subunit_C	K00579	k147_25946_40	2263.62	k147_15806_40	2699.24	k147_32363_40	99.7866	k147_5617_40	113.432
Methanogenesis	mtrD	tetrahydromethanopterin_S-methyltransferase_subunit_D	K00580	k147_25946_41	2141	k147_15806_41	2931.37	k147_32363_41	100.359	k147_5617_41	98.2004
Methanogenesis	mtrE	tetrahydromethanopterin_S-methyltransferase_subunit_E	K00581	k147_25946_42	2517.46	k147_15806_42	3160.13	k147_32363_42	225.075	k147_5617_42	209.409
Methanogenesis	mtrF	tetrahydromethanopterin_S-methyltransferase_subunit_F	K00582	NA	NA	NA	NA	NA	NA	NA	NA
Methanogenesis	mtrG	tetrahydromethanopterin_S-methyltransferase_subunit_G	K00583	NA	NA	NA	NA	NA	NA	NA	NA
Methanogenesis	mtrH	tetrahydromethanopterin_S-methyltransferase_subunit_H_	K00584	k147_25946_35	2263.39	k147_15806_35	2926.27	k147_32363_35	181.693	k147_5617_35	140.897
Methanogenesis	mcrA	methyl-coenzyme_M_reductase_alpha_subunit	K00399	k147_25946_62	6811.34	k147_15806_62	8438.52	k147_32363_62	1034.99	k147_5617_62	1180.56
Methanogenesis	mcrB	methyl-coenzyme_M_reductase_beta_subunit	K00401	k147_25946_58	5950.25	k147_15806_58	7117.32	k147_32363_58	1695.32	k147_5617_58	2017.28
Methanogenesis	mcrC	methyl-coenzyme_M_reductase_subunit_C	K03421	k147_25946_60	2815.86	k147_15806_60	6017.41	k147_32363_60	722.261	k147_5617_60	909.825
Methanogenesis	mcrD	methyl-coenzyme_M_reductase_subunit_D	K03422	k147_25946_59	5660.63	k147_15806_59	9913.75	k147_32363_59	1556.07	k147_5617_59	2328.96
Methanogenesis	mcrG	methyl-coenzyme_M_reductase_gamma_subunit	K00402	k147_25946_61	4189.15	k147_15806_61	7054.59	k147_32363_61	587.258	k147_5617_61	825.894
Energy_Metabolism	frhB	coenzyme_F422_hydrogenase_subunit_beta	K00441	k147_21384_1	136.503	k147_16249_12	952.671	k147_36620_1	48.645	k147_8289_12	110.927
Energy_Metabolism	frhB	coenzyme_F422_hydrogenase_subunit_beta	K00441	k147_29385_11	677.002	k147_1474_1	211.405	k147_48649_12	130.517	k147_46031_1	0
Energy_Metabolism	hoxY	NAD-reducing_hydrogenase_small_subunit	K18007	k147_21384_40	1114.1	k147_1474_40	1188.25	k147_36620_40	362.968	k147_46031_40	449.092
Energy_Metabolism	hoxH	NAD-reducing_hydrogenase_large subunit	K00436	k147_21384_41	1203.36	k147_1474_41	1198.98	k147_36620_41	308.93	k147_46031_41	344.137
Energy_Metabolism	mvhA	F420-non-reducing_hydrogenase_large_subunit_	K14126	k147_25412_24	88.4244	k147_14642_24	108.036	k147_15080_24	139.282	k147_52140_24	100.821
Energy_Metabolism	mvhG	F420-non-reducing_hydrogenase_small_subunit	K14128	k147_25412_26	69.758	k147_14642_25	114.627	k147_15080_25	71.2106	k147_52140_25	36.8155
Energy_Metabolism	mvhD	F420-non-reducing_hydrogenase_iron-sulfur_subunit	K14127	k147_25412_25	99.699	k147_14642_26	119.715	k147_15080_26	32.5586	k147_52140_26	60.0995
Energy_Metabolism	qmoB	quinone-modifying oxidoreductase_subunit QmoB	K16886	k147_25412_27	62.4333	k147_14642_27	137.896	k147_15080_27	66.7736	k147_52140_27	58.8052
Energy_Metabolism	qmoC	quinone-modifying oxidoreductase_subunit QmoC	K16887	k147_25412_29	110.457	k147_14642_29	151.151	k147_15080_29	228.274	k147_52140_29	202.707
Energy_Metabolism	hdrA	heterodisulfide_reductase_subunit_A	K03388	k147_25412_28	84.957	k147_15806_183	205.326	k147_15080_28	105.72	k147_5617_183	84.5439
Energy_Metabolism	hdrA	heterodisulfide_reductase_subunit_A	K03388	k147_25946_183	158.198	k147_14642_28	142.424	k147_32363_183	74.458	k147_52140_28	64.7743
Energy_Metabolism	hdrD	heterodisulfide_reductase_subunit_D	K08264	k147_25412_91	184.727	k147_14642_89	205.675	k147_15080_91	22.7111	k147_52140_91	18.2689
Energy_Metabolism	hdrD	heterodisulfide_reductase_subunit_D	K08264	k147_25946_32	296.093	k147_15806_32	515.938	k147_32363_32	75.9834	k147_5617_32	82.0228
Energy_Metabolism	fqoA	F420H2:quinone_oxidoreductase subunit_A	K22171	k147_1787_249	92.3185	k147_17830_249	31.0653	k147_46470_249	5.22068	k147_5486_249	7.39513
Energy_Metabolism	fqoBC	F420H3:quinone_oxidoreductase subunit_BC	K22172	k147_1787_250	217.52	k147_17830_251	381.403	k147_46470_251	51.4103	k147_5486_251	20.7593
Energy_Metabolism	fqoD	F420H6:quinone_oxidoreductase subunit_D	K22173	k147_1787_251	380.258	k147_17830_250	259.478	k147_46470_250	26.8581	k147_5486_250	8.30335
Energy_Metabolism	fqoF	F420H9:quinone_oxidoreductase subunit_F	K22174	k147_1787_254	158.943	k147_17830_254	259.478	k147_46470_254	0	k147_5486_254	0
Energy_Metabolism	fqoH	F420H10:quinone_oxidoreductase subunit_H	K22175	k147_1787_252	133.401	k147_17830_252	199.883	k147_46470_252	29.3962	k147_5486_252	18.9272
Energy_Metabolism	fqoI	F420H11:quinone_oxidoreductase subunit_I	K22176	k147_1787_253	204.784	k147_17830_253	181.739	k147_46470_253	15.8115	k147_5486_253	10.5531
Energy_Metabolism	fqoJ	F420H12:quinone_oxidoreductase subunit_J	K22177	k147_1787_244	65.447	k147_17830_244	35.2232	k147_46470_244	72.9207	k147_5486_244	79.0055
Energy_Metabolism	fqoK	F420H13:quinone_oxidoreductase subunit_K	K22178	k147_1787_245	0	k147_17830_245	26.9861	k147_46470_245	23.1319	k147_5486_245	63.7114
Energy_Metabolism	fqoL	F420H14:quinone_oxidoreductase subunit_L	K22179	k147_1787_247	197.505	k147_17830_247	185.505	k147_46470_247	30.9681	k147_5486_247	19.1822
Energy_Metabolism	fqoM	F420H15:quinone_oxidoreductase subunit_M	K22180	k147_1787_246	160.999	k147_17830_246	182.22	k147_46470_246	51.8345	k147_5486_246	48.7587
Energy_Metabolism	fqoN	F420H16:quinone_oxidoreductase subunit_N	K22181	k147_1787_248	104.993	k147_17830_248	90.0917	k147_46470_248	11.9223	k147_5486_248	11.917
Energy_Metabolism	glcD	glycolate_dehydrogenase	K00104	k147_29933_19	108.44	k147_14642_90	144.667	k147_32363_33	47.4235	k147_47739_15	634.696
Energy_Metabolism	glcD	glycolate_dehydrogenase	K00104	k147_20222_15	281.934	k147_8699_19	149.13	k147_15080_92	38.9789	k147_52140_92	41.1791
Energy_Metabolism	glcD	glycolate_dehydrogenase	K00104	k147_25412_92	223.336	k147_15806_33	565.855	k147_6810_19	23.1174	k147_2766_19	31.9832
Energy_Metabolism	glcD	glycolate_dehydrogenase	K00104	k147_25946_33	360.206	k147_11548_15	228.119	k147_28185_15	540.875	k147_5617_33	52.6803
Energy_Metabolism	atpE	V/A-type_H+/Na+-transporting_ATPase_subunit_E	K02121	k147_25741_2	436.11	k147_16295_2	923.316	k147_36671_2	106.053	k147_39682_2	159.552
Energy_Metabolism	atpC	V/A-type_H+/Na+-transporting_ATPase_subunit_C	K02119	k147_25741_3	376.562	k147_16295_3	500.757	k147_36671_3	63.8162	k147_39682_3	59.9604
Energy_Metabolism	atpF	V/A-type_H+/Na+-transporting_ATPase_subunit_F	K02122	k147_25741_4	88.8327	k147_16295_4	282.609	k147_36671_4	93.8834	k147_39682_4	114.839
Energy_Metabolism	atpA	V/A-type_H+/Na+-transporting_ATPase_subunit_A	K02117	k147_25741_5	706.299	k147_16295_5	1015.32	k147_36671_5	111.406	k147_39682_5	104.61
Energy_Metabolism	atpB	V/A-type_H+/Na+-transporting_ATPase_subunit_B	K02118	k147_25741_6	415.594	k147_16295_6	560.341	k147_36671_6	72.3316	k147_39682_6	65.9556
Energy_Metabolism	atpD	V/A-type_H+/Na+-transporting_ATPase_subunit_D	K02120	k147_25741_7	222.129	k147_16295_7	383.628	k147_36671_7	49.6376	k147_39682_7	65.7753
Energy_Metabolism	atpK	V/A-type_H+/Na+-transporting_ATPase_subunit_K	K02124	k147_14990_1	408.636	k147_16295_1	1045.31	k147_36671_1	189.745	k147_39682_1	72.1312
Energy_Metabolism	atpK	V/A-type_H+/Na+-transporting_ATPase_subunit_K	K02124	k147_25741_1	549.224	k147_6723_1	0	k147_6250_1	138.155	k147_27631_1	0
Energy_Metabolism	atpI	V/A-type_H+/Na+-transporting_ATPase_subunit_I	K02123	k147_14990_2	1657.34	k147_6723_2	1927.17	k147_6250_2	336.076	k147_27631_2	353.712
Gluconeogenesis	fbaB	fructose-bisphosphate_aldolase,_class_I	K11645	k147_14990_33	102.595	k147_15806_234	1328.59	k147_6250_33	1099.29	k147_5617_234	303.347
Gluconeogenesis	fbaB	fructose-bisphosphate_aldolase,_class_I	K11645	k147_25946_234	474.057	k147_6723_33	422.569	k147_32363_234	459.524	k147_27631_33	1100.68
Gluconeogenesis	tpiA	triosephosphate_isomerase_(TIM)	K01803	k147_26873_4	225.083	k147_17148_4	369.772	k147_26591_4	216.666	k147_50449_4	251.984
Gluconeogenesis	gap2	glyceraldehyde-3-phosphate_dehydrogenase_(NAD(P))	K00150	k147_25946_197	312.107	k147_15806_197	286.185	k147_32363_197	1066.75	k147_5617_197	1087.53
Gluconeogenesis	pgk	phosphoglycerate_kinase_[EC:2.7.2.3]	K00927	k147_22828_47	189.362	k147_18765_11	212.747	k147_54866_15	678.436	k147_46590_47	690.268
Gluconeogenesis	apgM	2,3-bisphosphoglycerate-independent_phosphoglycerate_mutase	K15635	k147_15844_190	211.456	k147_15806_201	200.56	k147_2999_190	133.116	k147_48978_190	179.164
Gluconeogenesis	apgM	2,3-bisphosphoglycerate-independent_phosphoglycerate_mutase	K15635	k147_25946_201	160.878	k147_8514_190	279.057	k147_32363_201	183.43	k147_5617_201	202.657
Gluconeogenesis	eno	ENO,_eno;_enolase	K01689	k147_1761_62	382.167	k147_1024_50	364.098	k147_55283_62	359.446	k147_43954_62	358.741
Gluconeogenesis	porA	pyruvate_ferredoxin_oxidoreductase_alpha_subunit	K00169	k147_25946_242	126.999	k147_8699_98	375.227	k147_6810_97	1565.74	k147_5617_242	59.0726
Gluconeogenesis	porA	pyruvate_ferredoxin_oxidoreductase_alpha_subunit	K00169	k147_29933_97	501.384	k147_15806_242	120.692	k147_32363_242	80.1466	k147_2766_97	1788.58
Gluconeogenesis	porA	pyruvate_ferredoxin_oxidoreductase_alpha_subunit	K00169			k147_15806_243	80.4746
Gluconeogenesis	porB	pyruvate_ferredoxin_oxidoreductase_beta_subunit	K00170	k147_25946_243	60.7486	k147_8699_99	168.293	k147_32363_243	24.1804	k147_2766_98	1094.48
Gluconeogenesis	porB	pyruvate_ferredoxin_oxidoreductase_beta_subunit	K00170	k147_29933_98	215.745	k147_15806_244	21.3604	k147_6810_98	927.783	k147_5617_243	22.9738
Gluconeogenesis	porD	pyruvate_ferredoxin_oxidoreductase_delta_subunit	K00171	k147_25946_241	62.3407	k147_15806_241	205.047	k147_6810_96	1665.5	k147_5617_241	62.8321
Gluconeogenesis	porD	pyruvate_ferredoxin_oxidoreductase_delta_subunit	K00171	k147_29933_96	98.2183	k147_8699_97	53.9722	k147_32363_241	22.2062	k147_2766_96	1990.98
Gluconeogenesis	porG	pyruvate_ferredoxin_oxidoreductase_gamma_subunit	K00172	k147_25946_240	62.6855	k147_15806_240	132.017	k147_32363_240	81.9329	k147_5617_240	89.4614
Gluconeogenesis	porG	pyruvate_ferredoxin_oxidoreductase_gamma_subunit	K00172	k147_29933_95	269.524	k147_8699_96	221.005	k147_6810_95	3863.68	k147_2766_95	3784.58
Gluconeogenesis	pps	pyruvate,_water_dikinase	K01007	k147_1787_146	209.784	k147_17830_146	356.573	k147_46470_146	610.252	k147_5486_146	703.093
Gluconeogenesis	aldob	fructose_1,6-bisphosphate_aldolase/phosphatase	K01622	k147_32481_56	287.447	k147_5970_6	452.648	k147_29198_6	235.417	k147_787_6	234.488
Pentose Phosphate Pathway	prsA	ribose-phosphate_pyrophosphokinase	K00948	k147_20222_3	151.923	k147_11548_3	301.818	k147_28185_3	187.128	k147_47739_3	237.506
Pentose Phosphate Pathway	rpiA	ribose_5-phosphate_isomerase_A	K01807	k147_1787_107	83.0307	k147_17830_107	93.5094	k147_46470_107	127.394	k147_5486_107	140.42
Pentose Phosphate Pathway	hxlB	6-phospho-3-hexuloisomerase	K08094	k147_15106_50	143.502	k147_7998_17	230.852	k147_36546_50	709.18	k147_52732_50	809.945
Pentose Phosphate Pathway	fae-hps	bifunctional_enzyme_Fae/Hps	K13812	k147_26873_5	939.038	k147_17148_5	960.58	k147_26591_5	792.838	k147_50449_5	726.23
Pentose Phosphate Pathway	hps-phi	3-hexulose-6-phosphate_synthase_/_6-phospho-3-hexuloisomerase	K13831	k147_29933_43	99.3844	k147_8699_43	233.87	k147_6810_43	287.389	k147_2766_43	323.171
TCA	pycA	pyruvate_carboxylase_subunit_A	K01959	k147_25412_105	2205.13	k147_8514_87	45.494	k147_15080_105	5466.63	k147_48978_87	42.0625
TCA	pycA	pyruvate_carboxylase_subunit_A	K01959	k147_15844_87	25.7039	k147_14642_102	1596.46	k147_2999_87	38.46	k147_52140_105	5421.31
TCA	pycB	pyruvate_carboxylase_subunit_B	K01960	k147_25946_14	285.998	k147_15806_14	263.797	k147_32363_14	405.291	k147_5617_14	414.888
TCA	cs	citrate_synthase	K01647	k147_1787_2	367.128	k147_17830_2	296.711	k147_46470_2	212.726	k147_27631_81	447.869
TCA	cs	citrate_synthase	K01647	k147_14990_81	389.519	k147_6723_81	439.832	k147_6250_81	568.498	k147_5486_2	297.899
TCA	idh	isocitrate_dehydrogenase	K00031	k147_21244_7	159.608	k147_1417_7	182.608	k147_36920_11	422.041	k147_46590_71	482.615
TCA	korA	2-oxoglutarate/2-oxoacid_ferredoxin_oxidoreductase_subunit_alpha	K00174	k147_15844_172	20.2077	k147_8514_172	28.0155	k147_2999_172	23.2454	k147_48978_172	22.984
TCA	korB	2-oxoglutarate/2-oxoacid_ferredoxin_oxidoreductase_subunit_beta	K00175	k147_15844_171	19.7287	k147_8514_171	27.0486	k147_2999_171	14.1287	k147_48978_171	8.01913
TCA	sucD	succinyl-CoA_synthetase_alpha_subunit	K01902	k147_1761_23	32.2638	k147_1024_89	61.8117	k147_55283_23	51.1384	k147_43954_23	67.2811
TCA	sucC	succinyl-CoA_synthetase_beta_subunit	K01903	k147_1761_24	64.8809	k147_1024_88	65.8388	k147_55283_24	113.747	k147_43954_24	116.947
TCA	fumA	fumarate_hydratase_subunit_alpha	K01677	k147_17423_20	142.328	k147_11254_20	150.068	k147_3355_20	40.6842	k147_3547_20	44.9709
TCA	fumB	fumarate_hydratase_subunit_beta	K01678	k147_17423_21	138.709	k147_11254_21	84.1959	k147_3355_21	37.847	k147_3547_21	26.0048
TCA	fumC	fumarate_hydratase,_class_II	K01679	NA	NA	NA	NA	NA	NA	NA	NA
