# Supplementary material for: Direct utilization of long-chain fatty acid for methane production by thermophilic Archaeoglobi
Source: Research Square preprint supplement (doi:10.21203/rs.3.rs-7873196/v1), 2025-10-24
Supplement: Supplementary file 3 [file 9140d2106f06095730a953b9.xlsx]

## Sheet: ANI_AAI
Supplementary Table 3 ANI and AAI analysis of reference Archaeoglobales MAGs and genomes.
ANI\AAI	GCF_000025285.1	DSM 5631	132-544_metabat2_scaf2bin.115	T11_maxbin2_scaf2bin.312	Archaeoglobus fulgidus DSM 4304	Archaeoglobus neptunius SE56	Archaeoglobus profundus DSM 5631	Archaeoglobus sulfaticallidus PM70-1	Archaeoglobus veneficus SNP6	Ferroglobus placidus DSM 10642	Geoglobus acetivorans SBH6	Geoglobus ahangari strain 234	Ca. M.hypatiae LCB24	Ca. M. sphaerolipidus DLY3	WYZ-LMO2	SJ3.Bin34	LCB024-003	LCB24	SJ3.Bin61	Bin S27	SKYB47	SKYBB_h_bin31	SKYB32	SKW111	SKYBB_h_bin44	SKYB18	SKYBB_i_bin18	JZ_75_SW_bin_109	DRC_201705_bins_99	GXS_202101_bins_42	SRBZ-1_201901_bins_28	GMQP_D_bin_18	JZ-3_D_bin_138	HHBFW-2_201803_bins_10	JZ-3_201705_bins_59	DJKA128_NP-F35_bin.22	DJKA76_ANT21_bin.13	DRTY-1_201901_bins_47	DRTY-1_201808_bins_13	SRBZ-1_201808_bins_19	SZTDM-1c_201709_bins_87	DRTY-1_201901_bins_37	DRTY-1_201808_bins_14	DRC_201705_bins_46	ZZQ_201803_bins_86	GMQP_201808_bins_54	GMQP_201705_bins_55	JZ-1_201709_bins_122	JZ-1_201705_bins_34
GCF_000025285.1	100	74.8	78.72	78.46	61.75	61.03	100	60.06	63.12	61.16	59.65	60	59.7	59.21	59.61	59.83	60.28	59.7	59.92	60.03	59.38	58.92	59.28	59.35	59.34	58.81	58.81	60.08	59.98	60.26	60.19	59.48	59.62	59.11	59.44	59.86	59.8	60.01	59.9	60.14	60.15	60.19	59.95	60.22	60.42	60.12	59.79	60.78	60.03
DSM 5631	74.2019	100	73.1	72.56	60.74	60.01	74.8	59.02	61.86	59.86	58.61	59.15	58.99	58.68	59.32	59.29	59.23	58.99	59.44	59.34	58.65	58.28	58.73	58.71	58.65	57.87	57.82	59.24	58.81	59.08	59.12	58.92	58.79	57.65	59.39	59.06	59.06	59.07	58.73	59.13	58.77	58.97	59.23	59.15	59.32	59	58.92	59.3	58.72
132-544_metabat2_scaf2bin.115	75.4312	73.8001	100	98.55	60.87	60.3	78.72	59.2	62.32	60.74	59	59.7	59.22	58.54	59.21	59.29	59.75	59.22	59.58	59.25	58.62	58.07	59.06	59.11	59.11	58.02	58.02	59.28	58.81	59.28	59.37	58.61	58.75	58.08	58.7	58.96	58.88	59.19	59.14	59.23	59.13	59.42	59.08	59.36	59.37	59.15	58.87	59.73	58.95
T11_maxbin2_scaf2bin.312	75.3859	73.6129	98.3292	100	60.84	60.31	78.46	59.19	62.17	60.64	58.99	59.87	59.27	58.52	59.17	59.29	59.77	59.27	59.42	59.23	58.64	57.97	58.77	58.74	58.84	58.08	58.08	59.1	58.93	59.24	59.12	58.46	58.82	58.27	58.62	58.89	58.96	59.1	59.03	59.23	59.12	59.27	59.09	59.27	59.34	59.16	58.85	59.65	58.87
Archaeoglobus fulgidus DSM 4304	70.7904	69.6219	70.5105	70.7659	100	75.95	61.74	62.07	62.93	62.15	61.15	61.96	65.1	64.37	64.99	65.16	65.41	65.1	65.09	65.2	64.29	64	63.91	64.1	63.99	64.44	64.44	64.82	64.78	65.02	65.11	64.68	64.72	64.02	64.91	65.17	65.19	64.89	64.83	64.94	64.96	65.22	65.11	65.02	65.5	64.92	64.74	65.82	64.82
Archaeoglobus neptunius SE56	70.2844	69.7249	69.6993	69.9281	74.2187	100	61.03	61.35	62.33	60.66	60.56	60.84	64.48	63.37	64.46	64.73	64.73	64.48	64.44	64.35	63.69	63.25	63.23	63.29	63.1	63.43	63.43	63.76	63.94	64.19	63.96	63.75	63.83	63.06	64.15	64.21	64.35	64	63.93	63.97	63.93	64.46	64.1	64.18	64.84	63.98	63.71	65.06	63.96
Archaeoglobus profundus DSM 5631	100	74.2193	75.2491	75.3625	70.8587	70.3298	100	60.06	63.12	61.16	59.65	60	59.7	59.21	59.61	59.83	60.28	59.7	59.92	60.03	59.38	58.92	59.28	59.35	59.34	58.81	58.81	60.08	59.98	60.26	60.19	59.48	59.62	59.11	59.44	59.86	59.8	59.97	59.9	60.09	60.15	60.19	59.95	60.22	60.42	60.12	59.79	60.78	60.03
Archaeoglobus sulfaticallidus PM70-1	70.526	69.5901	69.6518	69.7988	71.5845	70.9098	70.526	100	63.03	60.23	60.27	61.06	58.95	58.4	58.87	59.07	59.21	58.95	59.4	59.25	58.63	58.28	58.46	58.48	58.47	57.84	57.82	58.89	58.91	59.09	59	58.65	58.56	57.83	58.9	59.07	59.04	59.09	59.02	59.16	59.35	59.24	58.97	59.38	59.16	58.96	58.75	59.56	58.82
Archaeoglobus veneficus SNP6	70.7117	69.4776	70.115	70.3526	71.4407	70.6279	70.7117	71.2883	100	61.83	60.75	61.95	60.7	59.75	60.65	60.76	61.28	60.7	60.07	60.24	59.72	59.44	59.64	59.65	59.63	59.33	59.26	60.37	60.36	60.62	60.55	59.97	60.04	59.6	60.08	60.31	60.16	59.99	59.95	60.03	60.3	60.62	60.75	61.09	61.01	60.59	60.46	61.27	60.52
Ferroglobus placidus DSM 10642	70.9643	69.5649	70.3662	70.7781	71.5248	70.4845	70.9643	70.2709	70.7361	100	64.44	65.54	59.65	58.55	59.5	59.75	59.76	59.65	60.07	59.81	58.92	58.54	59.33	59.43	59.33	58.48	58.47	59.58	59.57	59.67	59.7	58.75	58.82	58.38	59.06	59.35	59.09	59.41	59.17	59.41	59.53	59.57	59.47	60.12	59.76	59.28	59.08	59.9	59.51
Geoglobus acetivorans SBH6	70.1692	69.7046	69.5036	69.7985	71.1404	70.8083	70.1692	70.6283	70.7159	70.996	100	75.14	58.97	58.05	58.89	58.9	59.05	58.97	58.98	58.76	58.02	57.85	57.81	57.76	57.76	57.74	57.73	58.81	58.82	58.81	58.77	58.32	58.23	57.65	58.43	58.52	58.44	58.63	58.49	58.61	58.77	58.98	58.92	59.13	59.16	58.82	58.72	59.35	58.7
Geoglobus ahangari strain 234	70.2528	69.6751	70.4696	70.689	72.3569	70.916	70.2528	71.4321	71.6053	71.807	74.2676	100	58.9	58.11	58.88	58.93	59.08	58.9	59.1	58.86	58.26	58.04	58.15	58.21	58.14	57.6	57.6	58.71	58.86	58.78	58.67	58.32	58.34	57.69	58.53	58.66	58.62	58.91	58.79	58.86	58.99	58.74	58.74	59.36	59.16	58.76	58.64	59.57	58.8
Ca. M.hypatiae LCB24	69.5269	69.4179	69.3612	69.618	70.6198	70.1672	69.5269	70.1325	69.9718	69.6274	69.6063	70.2595	100	78.97	97.91	98.11	98.64	100	72.98	72.75	71.44	71.18	62.96	63.04	63.01	78.18	78.18	64.76	64.71	64.67	64.54	79.33	79.23	78.37	78.93	81.39	81.28	71.81	71.74	71.76	71.81	80.33	80.21	80.16	80.76	80.17	79.83	80.81	79.86
Ca. M. sphaerolipidus DLY3	69.7074	68.6727	68.9912	69.3138	70.0719	69.845	69.7074	69.5404	69.4058	69.5459	69.1933	69.375	74.7825	100	79.17	79.53	79.85	78.97	71.72	71.72	71.76	71.49	63.19	63.16	63.23	83.55	83.54	66.52	65.33	65.35	65.06	98.33	98.91	98.65	98.92	79.96	79.89	72.4	72.41	72.33	72.41	86.62	86.95	85.11	85.74	86.61	86.81	85.75	86.11
WYZ-LMO2	69.028	69.0416	69.2658	69.1857	70.5031	69.982	69.028	69.5035	69.6387	69.5415	69.2986	69.8894	98.1522	74.7001	100	98.31	98.57	97.91	73.04	72.68	71.39	71.2	62.76	62.81	62.81	78.15	78.14	64.52	64.35	64.31	64.31	79.28	79.48	78.51	79.1	81.35	81.36	71.51	71.32	71.43	71.58	80.18	79.99	79.69	80.82	80.04	79.75	80.5	79.77
SJ3.Bin34	69.1993	69.3824	69.3114	69.3082	70.5243	70.0053	69.1993	69.7291	69.6549	69.5947	69.4526	69.949	98.4315	74.7588	98.3892	100	98.74	98.11	72.66	72.75	71.57	71.25	63.11	63.15	63.15	78.25	78.23	64.82	64.62	64.62	64.64	79.71	79.6	78.82	79.4	81.61	81.66	71.92	71.66	71.78	71.83	80.56	80.35	80.22	80.94	80.34	80.25	81.15	80.28
LCB024-003	69.2012	68.8754	69.2478	69.2379	70.3315	70.1478	69.2012	69.4285	69.5265	69.4306	69.1036	69.7561	98.8337	74.8643	98.6797	98.9506	100	98.64	72.71	72.62	71.58	71.45	63.22	63.25	63.24	78.65	78.61	64.81	64.46	64.39	64.52	79.89	80.05	78.45	79.45	81.33	81.72	72.41	72.05	72.24	71.82	80.78	80.99	79.9	81.21	80.85	80.48	81.27	80.86
LCB24	69.5269	69.4179	69.3612	69.618	70.6198	70.1672	69.5269	70.1325	69.9718	69.6274	69.6063	70.2595	100	74.7116	98.1831	98.4809	98.7773	100	72.98	72.71	71.44	71.18	62.96	63.04	63.01	78.18	78.14	64.78	64.7	64.67	64.53	79.32	79.22	78.37	78.93	81.39	81.28	71.81	71.74	71.76	71.81	80.33	80.21	80.16	80.76	80.17	79.83	80.81	79.86
SJ3.Bin61	69.5318	69.181	69.2618	69.1957	69.9773	69.9163	69.5318	69.6421	69.3136	69.7947	69.4696	69.3653	73.1635	71.5978	72.8061	72.2138	72.5983	73.1635	100	98.88	77.21	76.64	63.76	63.82	63.73	71.22	71.22	64.27	64.38	64.19	64.19	72.06	72.04	71.17	72.02	71.98	71.84	76.52	76.37	76.49	76.41	72.31	72.55	72.75	72.67	72.74	72.57	72.98	72.51
Bin S27	70.2062	69.5725	69.5607	69.6737	70.254	70.1485	70.2062	69.6956	69.7416	69.983	69.5997	69.3712	72.9528	71.8775	72.8287	73.0502	72.2877	72.9528	98.7144	100	77.15	76.61	63.66	63.72	63.68	71.38	71.38	64.14	64.42	64.06	64.14	71.99	72	71.51	72.18	71.98	71.94	76.48	76.38	76.52	76.42	72.33	72.68	72.56	72.72	72.58	72.48	72.96	72.48
SKYB47	69.2756	69.182	68.5371	68.5515	69.0504	69.4219	69.2756	69.1533	68.5877	69.2436	68.3625	67.9396	71.1004	72.0121	71.1337	71.207	71.0281	71.1004	73.6927	73.5704	100	99.94	63.62	63.81	63.84	71.11	71.09	63.4	63.51	63.47	63.44	71.81	71.94	70.77	71.65	71.61	71.58	77.04	76.76	77.09	76.84	72.24	72.47	72.4	72.38	72.35	72.14	72.47	72.12
SKYBB_h_bin31	69.2973	69.0006	68.5796	69.0349	69.3338	69.4907	69.2973	69.4769	68.901	69.5489	68.7628	68.5282	71.2995	72.2997	71.2271	71.2526	71.1166	71.2995	73.5374	73.5193	99.524	100	63.12	63.62	63.3	71.08	71.06	63.29	63.27	63.11	63.04	71.52	71.48	70.46	71.63	71.32	71.16	76.66	76.35	76.66	76.62	71.91	72.18	71.96	72.17	72.12	71.88	72.22	71.72
SKYB32	69.861	69.6677	69.0771	69.3407	69.2653	69.429	69.861	69.1817	68.7414	69.8799	68.9138	68.2699	69.2349	69.806	69.0879	69.0832	69.218	69.2349	70.3059	70.3108	70.892	71.0687	100	99.94	99.99	62.53	62.53	66.87	66.64	66.84	66.98	63.16	63.1	62.73	63.01	62.83	63.09	63.71	63.56	63.68	63.65	63.44	63.6	63.43	63.57	63.72	63.57	63.97	63.47
SKW111	70.103	69.7985	69.4177	69.455	69.3223	69.3256	70.103	69.059	68.8503	69.9573	68.59	68.1399	69.2289	69.6227	69.2461	69.1648	69.2465	69.2289	70.3891	70.3516	71.5034	71.8212	99.8967	100	99.92	62.72	62.72	66.82	66.63	66.75	66.95	63.23	63.2	62.78	63.16	62.9	63.12	63.75	63.59	63.73	63.71	63.8	63.78	63.58	63.7	63.88	63.71	64	63.64
SKYBB_h_bin44	69.8036	69.7794	69.1275	69.3736	69.2642	69.3023	69.8036	69.1218	68.799	69.8905	68.7588	68.2769	69.2078	69.5051	69.0897	69.0665	69.2257	69.2078	70.2444	70.2409	70.9787	71.1052	99.9573	99.9162	100	62.65	62.65	66.88	66.68	66.88	67.01	63.18	63.15	62.92	63.04	62.94	63.15	63.72	63.58	63.69	63.63	63.48	63.68	63.47	63.65	63.78	63.67	63.99	63.54
SKYB18	69.3924	68.8968	68.7508	68.7979	69.7396	69.5758	69.3924	69.2052	68.9322	69.5184	68.7433	68.4985	74.0996	78.8773	74.0712	74.0875	74.2086	74.0996	71.8317	71.7094	72.5273	72.7394	70.0267	70.1263	70.067	100	100	64.17	64.32	64.19	64.05	83.64	83.7	82.82	83.75	79.12	79.23	71.77	71.62	71.7	71.44	80.56	80.75	80.4	81.07	80.59	80.65	81.1	80.78
SKYBB_i_bin18	69.3924	68.8968	68.7508	68.7979	69.7396	69.5758	69.3924	69.2052	68.9322	69.5184	68.7433	68.4985	74.0996	78.8773	74.0712	74.0875	74.2086	74.0996	71.8317	71.7094	72.5273	72.7394	70.0267	70.1263	70.067	100	100	64.13	64.32	64.19	64.05	83.63	83.69	82.8	83.74	79.12	79.23	71.77	71.61	71.7	71.44	80.56	80.75	80.4	81.06	80.59	80.65	81.1	80.79
JZ_75_SW_bin_109	70.2073	69.4732	69.4977	69.6161	70.0726	70.0002	70.2073	69.6828	69.6035	70.0037	69.4107	69.0032	70.107	73.004	70.02	69.9745	69.9174	70.107	70.2351	70.4125	70.0878	70.5469	70.8852	70.88	70.8709	70.2584	70.2584	100	99.33	99.78	99.68	66.69	65.67	67.13	65.97	65.06	65.07	64.45	64.24	64.38	64.4	65.46	67.5	64.86	65.33	67.22	67.71	65.74	65.64
DRC_201705_bins_99	69.7433	69.2938	69.2942	69.2901	69.7931	69.7606	69.7433	69.3798	69.133	69.4906	69.1995	68.6751	70.0517	71.2621	70.0639	70.0586	70.0584	70.0517	70.3291	70.2703	70.5576	70.5818	70.9782	71.0035	70.9598	70.3623	70.3623	99.3741	100	99.04	99.51	65.59	65.17	66.3	64.92	65.3	65.14	64.58	64.4	64.56	64.47	65.15	65.74	64.72	65.17	65.86	66.03	65.52	65.59
GXS_202101_bins_42	69.7391	69.9021	69.6897	69.6263	69.7017	69.9033	69.7391	69.5018	69.3755	69.7963	69.2472	68.8095	70.1496	71.4706	70.2462	70.1645	70.2061	70.1496	70.3059	70.3414	70.5714	70.5008	71.0459	71.0586	71.0433	70.4472	70.4472	99.8041	99.4903	100	99.45	65.5	65.09	65.55	64.73	65.04	65.08	64.31	64.08	64.29	64.19	65.11	65.58	64.76	65.21	65.48	65.57	65.61	65.24
SRBZ-1_201901_bins_28	69.7815	69.637	69.2519	69.3863	69.8291	69.8958	69.7815	69.6145	69.5096	69.9122	69.3833	69.0421	69.9593	71.0615	69.9191	69.976	69.9364	69.9593	70.2323	70.2759	70.391	70.3273	70.9119	70.9555	70.9171	70.1839	70.1839	99.7275	99.6565	99.7373	100	65.3	65.12	65.48	64.59	65.25	65.12	64.26	64.05	64.15	64.29	65.08	65.32	64.78	65.21	65.36	65.42	65.71	65.37
GMQP_D_bin_18	69.6272	69.1689	69.0983	69.4188	70.0013	69.7487	69.6272	69.7287	69.4476	69.7909	69.2416	69.3876	74.8028	98.3254	74.7494	74.8407	74.917	74.8028	71.6913	71.8504	71.8264	71.9693	69.7177	69.5719	69.5731	78.8122	78.8122	72.8269	71.0349	70.9313	70.5997	100	98.7	98.55	98.5	80.06	80.09	72.57	72.48	72.48	72.38	86.43	86.82	85.18	85.68	86.59	86.83	85.62	86.02
JZ-3_D_bin_138	69.6489	69.2615	69.2117	69.2652	70.0183	69.7961	69.6489	69.3935	69.365	69.3573	69.0221	69.1658	74.814	98.8795	74.775	74.867	74.9564	74.814	71.8471	71.8561	71.9227	71.9474	69.8409	69.7919	69.727	78.824	78.824	72.0641	71.0988	70.8034	70.6532	98.3097	100	98.56	99.17	80.09	80.16	72.63	72.68	72.55	72.46	86.52	86.48	85.62	85.74	86.23	86.5	85.93	85.94
HHBFW-2_201803_bins_10	69.4373	69.2601	68.9594	68.9607	69.789	69.623	69.4373	69.0828	69.5469	69.4564	68.9383	69.0049	74.792	98.5494	74.7638	74.8536	74.8539	74.792	71.6832	71.5804	71.9742	71.952	69.7672	69.7238	69.7308	79.144	79.144	73.8065	71.9229	71.6651	71.2876	98.929	98.6698	100	98.05	78.95	79.11	72.22	71.94	72.13	72.02	84.38	85.46	83.31	84.29	85.53	85.76	84.78	84.71
JZ-3_201705_bins_59	69.1751	69.0725	68.9433	68.8673	69.8476	69.7474	69.1751	69.3126	69.2876	69.2537	69.1009	69.0117	74.6827	99.0058	74.7767	74.8403	74.8722	74.6827	71.7046	71.7167	71.9361	72.0845	69.5894	69.7124	69.6497	78.9333	78.9333	73.4392	71.1444	71.1532	70.4661	98.4366	99.176	98.5106	100	80.08	80.12	72.82	72.54	72.8	72.66	84.84	85.62	84.18	84.45	85.3	85.41	84.63	84.89
DJKA128_NP-F35_bin.22	69.8645	69.1864	69.3831	69.7122	70.5454	70.2436	69.8645	69.7683	69.8818	69.7449	69.5954	69.7852	77.2747	75.8518	77.1564	77.246	77.3149	77.2747	71.9099	72.0369	71.536	71.5427	69.5824	69.4602	69.4723	75.2482	75.2482	70.6377	70.4536	70.4659	70.4393	75.9236	75.8903	75.794	75.6281	100	99.1	72.1	72.08	72.07	71.88	79.74	79.52	79.39	80.07	79.69	79.53	80.41	79.67
DJKA76_ANT21_bin.13	69.5545	69.5102	69.4975	69.4173	70.5697	70.0949	69.5545	69.7319	69.5781	69.7014	69.4815	69.2467	77.2263	75.6843	77.2075	77.3029	77.3462	77.2263	71.9262	71.9677	71.5278	71.511	69.3443	69.3867	69.3603	75.2576	75.2576	70.6456	70.4256	70.5618	70.3901	75.7461	75.7652	75.7876	75.6811	99.3176	100	72.05	71.97	72.02	71.96	80.01	79.59	79.61	80.26	79.85	79.66	80.71	79.78
DRTY-1_201901_bins_47	69.8002	69.248	69.5653	69.7111	70.6073	69.9319	69.8002	69.6525	69.9365	70.2995	69.4446	70.2655	71.9944	72.3788	71.9364	71.9669	71.9617	71.9944	72.9842	73.0095	72.7831	72.7181	69.5652	69.5574	69.5541	71.8714	71.8714	70.2153	70.0676	70.0609	69.933	72.4461	72.4904	72.3562	72.3595	72.3685	72.3277	100	99.81	99.99	99.99	72.63	72.88	73.7	73.1	72.95	72.91	73.71	72.59
DRTY-1_201808_bins_13	69.54	68.984	69.6285	69.5027	70.6764	70.0354	69.54	69.3499	69.7621	70.229	69.1892	69.9722	71.9706	72.2737	71.8566	71.9595	71.9378	71.9706	72.9381	72.9259	72.8035	72.6804	69.6149	69.6483	69.6108	71.7814	71.7814	70.3115	70.1763	70.0506	70.0634	72.3117	72.4192	72.037	72.3556	72.2496	72.3344	99.198	100	99.76	99.69	72.37	72.82	73.62	72.95	73.03	72.97	73.6	72.76
SRBZ-1_201808_bins_19	69.5489	69.1339	69.602	69.5666	70.4536	69.8174	69.5489	69.3267	69.5675	70.1652	69.1835	69.9342	71.8349	72.2779	71.7377	71.8721	71.8783	71.8349	72.9207	72.9218	72.7083	72.6599	69.3199	69.369	69.3328	71.7929	71.7929	70.056	69.9495	69.8652	69.8357	72.3693	72.3315	72.1278	72.335	72.1025	72.2085	99.83	99.5309	100	99.98	72.6	72.77	73.64	73.01	72.85	72.82	73.51	72.53
SZTDM-1c_201709_bins_87	69.761	69.0471	69.654	69.6105	70.5686	69.8978	69.761	69.3659	69.7099	70.1574	69.2598	70.0516	71.9555	72.4503	71.7988	71.9156	71.879	71.9555	72.8336	72.8674	72.6846	72.6758	69.3664	69.3568	69.3646	71.8264	71.8264	69.9976	69.7853	69.7013	69.7303	72.4946	72.4437	72.3574	72.4184	72.3	72.3128	99.9654	99.7392	99.9513	100	72.53	72.79	73.73	72.85	72.86	72.89	73.22	72.49
DRTY-1_201901_bins_37	69.3024	69.3601	68.9796	68.9396	70.0586	69.9975	69.3024	69.6486	69.4288	69.5236	69.2059	68.9829	75.0183	83.8636	75.0272	75.0141	75.1024	75.0183	72.0977	72.0483	72.0824	72.125	69.8935	70.117	69.8571	76.5046	76.5046	71.6434	71.4989	70.92	70.6816	83.6714	83.6275	82.6254	82.2656	75.4867	75.5603	72.3377	72.3452	72.304	72.2787	100	99.19	98.39	98.94	98.71	98.79	98.97	98.47
DRTY-1_201808_bins_14	69.5837	69.0612	68.829	69.1918	70.1642	69.9204	69.5837	69.8155	69.5678	69.8421	69.2171	69.339	74.9416	84.3874	74.8003	74.8899	75.031	74.9416	72.0945	72.1543	72.0382	72.1207	69.9937	69.8983	69.86	76.4896	76.4896	74.4211	71.9194	71.3446	70.7312	84.0519	83.7189	83.0635	82.7373	75.4077	75.4233	72.4416	72.4481	72.4545	72.4816	99.0733	100	98.34	99.22	98.61	98.65	99.13	98.35
DRC_201705_bins_46	69.9722	69.8378	69.4808	69.5551	70.211	70.0038	69.9722	69.5575	69.3647	69.6034	69.4439	69.6834	74.8484	82.8064	74.7413	74.8808	74.9784	74.8484	72.1463	72.1083	72.0687	72.0565	69.9077	69.9926	69.8725	76.3986	76.3986	71.0879	70.8088	70.9345	71.0048	82.5196	82.8309	81.7847	81.4443	75.2556	75.3967	73.3693	73.5023	73.4055	73.2542	98.143	98.3136	100	98.68	98.45	98.53	98.41	98.54
ZZQ_201803_bins_86	69.2227	69.2334	68.9133	69.0039	69.9289	69.7418	69.2227	69.2617	69.256	69.5186	69.1111	69.0255	75.0288	82.7968	74.9956	75.0738	75.2133	75.0288	72.077	72.0442	72.1548	72.1724	69.7288	69.7792	69.7147	76.4537	76.4537	70.9953	71.066	70.8007	70.8103	82.6388	82.696	81.8171	81.4548	75.5084	75.5444	72.1583	72.1855	72.1857	72.0987	98.8258	99.118	98.9671	100	99.07	98.99	99.54	99.54
GMQP_201808_bins_54	69.7421	69.5777	69.0364	69.2514	70.1269	70.0678	69.7421	69.6151	69.4255	69.8322	69.4898	69.3139	74.8932	84.1891	74.8185	74.8534	75.0573	74.8932	72.0774	72.1246	72.0911	72.2742	70.0026	69.9155	69.9065	76.2848	76.2848	74.2554	72.1908	71.4755	70.8816	84.0057	83.625	83.0806	82.5413	75.3169	75.4826	72.3878	72.4926	72.3635	72.377	98.7359	98.7446	98.8841	99.0129	100	99.87	99.05	98.86
GMQP_201705_bins_55	69.4893	69.3236	68.9677	69.0862	69.9509	69.833	69.4893	69.688	69.3805	69.7151	69.2473	69.343	74.9169	84.3309	74.8277	74.9078	75.0522	74.9169	72.0964	72.1392	72.1295	72.2848	69.942	69.9001	69.8827	76.3462	76.3462	74.5717	72.0488	71.2158	70.6861	84.0362	83.7148	83.5301	82.6336	75.3836	75.4545	72.4396	72.6067	72.4355	72.4463	98.7015	98.6612	98.9519	98.9667	99.8445	100	99.08	98.44
JZ-1_201709_bins_122	69.2775	69.3027	68.9578	68.8446	70.1328	69.9293	69.2775	69.3164	69.2826	69.3884	69.1145	68.99	75.0488	82.5942	75.0684	75.1245	75.2252	75.0488	72.2132	72.0694	72.4279	72.3298	69.8819	69.9122	69.8533	76.6394	76.6394	71.5524	71.2849	71.3333	71.3142	82.3611	82.5345	82.1726	81.5022	75.5273	75.709	72.5395	72.5833	72.5465	72.4841	98.8182	98.8722	98.7797	99.6871	98.9641	98.9275	100	99.3
JZ-1_201705_bins_34	69.5578	69.3299	69.0521	69.0405	70.1673	70.0478	69.5578	69.6555	69.6275	69.7371	69.2749	69.1845	74.9559	83.7253	74.9079	74.9207	75.125	74.9559	72.2111	72.0721	72.1579	72.1842	69.8916	69.9749	69.8689	76.3927	76.3927	71.9087	71.8592	71.0927	71.3354	83.4112	83.3222	82.3644	82.099	75.4463	75.4789	72.375	72.6628	72.3512	72.2602	98.4521	98.5442	98.5944	99.5178	98.7125	98.682	99.6811	100
JZ-1_202101_bins_129	69.6787	69.4621	69.3029	69.1959	70.3671	70.2838	69.6787	69.5328	69.6515	69.7959	69.2415	69.3739	75.1481	83.6013	75.0787	75.1319	75.3547	75.1481	72.8586	72.699	72.8904	72.8558	70.2825	70.3686	70.2277	76.3943	76.3943	71.5724	70.9622	71.4298	71.3372	83.0431	83.3397	82.371	82.3419	75.5725	75.6728	73.5024	73.6825	73.514	73.4254	96.7816	96.9712	97.0167	97.8984	97.0068	97.0226	97.8374	98.0002
JZ-1_202007_bins_63	69.5961	69.2852	69.1125	69.1405	70.1615	70.0776	69.5961	69.5488	69.4809	69.6625	69.4164	69.5248	74.9749	83.2385	74.8886	74.9517	75.0854	74.9749	72.1782	72.1095	72.1419	72.1573	69.9757	69.9529	69.9411	76.3416	76.3416	71.2696	71.6299	71.0209	70.8201	83.0412	83.0934	82.1354	81.7981	75.4502	75.4986	72.2739	72.3428	72.3063	72.1899	98.6934	98.8258	98.8163	99.5926	98.9443	98.9421	99.7881	99.7096
JZ-1_201912_bins_57	69.1439	69.3732	68.894	68.9299	69.8897	69.9144	69.1439	69.5905	69.2962	69.4596	69.0032	68.9331	75.1027	81.543	75.119	75.1203	75.2401	75.1027	72.1307	72.0026	72.1294	72.2307	69.9573	70.0023	69.9357	76.4485	76.4485	71.2124	71.727	71.1458	70.7914	81.4437	81.4583	81.1143	80.1951	75.4911	75.5028	72.0876	72.2214	72.0779	72.0162	98.9402	99.1133	99.0855	99.7156	99.1262	99.1527	99.8889	99.8136
JZ-1_201901_bins_117	69.5881	69.3555	69.3085	69.2558	69.985	70.1674	69.5881	69.6129	69.5434	69.8082	69.6517	69.4947	75.2466	82.3562	75.1402	75.2113	75.3105	75.2466	72.14	72.0214	72.1456	72.1389	70.0747	70.0625	70.0117	76.5206	76.5206	71.4365	71.9821	71.2235	71.0205	82.0985	82.271	81.4964	80.7828	75.5674	75.6495	72.2908	72.4254	72.2681	72.1261	98.7946	98.9415	99.066	99.659	99.139	99.1288	99.8356	99.7474
JZ-1_201803_bins_92	69.4701	69.702	69.2822	69.2794	69.7363	69.8867	69.4701	69.3673	69.3118	69.5944	69.1454	69.0584	75.0225	81.8602	75.0107	75.0033	75.2416	75.0225	72.0398	72.081	71.9845	71.9595	69.8324	69.9144	69.8214	76.4172	76.4172	70.8656	71.1434	70.7361	70.7319	81.6566	81.8081	80.9563	80.5931	75.382	75.5314	72.0555	72.0922	72.0702	72.0145	98.9984	99.1324	99.058	99.7328	99.0846	99.0835	99.6934	99.6904
JZ-2_202101_bins_110	69.5111	69.4057	69.2115	69.2256	69.9526	69.9095	69.5111	69.5267	69.3573	69.7163	69.399	69.3376	75.0055	81.2039	74.9911	75.0492	75.1876	75.0055	72.0988	71.9637	72.0218	72.0219	69.9609	69.9969	69.8966	76.3246	76.3246	70.99	71.2315	70.5487	71.0591	80.8812	81.2643	80.3793	80.1366	75.4501	75.5312	72.1615	72.2231	72.1042	72.0819	98.5406	98.628	98.6644	99.279	98.8641	98.8388	99.4242	99.4392
SRBZ-1_201901_bins_46	69.4755	69.4638	69.1313	69.212	70.0634	70.1468	69.4755	69.5772	69.5105	69.6935	69.2939	68.9546	75.0697	82.6765	75.0838	75.0575	75.1523	75.0697	72.2841	72.1501	72.3791	72.3564	70.221	70.2541	70.2362	76.6221	76.6221	72.0982	72.2991	71.6191	71.0771	82.2914	82.4412	81.9355	81.2115	75.5745	75.6137	72.5292	72.5499	72.5364	72.4215	98.982	99.1658	99.3076	99.3103	99.1976	99.2042	99.3689	99.2436
SRBZ-1_201808_bins_76	69.3682	69.3644	68.8592	68.9229	70.0306	69.9103	69.3682	69.5596	69.5808	69.6439	69.1955	69.2225	75.0058	83.7434	74.9212	75.035	75.11	75.0058	72.0838	72.0718	72.1415	72.1507	69.9919	70.0432	69.9943	76.6945	76.6945	71.6669	71.8825	70.9103	70.8546	83.4427	83.4141	82.497	82.2085	75.3979	75.5493	72.3914	72.4737	72.373	72.3236	98.9712	99.2722	98.8577	99.0764	99.0111	98.9772	99.0045	98.8945
SZTDM-1c_201709_bins_50	69.3498	69.0731	68.7774	68.8242	70.0585	69.9536	69.3498	69.364	69.3445	69.5214	69.1927	69.1873	74.9851	83.5185	74.9376	74.9824	75.1488	74.9851	72.1355	72.0734	72.1394	72.1162	69.813	69.8889	69.7996	76.3079	76.3079	72.1135	71.8638	71.4285	71.0151	83.3578	83.3681	82.4689	82.0965	75.4091	75.5453	72.4549	72.5452	72.4613	72.3888	99.0084	99.1517	99.3492	99.2098	99.3118	99.3121	99.2841	99.1982
SRBZ-2_201803_bins_23	69.0033	69.1592	68.7747	68.6298	69.7307	69.7204	69.0033	69.1561	68.9044	69.3055	68.7367	68.7149	74.8946	83.7733	74.9134	74.957	75.1205	74.8946	72.0494	71.9954	72.1223	72.1491	69.7668	69.8677	69.7775	76.5593	76.5593	73.8447	72.2628	71.3191	70.7471	83.5861	83.4108	82.7657	82.5835	75.3946	75.5248	72.3742	72.4548	72.3794	72.3639	98.8953	98.8435	99.3557	99.1299	99.0985	99.0952	99.2095	99.0425
ZMQR_201912_bins_18	69.2639	69.0985	68.7687	68.8269	70.0064	69.8375	69.2639	69.6508	69.315	69.4545	69.1135	69.0169	74.9401	84.0914	74.9131	74.9316	75.1187	74.9401	72.1943	72.151	72.184	72.2977	70.0259	70.1047	70.0245	76.3731	76.3731	74.4208	71.6645	71.6363	71.0493	83.7552	83.6436	83.3767	82.5067	75.4487	75.6458	72.5324	72.6479	72.5586	72.4999	98.8387	98.8175	98.9284	99.0217	99.6708	99.7155	99.1548	98.8411
ZZQ_201803_bins_85	69.2386	69.1699	68.9119	68.9839	69.9036	69.8547	69.2386	69.2247	69.2046	69.2787	68.7439	68.8002	71.9387	73.5755	71.9477	71.9859	72.0057	71.9387	73.0678	72.961	73.4791	73.4209	70.1242	70.1948	70.095	72.8059	72.8059	70.4526	70.4538	70.4633	70.2377	73.5257	73.5882	73.8227	73.436	72.5508	72.5757	73.846	73.9115	73.806	73.8881	73.3271	73.4928	73.445	73.1521	73.4336	73.4533	73.3761	73.6977
JZ-1_201803_bins_18	69.2923	69.268	69.1115	69.0408	70.0457	69.84	69.2923	69.3679	69.1072	69.2681	68.9564	68.8642	72.4949	75.0691	72.42	72.4813	72.485	72.4949	73.1047	73.0281	73.5883	73.5072	69.9443	70.1273	69.9065	73.177	73.177	70.6335	70.4441	70.4846	70.778	75.0557	74.8767	75.223	74.4914	73.0615	73.043	74.0978	74.0883	74.0923	74.173	76.0004	77.0232	76.6371	76.4229	76.9399	77.24	76.7709	78.7781
JZ-1_201709_bins_58	69.5571	69.4117	69.1641	69.1853	69.8192	69.7683	69.5571	69.2763	69.3465	69.5744	69.281	69.0978	71.9269	73.4509	71.9578	71.9436	71.8963	71.9269	72.9392	72.8704	73.567	73.5038	70.0385	70.138	70.0317	72.8189	72.8189	70.5821	70.5409	70.4151	70.3345	73.2829	73.3081	73.6661	73.2355	72.4607	72.4637	73.8787	73.8734	73.8602	73.8858	73.4395	73.3209	73.433	73.173	73.3275	73.3893	73.2212	73.3579
JZ-1_201705_bins_16	69.3576	69.3011	68.8452	68.8401	70.0038	69.841	69.3576	69.3464	69.2798	69.3269	68.9604	68.826	71.9619	73.7507	72.0167	72.0127	71.9585	71.9619	73.1158	72.9993	73.5717	73.517	70.0533	70.1768	70.0217	72.8692	72.8692	70.4113	70.366	70.1728	70.1458	73.4519	73.6384	73.6815	73.4049	72.5906	72.5569	73.9625	74.0034	73.9693	74.0257	73.3839	73.6206	73.6512	73.0664	73.6018	73.5665	73.3449	73.4962
JZ-1_202101_bins_85	69.248	69.0978	68.8893	68.9131	69.5417	69.5945	69.248	69.0487	69.0313	69.3423	68.9793	68.5684	72.0671	73.5004	72.1	72.0829	72.0596	72.0671	72.6677	72.5682	73.1483	73.0977	69.6557	69.6681	69.6816	73.0189	73.0189	70.1837	70.1167	69.7732	70.0702	73.4807	73.3401	73.6572	73.3723	72.4678	72.5384	73.1938	73.1678	73.1909	73.3151	75.6332	75.9938	76.0996	76.1048	76.0203	75.9806	76.3706	76.9263
JZ-1_202007_bins_10	69.4127	69.4384	68.7842	68.9711	69.9778	69.7804	69.4127	69.1894	69.2408	69.3454	69.0841	68.9184	72.0083	73.3215	71.9946	71.9767	72.021	72.0083	72.9674	72.8555	73.6033	73.503	69.9892	70.0594	69.9975	72.8287	72.8287	70.3078	70.3165	70.1876	70.133	73.1556	73.2368	73.2271	73.2664	72.4208	72.4701	73.8348	73.9089	73.837	73.8402	73.2328	73.3447	73.465	73.0801	73.3273	73.4313	73.295	73.6596
JZ-1_201912_bins_103	69.4784	69.3928	68.9339	68.823	69.7794	69.6321	69.4784	69.3168	69.2133	69.3617	69.1729	68.6115	71.9262	73.3516	71.963	71.9399	71.9789	71.9262	72.9389	72.845	73.5766	73.5015	69.8545	69.9874	69.8358	72.8233	72.8233	70.214	70.1604	70.1453	70.0895	73.3305	73.2762	73.3143	73.2029	72.419	72.5027	73.8068	73.8114	73.8059	73.9017	73.1833	73.3387	73.4537	73.023	73.3541	73.3593	73.1806	73.6327
JZ-1_201901_bins_60	69.5215	69.1856	68.9729	69.0714	69.6562	69.6996	69.5215	69.3184	69.1478	69.5148	68.9148	68.5723	71.8215	73.2501	71.8514	71.8448	71.9012	71.8215	72.9829	72.8535	73.5293	73.4467	70.1654	70.2333	70.1352	72.74	72.74	70.3062	70.2818	70.3006	70.1981	73.2566	73.2962	73.3423	73.1066	72.4384	72.523	73.8259	73.8448	73.8152	73.9071	73.2635	73.2554	73.2267	72.921	73.2914	73.2821	73.1039	73.6982
JZ-2_202101_bins_99	69.3695	69.1563	68.8962	68.9384	69.9011	69.8766	69.3695	69.1159	69.2794	69.3695	69.1025	68.7518	71.7344	73.032	71.7484	71.7129	71.7735	71.7344	72.8705	72.8167	73.4672	73.3941	69.9915	70.0345	69.996	72.7381	72.7381	70.5232	70.6261	70.2357	70.2471	73.0336	73.153	72.9715	73.1623	72.3866	72.4161	73.6975	73.6495	73.7082	73.7927	73.1734	73.1812	73.1749	72.8827	73.1415	73.2019	73.2579	73.5449
DRTY-2_201901_bins_58	69.7436	69.1549	69.5324	69.8895	70.2851	69.9315	69.7436	69.378	69.7582	70.0213	69.4436	69.8124	72.0023	73.3958	71.7532	71.8374	71.773	72.0023	72.8881	72.9336	73.1632	73.0922	69.84	69.9742	69.7841	72.1406	72.1406	71.0082	70.2895	69.9895	70.1307	73.26	73.1677	73.5577	72.8506	72.2924	72.1781	89.3112	90.0828	89.3204	89.3387	73.2575	73.516	75.3226	72.5355	73.6206	73.6294	72.7633	72.8076
DRTY-1_201901_bins_16	69.3312	68.72	69.2459	69.3436	70.2091	69.7031	69.3312	69.0619	69.3961	69.7971	69.2177	69.4696	71.7662	73.6227	71.741	71.8123	71.9248	71.7662	72.8309	72.8679	73.0021	72.8909	69.7139	69.7151	69.7031	71.9803	71.9803	71.9453	70.1319	69.9806	69.9239	73.9282	73.1271	72.6602	73.1072	72.0691	72.0543	89.0621	89.6395	89.0586	89.1555	72.1633	74.1254	75.0223	72.1003	73.9592	74.3217	72.4945	72.8449
ZZQ_201803_bins_88	69.6422	69.1746	69.4209	69.3722	70.1678	69.6026	69.6422	68.9327	69.795	69.7448	69.1652	69.3871	71.7877	72.3954	71.8949	71.8586	71.8483	71.7877	72.9061	72.8283	73.068	72.9468	69.6331	69.6561	69.6175	72.2186	72.2186	70.1646	70.1181	69.8475	69.8322	72.4476	72.4494	72.4785	72.271	72.1912	72.2256	89.9615	90.5901	89.9446	89.8825	72.3629	72.6135	74.1028	72.4314	72.5702	72.5869	72.425	72.3836
HHBFW-2_201803_bins_77	69.5279	68.9437	69.4372	69.4163	70.2754	69.8774	69.5279	69.0761	69.8248	70.1047	69.3231	69.6649	71.7359	72.6172	71.6967	71.6832	71.5684	71.7359	72.8905	72.935	73.1004	72.9684	69.728	69.9872	69.7169	71.8836	71.8836	70.071	70.0227	69.8505	69.7423	72.5053	72.5731	72.0256	72.5504	72.2608	72.2823	89.583	90.3389	89.5751	89.5387	73.2314	72.589	74.9586	72.4989	72.8395	72.911	72.6739	72.6134
GXS_202101_bins_35	69.3103	69.2321	69.1464	69.3586	70.3665	69.6151	69.3103	69.3196	69.8328	69.9585	69.1883	69.4769	71.9194	74.0686	71.8785	71.962	71.8877	71.9194	73.094	73.1412	73.2542	73.3263	69.8787	70.1327	69.8898	72.3242	72.3242	72.2138	70.4424	70.1443	70.9327	73.4185	73.5399	74.0408	73.5493	72.2028	72.2827	89.5815	90.2152	89.5735	89.7798	73.1243	73.6647	75.7359	72.7811	73.9375	74.5271	73.0919	75.707
GXS_202007_bins_51	69.3962	69.1604	69.31	69.3316	70.0477	69.6967	69.3962	69.1968	69.4453	69.7077	68.8977	69.2571	71.8363	72.906	71.7175	71.8374	71.8045	71.8363	72.998	72.9631	73.2702	73.1384	69.7863	69.9131	69.7598	72.0248	72.0248	70.5417	70.0675	69.9617	69.9064	72.8727	72.5994	72.8357	72.7423	72.0864	72.2192	89.4859	90.1424	89.4757	89.5164	73.1218	72.9924	74.813	72.4801	73.2804	73.2974	72.7507	72.7244
GXS_201912_bins_66	69.6185	69.2665	69.3358	69.3497	70.219	69.8985	69.6185	69.6857	69.5864	69.9366	69.2712	69.6926	71.9066	72.5006	71.8828	71.9262	71.9379	71.9066	73.2168	73.1506	73.2987	73.1693	69.9203	70.0281	69.9163	72.0014	72.0014	70.3934	70.2239	70.1908	70.0231	72.5848	72.4623	72.2865	72.4434	72.2581	72.4065	89.7902	90.2957	89.769	89.7653	73.0923	72.739	75.0755	72.5555	72.9445	72.9635	72.8298	72.5899
GXS_201907_bins_24	69.3489	69.0412	69.1806	69.2724	70.262	69.844	69.3489	69.2442	69.7631	69.97	69.2055	69.6462	71.7935	72.5887	71.6233	71.7408	71.7778	71.7935	73.0113	72.976	73.0803	72.9841	69.8029	69.998	69.8235	72.0489	72.0489	70.5631	70.1713	69.926	69.9804	72.6321	72.6313	72.8302	72.4488	72.056	72.1593	89.4169	90.0285	89.4021	89.3685	73.0894	73.0874	74.7396	72.3994	73.2446	73.276	72.6739	72.6707
JZ-1_201803_bins_44	69.319	69.2767	69.1465	69.34	70.0791	69.5373	69.319	68.9443	69.4314	69.6991	69.057	69.2945	71.5106	72.0721	71.4834	71.5798	71.4983	71.5106	72.8197	72.8433	72.8911	72.8283	69.5792	69.7706	69.5825	71.716	71.716	69.9527	70.0404	69.986	69.8854	72.1709	72.1545	72.3328	72.1195	71.8809	72.0223	89.7318	90.3604	89.7313	89.7318	72.6028	72.4702	74.3043	72.2873	72.5253	72.5521	72.437	72.3983
JZ-1_201709_bins_66	69.2458	68.8696	69.1267	69.1926	70.1185	69.644	69.2458	68.9442	69.3103	69.4683	68.9705	69.2647	71.7505	72.5178	71.6315	71.7105	71.6542	71.7505	72.7968	72.7524	73.0191	72.946	69.593	69.7047	69.5748	71.9204	71.9204	70.6653	70.2654	70.1342	70.0852	72.5505	72.3607	72.1375	72.3611	71.9225	71.9699	89.7078	90.3116	89.6998	89.7937	72.6734	72.7513	74.6649	72.368	72.8311	72.8433	72.448	72.3974
JZ-1_201705_bins_73	69.3759	68.8247	69.3283	69.4556	70.2475	69.9296	69.3759	69.2917	69.7341	70.0355	69.2527	69.7301	71.8349	73.3451	71.651	71.718	71.6988	71.8349	72.9106	72.8656	72.9881	72.9375	69.9844	70.0684	70.0012	71.9321	71.9321	71.9289	70.3591	70.0017	70.0028	73.2316	72.9411	73.3386	72.9442	71.9902	72.2073	89.3911	90.0725	89.3797	89.4521	72.6239	73.8005	75.2306	72.3784	74.0214	73.987	72.582	72.651
JZ-2_201601_bins_20	69.4594	69.004	69.2807	69.3448	70.3217	69.6707	69.4594	69.089	69.6382	69.8303	68.9415	69.497	71.8156	73.2529	71.6264	71.8044	71.8037	71.8156	72.971	72.9362	73.1371	73.0179	69.8071	70.0126	69.833	72.0195	72.0195	71.7004	70.2198	69.9548	70.1101	73.2339	72.9596	73.342	72.9961	72.0756	72.3114	89.3689	90.0595	89.3652	89.3143	73.2011	73.8036	74.7189	72.412	73.8824	73.8928	72.7877	72.7582
JZ-1_202101_bins_38	69.75	69.2243	69.544	69.3032	70.1886	69.8193	69.75	69.395	69.5498	69.873	69.2769	69.557	71.6873	72.0724	71.6233	71.6809	71.7198	71.6873	73.04	73.0237	73.1139	73.0102	69.7339	69.7803	69.7257	72.1204	72.1204	70.0458	70.3228	69.9543	69.8465	72.2273	72.222	72.4446	72.2288	72.2046	72.3174	89.7769	90.3516	89.789	89.7887	72.4326	72.3196	74.3494	72.2794	72.5763	72.5952	72.5689	72.3393
JZ-1_202007_bins_43	69.2897	68.8618	69.2815	69.3838	70.3131	69.7113	69.2897	69.0202	69.5511	69.7643	69.1325	69.5381	71.7886	72.3501	71.7749	71.7711	71.7606	71.7886	72.965	72.9315	73.1028	73.0032	69.6081	69.6649	69.6019	71.9875	71.9875	70.1692	70.2079	70.0478	69.8951	72.6321	72.4859	72.3197	72.386	72.1453	72.2207	89.6452	90.3031	89.6445	89.6492	72.4441	72.6315	74.7089	72.5205	72.5792	72.6381	72.6018	72.7587
JZ-1_201912_bins_26	69.334	69.0402	69.2405	69.291	70.0944	69.7352	69.334	69.2181	69.4939	69.7439	69.1539	69.4316	71.7418	72.2881	71.7275	71.7732	71.6957	71.7418	73.0134	73.0095	73.1872	73.0895	69.617	69.7944	69.6154	71.9047	71.9047	70.1619	70.204	69.8556	69.8236	72.3715	72.3695	72.4011	72.292	72.0728	72.1687	89.6283	90.2452	89.6365	89.6662	72.9906	72.4032	74.8968	72.3253	72.541	72.5075	72.5433	72.4692
JZ-1_201907_bins_76	69.8782	68.897	69.5192	69.9028	70.3139	69.9902	69.8782	69.5113	69.9752	70.2849	69.5023	70.0868	71.918	72.4627	71.6079	71.7654	71.6827	71.918	72.9055	73.0081	73.1527	73.0902	70.1187	70.108	70.0053	71.962	71.962	70.7519	70.0086	69.8819	69.8734	72.5685	72.4429	72.7637	72.3228	72.1465	72.0701	89.6436	90.311	89.6231	89.6418	73.0166	72.9435	74.6348	72.272	72.8741	72.9031	72.6316	72.41
JZ-1_201901_bins_78	69.2893	69.0378	69.1155	69.1663	70.1569	69.5112	69.2893	68.8387	69.392	69.4779	68.9059	69.1787	71.6765	72.361	71.5818	71.6378	71.5779	71.6765	72.8503	72.7863	72.9161	72.8373	69.6975	69.6818	69.6614	71.9853	71.9853	70.3731	70.1379	69.8668	69.8578	72.4984	72.4174	72.5054	72.3159	71.8716	72.0492	89.5872	90.2971	89.5742	89.5676	72.0283	72.5301	74.3362	72.1636	72.6995	72.72	72.403	72.6263
JZ-2_202101_bins_144	69.6385	69.3999	69.6185	69.7349	70.3069	69.7458	69.6385	69.4614	69.8385	70.026	69.1368	69.5433	72.0885	72.5939	72.0279	72.0529	72.0265	72.0885	73.1893	73.1777	73.342	73.2669	70.0625	70.2147	70.0628	72.1936	72.1936	69.9775	70.034	69.6616	69.8316	72.6725	72.7047	72.5281	72.7679	72.3312	72.4288	89.7155	90.2906	89.6842	89.7326	72.8864	72.7278	74.4707	72.6541	72.8283	72.9122	72.9033	72.8322
DRTY-6_201808_bins_27	69.85	69.6499	69.739	69.8113	70.5801	69.9874	69.85	69.4798	69.7239	69.95	69.6704	69.9303	71.8343	75.6062	71.8565	71.86	71.9551	71.8343	73.0865	73.169	73.0472	72.899	70.0776	70.2724	70.0611	72.3021	72.3021	75.5344	70.9179	71.2741	71.0509	74.7668	74.2494	75.9385	74.9056	72.1915	72.4933	88.7356	89.7107	88.714	89.133	73.553	76.7031	75.5989	73.0517	76.6918	77.6831	73.547	74.9582
DRTY-6_201709_bins_87	69.3995	69.1252	69.4744	69.667	70.1566	69.8985	69.3995	69.373	69.6847	69.9299	69.2205	69.7102	71.8444	72.6644	71.7889	71.8494	71.8373	71.8444	73.0936	73.0829	73.1799	73.0351	69.9011	69.9546	69.8556	72.0748	72.0748	70.5032	70.2676	69.9357	70.1891	72.898	72.6185	72.8912	72.5568	72.2139	72.3119	89.6122	90.2196	89.608	89.538	72.7809	73.1935	74.3618	72.6195	73.3967	73.3869	72.81	72.9323
DRTY-6_201705_bins_205	69.7384	69.1985	69.6686	69.7061	70.2052	69.7621	69.7384	69.4584	69.7561	70.1743	69.3155	69.7638	71.9018	72.4871	71.7858	71.8269	71.9709	71.9018	72.9216	72.8724	73.1806	73.1258	69.9821	70.172	69.9357	72.1323	72.1323	70.6107	70.1439	70.0824	70.1155	72.637	72.4193	72.2856	72.4618	72.1861	72.3478	89.4658	90.3249	89.4337	89.5206	73.2927	72.9943	74.573	72.3837	72.7631	72.8468	72.6791	72.6013
DRTY-8_201705_bins_15	69.6179	69.2409	69.3324	69.3414	70.2529	69.8098	69.6179	69.362	69.3245	69.7211	69.2087	69.524	71.6226	73.0099	71.5252	71.5924	71.5035	71.6226	72.8375	72.8255	73.069	72.9963	69.9552	69.9643	69.9284	72.1206	72.1206	71.9664	70.1845	70.3056	69.8986	73.0385	72.7764	73.3843	72.9141	72.1014	72.3495	89.8476	90.4646	89.8116	89.8509	72.4067	73.553	75.181	72.3895	74.0864	74.261	72.6799	72.8534
DRTY-7_201803_bins_15	69.74	68.9125	69.5643	69.3665	70.636	70.2082	69.74	69.3695	69.7544	70.1703	69.2875	69.5399	71.898	74.2077	71.8725	71.8901	71.8341	71.898	72.9688	72.9872	73.263	73.1724	70.1077	70.3711	70.111	71.9636	71.9636	74.301	71.4758	70.8319	71.5095	73.8679	73.1622	74.0294	73.998	72.1107	72.2955	88.9009	89.7652	88.9136	88.9508	74.4112	76.048	74.3607	73.0553	75.7452	76.3438	73.7495	75.7048
DRTY-6_201912_bins_46	69.9388	69.0228	69.3198	69.5706	70.4464	69.9523	69.9388	69.4456	69.8011	70.2426	69.5563	69.8618	72.0208	73.4075	71.7412	71.8116	71.8331	72.0208	72.9322	73.0116	73.1413	73.0784	69.9085	70.0399	69.8237	71.9754	71.9754	71.9888	70.342	70.1808	70.1742	73.5945	73.0358	73.4873	73.0866	72.2519	72.4318	89.2583	89.9269	89.2547	89.1793	73.1413	74.1606	75.4868	72.241	74.2094	74.1843	72.6858	72.636
DRTY-6_201907_bins_89	69.349	69.13	69.3824	69.298	70.5614	69.9414	69.349	69.1297	69.664	69.9749	69.3046	69.6997	71.949	72.391	71.9285	71.9434	71.9017	71.949	73.2306	73.2317	73.2472	73.1646	69.8882	69.8693	69.866	72.1207	72.1207	70.5923	70.2888	70.2363	70.038	72.4847	72.4692	72.5407	72.387	72.3965	72.5693	89.8638	90.4971	89.8584	89.9137	72.4387	72.8865	74.5177	72.5813	72.9477	72.9249	72.859	72.5792
SRBZ-1_202007_bins_91	69.8812	68.8615	69.3461	69.7466	70.3256	69.9253	69.8812	69.5852	69.9045	70.2235	69.6537	69.9618	71.9955	73.9328	71.6822	71.7354	71.7045	71.9955	72.9832	73.0718	73.135	73.0809	69.7775	69.9448	69.7343	72.1011	72.1011	72.0652	70.2541	70.0278	70.0493	73.6084	73.0878	73.4269	73.3446	72.2575	72.3837	89.3537	90.0627	89.3564	89.294	73.4313	74.6574	75.4337	72.35	74.6906	74.7879	72.6913	73.2203
SRBZ-1_201808_bins_25	69.5471	69.0124	69.364	69.3047	70.2508	69.7333	69.5471	69.1656	69.5278	69.9046	69.1942	69.4206	71.7955	72.2443	71.6664	71.7719	71.6748	71.7955	73.0209	73.0137	73.2229	73.0919	69.7203	69.8849	69.6918	71.8589	71.8589	70.2316	70.1159	70.1243	69.9322	72.3702	72.2606	71.9546	72.2169	72.0947	72.1438	89.7273	90.402	89.7059	89.7071	73.0399	72.3762	74.8015	72.2279	72.4992	72.5107	72.4212	72.3814
QQ_201709_bins_118	69.1655	68.5556	69.248	69.3411	70.1429	69.7767	69.1655	69.1929	69.5558	69.5979	69.0614	69.5125	71.8678	73.889	71.8444	71.8408	71.8109	71.8678	72.9809	72.9101	73.1154	73.0979	69.7044	69.8645	69.7275	72.1095	72.1095	71.5604	70.3565	69.9309	70.5228	73.6896	73.2002	73.5159	73.4475	72.2484	72.2985	89.4445	90.1124	89.4377	89.4242	73.5829	74.2883	75.0202	72.6689	74.1864	74.4169	72.774	73.102
QQ_201705_bins_21	69.899	69.1567	69.2791	69.7135	70.3576	69.8336	69.899	69.6563	69.712	70.3056	69.3843	69.8252	71.9199	74.0104	71.6763	71.7681	71.7078	71.9199	72.8701	72.9781	72.9976	72.9671	69.9605	70.1525	69.9235	72.026	72.026	73.1263	71.055	70.0577	70.188	73.7267	73.0905	73.8649	73.2516	72.2215	72.2233	89.1612	89.8014	89.1434	89.1623	73.4001	75.1413	74.8082	72.2788	75.0567	75.1376	72.5842	73.0632
SZTDM-1c_201709_bins_14	69.0878	69.3397	69.3302	69.295	70.1505	69.6733	69.0878	69.0928	69.4605	69.7548	69.0773	69.3975	71.74	72.3155	71.6126	71.7199	71.7579	71.74	72.8137	72.833	73.1086	73.0068	69.7095	69.8795	69.6843	71.9384	71.9384	70.0382	69.8112	69.7991	69.5593	72.4335	72.3802	72.3738	72.1591	71.9996	72.1023	89.4616	90.1512	89.4246	89.4255	72.883	72.4405	75.2651	72.3607	72.7881	72.7977	72.7425	72.5783
SRBZ-1_202007_bins_76	69.8798	70.0072	69.3515	69.3369	69.7745	69.8471	69.8798	69.5446	69.2081	69.7246	69.1159	68.7935	71.6111	72.1013	71.5299	71.5622	71.541	71.6111	74.7779	74.6959	74.8694	74.8221	70.6655	70.6986	70.6761	72.0598	72.0598	71.0156	71.1926	70.5159	70.9118	72.0929	71.9572	72.0921	72.0063	72.0076	71.9703	73.382	73.4627	73.3904	73.3657	72.2714	72.3882	72.124	72.4081	72.6712	72.7079	72.5087	72.5474
SRBZ-1_201901_bins_42	69.9733	69.987	69.2876	69.2639	69.9823	70.0203	69.9733	69.4394	69.3154	69.7945	69.1128	68.8834	71.7215	73.0838	71.7442	71.7625	71.709	71.7215	74.9842	74.8696	75.0026	74.9806	70.9204	70.9262	70.9255	72.4442	72.4442	70.9851	71.537	71.001	70.6129	72.765	72.6175	73.0151	72.148	72.2417	72.3179	73.6826	73.6795	73.6784	73.6939	73.2925	73.2151	72.5428	72.5118	73.0186	73.0179	72.8115	73.0073
SRBZ-1_201808_bins_41	70.0797	69.686	69.3692	69.6136	69.89	69.9925	70.0797	69.3971	69.3537	69.8688	69.2364	69.1607	71.6482	72.1216	71.5242	71.5441	71.5725	71.6482	74.7365	74.7061	74.8903	74.8818	70.784	70.8207	70.8093	72.1149	72.1149	71.203	71.2313	70.5933	70.503	72.2411	72.1201	71.9473	72.1354	72.165	72.0601	73.4775	73.5067	73.4759	73.4257	72.2173	72.4976	72.2776	72.1293	72.7804	72.7931	72.3181	72.2325
ZMQL_201709_bins_20	69.8992	69.4705	69.2423	69.541	69.9477	69.944	69.8992	69.7327	69.6604	69.9088	69.5286	69.2625	71.7211	72.1761	71.4985	71.6009	71.5329	71.7211	74.6725	74.7216	74.8533	74.8169	70.7549	70.6755	70.7222	72.0297	72.0297	71.0735	71.4871	70.6434	70.5634	72.2001	71.9902	71.7443	72.0811	72.1515	72.0656	73.6278	73.7514	73.6089	73.5921	72.1723	72.6355	72.148	72.1421	72.4553	72.5296	72.216	72.2616
SZTDM-1c_201709_bins_89	69.7277	69.7065	69.2912	69.4459	69.7786	69.7859	69.7277	69.2517	69.2738	69.6887	69.034	68.7257	71.6134	72.0013	71.6418	71.6548	71.5698	71.6134	74.789	74.772	74.8873	74.7786	70.7777	70.8138	70.7943	72.0398	72.0398	71.4644	72.4429	71.5722	71.563	72.0966	72.0399	72.1074	72.0318	72.0163	72.07	73.6271	73.6629	73.6321	73.4433	72.5888	72.8007	72.4011	72.5345	72.4195	72.4192	72.6592	72.5712
SZTDM-1b_201709_bins_14	69.9757	70.0352	69.2926	69.3218	69.8199	69.8829	69.9757	69.2908	69.0744	69.6762	68.8426	68.5916	71.5343	71.9555	71.5429	71.5237	71.4915	71.5343	74.7458	74.6508	74.9	74.8379	70.8144	70.8477	70.8222	72.1028	72.1028	70.5674	71.2812	70.5429	70.5284	72.0722	72.054	71.8114	71.9251	72.0122	72.0808	73.4925	73.5512	73.5095	73.4317	72.2894	72.3426	72.2899	72.2794	72.2776	72.3346	72.3826	72.2421
2_1_SS_W3_F1_Bin027_Water	70.1965	69.6758	70.5602	70.5919	72.469	70.9077	70.1965	70.0509	71.155	71.4749	70.3085	71.9379	70.3521	69.4064	70.3178	70.2419	70.3912	70.3521	69.6876	69.8465	68.4213	68.4493	68.7525	68.8055	68.7835	68.9514	68.9514	69.5208	69.4141	69.4556	69.4738	69.5676	69.5462	69.34	69.4813	70.1079	70.0669	71.0089	70.9975	70.9858	70.9188	69.2543	69.5513	69.3283	69.3993	69.5074	69.5305	69.2758	69.4304
S1_Bin_MAXBIN__075_sub_1	70.1441	69.587	69.851	69.8946	70.201	69.7989	70.1441	69.4696	69.7682	70.0425	69.586	69.6097	71.7407	72.3956	71.6886	71.6693	71.695	71.7407	72.8118	72.8012	73.2578	73.1435	69.9403	69.9678	69.9178	72.2452	72.2452	70.3858	70.3194	70.2785	70.2371	72.4743	72.4543	72.2802	72.433	72.0364	72.1331	81.2457	81.2441	81.2384	81.2955	72.3111	72.3721	72.7824	72.2513	72.3889	72.3984	72.3902	72.3646
[truncated: 58 more columns]
