# Supplementary material for: Direct utilization of long-chain fatty acid for methane production by thermophilic Archaeoglobi
Source: Research Square preprint supplement (doi:10.21203/rs.3.rs-7873196/v1), 2025-10-24
Supplement: Supplementary file 4 [file 99eef6e8ef88bf3c8f8c3bc3.xlsx]

## Sheet: Sheet1
Supplementary Table 6 Properties of MAGs of in the genus Ca. Melinoarchaeum. Show their source, classification, completeness, contamination and gene number for beta oxidation, methyltransferase, WLP, methanogenesis and energy metabolism.
bin id	accession	gtdb_taxonomy	checkm_completeness	checkm_contamination	genome_size	GC_percentage	Geographic location	ncbi_isolation_source	acsl	acadm	crt	paaF	fadB	fadA	acat	mtaA	mtaB	mtaC	mtbA	mtbB	mtbC	mtmB	mtmC	mttB	mttC	cdhA	cdhB	cdhC	cdhD	cdhE	mer	met	mtd	mch	ftr	fwdA	fwdB	fwdC	fwdD	fwdF	fwdG	ACSS	mtrA	mtrB	mtrC	mtrD	mtrE	mtrF	mtrH
2_1_SS_W3_F1_Bin027_Water	GCA_040514265.1	d__Archaea;p__Halobacteriota;c__Archaeoglobi;o__Archaeoglobales;f__Archaeoglobaceae;g__WYZ-LMO2;s__WYZ-LMO2 sp040514265	99.35	0	1377565	53.7678	Philippines	water from Submarine Groundwater Discharge (SGD) at 7 m depth	2	0	1	0	3	3	9	0	0	0	0	0	1	0	0	0	0	2	2	2	1	1	2	1	1	1	2	1	2	1	1	2	1	1	0	0	0	0	0	0	1
SKYB32	GCA_025058735.1	d__Archaea;p__Halobacteriota;c__Archaeoglobi;o__Archaeoglobales;f__Archaeoglobaceae;g__WYZ-LMO2;s__WYZ-LMO2 sp025058735	98.37	0	1222266	35.8721	Malaysia: Sungkai, Perak	brown biofilm from alkaline hot spring	1	1	1	0	2	2	8	0	0	0	0	0	0	0	0	0	0	2	2	1	1	1	2	1	1	1	2	1	2	1	1	1	1	2	0	0	0	0	0	0	0
SKW111	GCA_026414505.1	d__Archaea;p__Halobacteriota;c__Archaeoglobi;o__Archaeoglobales;f__Archaeoglobaceae;g__WYZ-LMO2;s__WYZ-LMO2 sp025058735	99.02	0	1255829	35.8519	Malaysia: Sungkai, Perak	alkaline hot spring water	2	4	1	0	2	2	12	0	0	0	0	0	0	0	0	0	0	2	2	1	1	1	3	1	1	1	2	1	2	1	1	1	1	2	0	0	0	0	0	0	0
SKYBB_h_bin44	GCA_033582095.1	d__Archaea;p__Halobacteriota;c__Archaeoglobi;o__Archaeoglobales;f__Archaeoglobaceae;g__WYZ-LMO2;s__WYZ-LMO2 sp025058735	99.02	0	1229028	35.9019	Malaysia: Sungkai, Perak	hot spring microbial mat	1	1	1	0	2	2	8	0	0	0	0	0	0	0	0	0	0	2	2	1	1	1	2	1	1	1	2	1	2	1	1	1	1	2	0	0	0	0	0	0	0
JZ_75_SW_bin_109	GCA_030055525.1	d__Archaea;p__Halobacteriota;c__Archaeoglobi;o__Archaeoglobales;f__Archaeoglobaceae;g__WYZ-LMO2;s__WYZ-LMO2 sp030055525	99.35	0.65	1561888	39.4892	China: Tengchong county, Yunnan, JinZe-3 pool	enrichment culture inoculated with sediment from JinZe-3 pool was maintained at 75 degree	5	1	1	0	7	1	7	2	1	1	0	0	4	0	0	0	0	1	1	1	1	1	3	1	1	1	2	1	2	1	1	1	1	0	1	1	1	1	1	1	2
DRC_201705_bins_99	GCA_038735165.1	d__Archaea;p__Halobacteriota;c__Archaeoglobi;o__Archaeoglobales;f__Archaeoglobaceae;g__WYZ-LMO2;s__WYZ-LMO2 sp030055525	84.84	1.96	1264373	39.39	China: Tengchong county, Yunnan, DRC pool	Hot spring sediment	2	0	1	0	4	1	8	2	1	1	0	0	2	0	0	0	0	1	1	1	2	1	3	1	1	1	2	2	2	1	1	1	1	0	1	1	1	1	1	1	2
SRBZ-1_201901_bins_28	GCA_038887895.1	d__Archaea;p__Halobacteriota;c__Archaeoglobi;o__Archaeoglobales;f__Archaeoglobaceae;g__WYZ-LMO2;s__WYZ-LMO2 sp030055525	94.23	0	1359836	39.3969	China: Tengchong county, Yunnan, SRBZ-1 pool	Hot spring sediment	4	0	1	0	4	1	6	2	1	1	0	0	3	0	0	0	0	1	1	1	1	1	3	1	1	1	2	1	2	0	1	1	1	0	1	1	1	1	1	1	2
GXS_202101_bins_42	GCA_038827655.1	d__Archaea;p__Halobacteriota;c__Archaeoglobi;o__Archaeoglobales;f__Archaeoglobaceae;g__WYZ-LMO2;s__WYZ-LMO2 sp030055525	86.54	0	1151343	39.455	China: Tengchong county, Yunnan, GXS pool	Hot spring sediment	2	1	1	0	5	0	7	2	1	1	0	0	1	0	0	0	0	2	1	1	1	1	3	1	1	1	2	1	2	1	1	1	0	0	1	1	1	1	1	1	3
DJKA76_ANT21_bin.13	GCA_030153635.1	d__Archaea;p__Halobacteriota;c__Archaeoglobi;o__Archaeoglobales;f__Archaeoglobaceae;g__WYZ-LMO2;s__WYZ-LMO2 sp030153385	96.08	0.65	1450574	43.2285	USA: Colorado	Produced fluids from hydraulically fractured shales	3	1	2	0	6	3	7	2	2	1	0	0	0	0	0	0	0	2	1	1	1	1	1	1	1	1	2	1	2	1	1	1	1	0	1	1	1	1	1	1	1
DJKA128_NP-F35_bin.22	GCA_030153385.1	d__Archaea;p__Halobacteriota;c__Archaeoglobi;o__Archaeoglobales;f__Archaeoglobaceae;g__WYZ-LMO2;s__WYZ-LMO2 sp030153385	96	1.31	1401409	43.3864	USA: Colorado	Produced fluids from hydraulically fractured shales	4	1	1	1	5	2	8	2	1	1	0	0	1	0	0	0	0	1	1	1	1	1	1	1	1	2	3	1	2	1	1	1	1	0	1	1	1	1	1	1	2
WYZ-LMO2	GCA_004347865.1	d__Archaea;p__Halobacteriota;c__Archaeoglobi;o__Archaeoglobales;f__Archaeoglobaceae;g__WYZ-LMO2;s__WYZ-LMO2 sp004347865	97.6	0	1514415	45.9191	USA:Yellowstone National Park, Wyoming, USA	hot springs sediment	5	1	1	0	4	3	8	0	0	0	0	0	0	0	0	0	0	2	1	1	1	1	1	1	1	1	0	1	2	1	1	1	1	0	1	1	1	1	1	0	1
LCB024-003	GCA_024437945.1	d__Archaea;p__Halobacteriota;c__Archaeoglobi;o__Archaeoglobales;f__Archaeoglobaceae;g__WYZ-LMO2;s__WYZ-LMO2 sp004347865	88.48	1.31	1156727	45.72	USA: Yellowstone National Park, WY	hot spring sediment	4	0	2	0	5	3	8	0	0	0	0	0	0	0	0	0	0	2	2	1	0	0	1	1	1	1	1	1	2	1	0	1	1	0	0	0	0	0	0	0	1
SJ3.Bin34	GCA_011605875.1	d__Archaea;p__Halobacteriota;c__Archaeoglobi;o__Archaeoglobales;f__Archaeoglobaceae;g__WYZ-LMO2;s__WYZ-LMO2 sp004347865	98.69	0.65	1467518	46.0002	USA: Yellowstone National Park; Smokejumper3 Hot Spring	sediments from hot spring shelf	8	1	2	0	5	3	8	0	0	0	0	0	0	0	0	0	0	1	1	1	1	1	1	1	1	1	2	1	2	1	1	1	1	0	1	1	1	1	1	0	1
LCB24	GCA_036867765.1	d__Archaea;p__Halobacteriota;c__Archaeoglobi;o__Archaeoglobales;f__Archaeoglobaceae;g__WYZ-LMO2;s__WYZ-LMO2 sp004347865	100	1.31	1623778	45.8906	USA: Yellowstone National Park, Wyoming	LCB024 hot spring enrichment 1AT1b T4-MG and 6F SIT-MG	6	1	2	0	6	3	8	1	0	0	0	2	1	3	0	3	1	2	2	1	1	1	1	1	1	1	2	1	2	1	1	1	1	0	1	1	1	1	1	1	1
Methanoglobus hypatiae LCB24	Methanoglobus hypatiae LCB24	d__Archaea;p__Halobacteriota;c__Archaeoglobi;o__Archaeoglobales;f__Archaeoglobaceae;g__WYZ-LMO2;s__WYZ-LMO2 sp004347865	100	1.31	1623778	45.8906	USA: Yellowstone National Park, Wyoming	hot spring	6	1	2	0	6	3	8	1	0	0	0	2	1	3	0	3	1	2	2	1	1	1	1	1	1	1	2	1	2	1	1	1	1	0	1	1	1	1	1	1	1
GMQP_D_bin_18	GCA_030055415.1	d__Archaea;p__Halobacteriota;c__Archaeoglobi;o__Archaeoglobales;f__Archaeoglobaceae;g__WYZ-LMO2;s__WYZ-LMO2 sp030055595	97.39	0.98	1564635	42.0304	China: Tengchong county, Yunnan, GuMingQuan pool	hot spring sediment	4	1	2	0	6	1	6	1	1	1	0	0	0	0	0	0	0	2	2	1	1	1	1	1	1	1	2	1	2	1	1	1	1	1	1	1	1	1	1	1	1
HHBFW-2_201803_bins_10	GCA_038827315.1	d__Archaea;p__Halobacteriota;c__Archaeoglobi;o__Archaeoglobales;f__Archaeoglobaceae;g__WYZ-LMO2;s__WYZ-LMO2 sp030055595	63.11	0.33	1061327	41.6781	China: Tengchong county, Yunnan, HHBFW-2 pool	Hot spring sediment	3	1	2	0	5	1	5	0	0	1	0	0	1	0	0	0	0	1	1	1	1	1	1	1	0	1	1	1	2	1	1	1	1	0	1	1	1	1	1	1	2
JZ-3_D_bin_138	GCA_030055595.1	d__Archaea;p__Halobacteriota;c__Archaeoglobi;o__Archaeoglobales;f__Archaeoglobaceae;g__WYZ-LMO2;s__WYZ-LMO2 sp030055595	99.35	1.31	1550087	42.0814	China: Tengchong county, Yunnan, JinZe-3 pool	hot spring sediment	4	1	2	1	5	1	6	1	1	1	0	0	1	0	0	0	0	2	2	1	1	1	2	1	1	1	2	1	2	1	1	1	1	1	1	1	1	1	1	1	2
JZ-3_201705_bins_59	GCA_038886345.1	d__Archaea;p__Halobacteriota;c__Archaeoglobi;o__Archaeoglobales;f__Archaeoglobaceae;g__WYZ-LMO2;s__WYZ-LMO2 sp030055595	89.71	2.31	1305072	42.0297	China: Tengchong county, Yunnan, JZ-3 pool	Hot spring sediment	6	1	2	0	6	1	5	0	0	0	0	0	0	0	0	0	0	2	0	1	1	1	1	1	0	0	2	1	2	1	1	1	1	1	0	0	0	0	0	0	0
JZ-2_202101_bins_110	GCA_038868795.1	d__Archaea;p__Halobacteriota;c__Archaeoglobi;o__Archaeoglobales;f__Archaeoglobaceae;g__WYZ-LMO2;s__WYZ-LMO2 sp038734275	73.62	0.68	1041378	41.0148	China: Tengchong county, Yunnan, JZ-2 pool	Hot spring sediment	4	0	2	0	4	4	7	0	0	0	0	0	1	0	0	0	0	2	0	1	1	1	1	0	0	1	2	1	1	1	1	1	0	0	0	0	0	0	0	0	1
ZZQ_201803_bins_86	GCA_038817355.1	d__Archaea;p__Halobacteriota;c__Archaeoglobi;o__Archaeoglobales;f__Archaeoglobaceae;g__WYZ-LMO2;s__WYZ-LMO2 sp038734275	92.81	1.31	1305143	41.231	China: Tengchong county, Yunnan, ZZQ pool	Hot spring sediment	6	0	2	1	5	3	8	0	1	1	0	0	1	0	0	0	0	2	1	1	1	1	1	1	1	1	2	1	2	1	1	1	1	2	1	1	1	1	2	1	2
JZ-1_202101_bins_129	GCA_038855655.1	d__Archaea;p__Halobacteriota;c__Archaeoglobi;o__Archaeoglobales;f__Archaeoglobaceae;g__WYZ-LMO2;s__WYZ-LMO2 sp038734275	67.97	0.65	1265244	41.9533	China: Tengchong county, Yunnan, JZ-1 pool	Hot spring sediment	5	2	3	1	5	4	17	0	0	0	0	0	1	0	0	0	0	2	0	1	1	1	0	0	1	1	2	1	2	0	1	1	1	1	1	1	1	1	1	1	2
JZ-1_201901_bins_117	GCA_038867515.1	d__Archaea;p__Halobacteriota;c__Archaeoglobi;o__Archaeoglobales;f__Archaeoglobaceae;g__WYZ-LMO2;s__WYZ-LMO2 sp038734275	86.22	0	1150249	41.0926	China: Tengchong county, Yunnan, JZ-1 pool	Hot spring sediment	6	0	2	1	4	3	7	0	1	1	0	0	1	0	0	0	0	2	2	1	0	1	0	1	1	1	2	1	2	1	1	1	1	0	1	1	1	1	1	1	2
JZ-1_201709_bins_122	GCA_038842045.1	d__Archaea;p__Halobacteriota;c__Archaeoglobi;o__Archaeoglobales;f__Archaeoglobaceae;g__WYZ-LMO2;s__WYZ-LMO2 sp038734275	86.93	0.33	1296104	41.4056	China: Tengchong county, Yunnan, JZ-1 pool	Hot spring sediment	5	0	2	1	6	4	9	0	0	0	0	0	1	0	0	0	0	1	1	1	1	1	1	1	1	1	2	1	2	1	1	1	1	0	0	0	0	0	1	0	2
DRC_201705_bins_46	GCA_038735825.1	d__Archaea;p__Halobacteriota;c__Archaeoglobi;o__Archaeoglobales;f__Archaeoglobaceae;g__WYZ-LMO2;s__WYZ-LMO2 sp038734275	80.72	1.31	1272714	41.3468	China: Tengchong county, Yunnan, DRC pool	Hot spring sediment	6	0	3	0	7	1	7	1	2	0	0	0	1	0	0	0	0	1	0	2	1	1	1	1	1	2	2	1	2	1	1	1	1	2	1	1	1	1	1	1	2
SRBZ-2_201803_bins_23	GCA_038895815.1	d__Archaea;p__Halobacteriota;c__Archaeoglobi;o__Archaeoglobales;f__Archaeoglobaceae;g__WYZ-LMO2;s__WYZ-LMO2 sp038734275	89.51	1.63	1541081	41.2308	China: Tengchong county, Yunnan, SRBZ-2 pool	Hot spring sediment	5	1	2	1	5	3	8	1	1	1	0	0	1	0	0	0	0	2	2	1	1	1	1	1	0	1	2	0	2	0	1	1	1	1	1	1	1	1	1	1	2
JZ-1_201803_bins_92	GCA_038867855.1	d__Archaea;p__Halobacteriota;c__Archaeoglobi;o__Archaeoglobales;f__Archaeoglobaceae;g__WYZ-LMO2;s__WYZ-LMO2 sp038734275	84.97	0.65	1038635	41.0811	China: Tengchong county, Yunnan, JZ-1 pool	Hot spring sediment	4	0	2	1	6	3	8	1	1	1	0	0	1	0	0	0	0	1	1	1	1	1	1	0	1	0	2	0	1	0	0	1	1	1	0	0	0	0	0	0	1
JZ-1_201705_bins_34	GCA_038845375.1	d__Archaea;p__Halobacteriota;c__Archaeoglobi;o__Archaeoglobales;f__Archaeoglobaceae;g__WYZ-LMO2;s__WYZ-LMO2 sp038734275	98.04	1.31	1905668	40.8845	China: Tengchong county, Yunnan, JZ-1 pool	Hot spring sediment	6	0	2	1	5	4	9	1	1	1	0	0	1	0	0	0	0	2	1	1	1	1	1	1	1	1	2	1	2	1	1	1	1	4	1	1	1	1	1	1	2
JZ-1_202007_bins_63	GCA_038857365.1	d__Archaea;p__Halobacteriota;c__Archaeoglobi;o__Archaeoglobales;f__Archaeoglobaceae;g__WYZ-LMO2;s__WYZ-LMO2 sp038734275	95.42	0.65	1432738	41.3269	China: Tengchong county, Yunnan, JZ-1 pool	Hot spring sediment	6	0	2	1	5	4	9	1	1	1	0	0	1	0	0	0	0	3	2	1	1	1	0	1	1	1	2	1	2	0	1	1	1	1	1	1	1	1	1	1	2
JZ-1_201912_bins_57	GCA_038860655.1	d__Archaea;p__Halobacteriota;c__Archaeoglobi;o__Archaeoglobales;f__Archaeoglobaceae;g__WYZ-LMO2;s__WYZ-LMO2 sp038734275	81.05	0	1089389	41.1264	China: Tengchong county, Yunnan, JZ-1 pool	Hot spring sediment	5	0	0	1	3	3	8	0	0	0	0	0	1	0	0	0	0	1	0	1	1	1	1	0	1	2	2	1	2	1	1	1	1	0	0	1	1	1	1	0	2
SKYB18	GCA_025058955.1	d__Archaea;p__Halobacteriota;c__Archaeoglobi;o__Archaeoglobales;f__Archaeoglobaceae;g__WYZ-LMO2;s__WYZ-LMO2 sp025058955	84.02	0	1089245	40.1291	Malaysia: Sungkai, Perak	brown biofilm from alkaline hot spring	3	0	3	0	5	1	4	0	0	0	0	0	1	0	0	0	0	2	1	1	1	0	1	0	1	0	0	0	2	0	1	2	1	1	0	0	0	0	0	0	1
SKYBB_i_bin18	GCA_033580105.1	d__Archaea;p__Halobacteriota;c__Archaeoglobi;o__Archaeoglobales;f__Archaeoglobaceae;g__WYZ-LMO2;s__WYZ-LMO2 sp025058955	84.02	0	1089245	40.1291	Malaysia: Sungkai, Perak	hot spring microbial mat	3	0	3	0	5	1	4	0	0	0	0	0	1	0	0	0	0	2	1	1	1	0	1	0	1	0	0	0	2	0	1	2	1	1	0	0	0	0	0	0	1
ZMQR_201912_bins_18	GCA_038897615.1	d__Archaea;p__Halobacteriota;c__Archaeoglobi;o__Archaeoglobales;f__Archaeoglobaceae;g__WYZ-LMO2;s__WYZ-LMO2 sp038734275	92.33	2.34	1535658	41.3155	China: Tengchong county, Yunnan, ZMQR pool	Hot spring sediment	6	1	2	1	6	3	8	1	1	1	0	0	1	0	0	0	0	3	2	1	2	1	1	1	1	1	2	1	2	1	1	2	1	1	1	1	2	1	1	1	2
SRBZ-1_201808_bins_76	GCA_038888215.1	d__Archaea;p__Halobacteriota;c__Archaeoglobi;o__Archaeoglobales;f__Archaeoglobaceae;g__WYZ-LMO2;s__WYZ-LMO2 sp038734275	92.81	1.63	1427232	41.3717	China: Tengchong county, Yunnan, SRBZ-1 pool	Hot spring sediment	8	1	4	1	5	3	9	1	1	1	0	0	1	0	0	0	0	2	1	1	1	1	1	1	1	1	2	1	2	1	1	1	1	1	1	1	1	1	1	1	2
SZTDM-1c_201709_bins_50	GCA_038894635.1	d__Archaea;p__Halobacteriota;c__Archaeoglobi;o__Archaeoglobales;f__Archaeoglobaceae;g__WYZ-LMO2;s__WYZ-LMO2 sp038734275	98.69	0.98	1477870	41.4639	China: Tengchong county, Yunnan, SZTDM-1c pool	Hot spring sediment	6	1	2	1	5	3	9	1	1	1	0	0	1	0	0	0	0	3	2	1	1	1	1	1	1	1	2	1	3	1	1	1	1	1	1	1	1	1	1	1	2
SRBZ-1_201901_bins_46	GCA_038887715.1	d__Archaea;p__Halobacteriota;c__Archaeoglobi;o__Archaeoglobales;f__Archaeoglobaceae;g__WYZ-LMO2;s__WYZ-LMO2 sp038734275	80.2	1.31	1126998	41.1576	China: Tengchong county, Yunnan, SRBZ-1 pool	Hot spring sediment	5	0	1	1	5	2	7	1	0	1	0	0	1	0	0	0	0	2	1	1	1	1	0	0	1	1	2	1	1	0	1	0	0	1	1	1	1	1	1	1	2
GMQP_201705_bins_55	GCA_038823695.1	d__Archaea;p__Halobacteriota;c__Archaeoglobi;o__Archaeoglobales;f__Archaeoglobaceae;g__WYZ-LMO2;s__WYZ-LMO2 sp038734275	100	1.63	2511682	40.5579	China: Tengchong county, Yunnan, GMQP pool	Hot spring sediment	8	1	3	1	6	3	8	1	1	1	0	0	1	0	0	0	0	2	2	1	1	1	1	1	1	1	2	1	2	1	1	1	1	1	1	1	1	1	1	1	2
GMQP_201808_bins_54	GCA_038820925.1	d__Archaea;p__Halobacteriota;c__Archaeoglobi;o__Archaeoglobales;f__Archaeoglobaceae;g__WYZ-LMO2;s__WYZ-LMO2 sp038734275	98.67	1.63	1667841	41.3364	China: Tengchong county, Yunnan, GMQP pool	Hot spring sediment	7	1	3	1	6	3	8	1	1	1	0	0	1	0	0	0	0	2	2	1	0	0	1	1	1	1	2	1	2	1	1	1	1	1	1	1	1	1	1	1	2
DRTY-1_201808_bins_14	GCA_038734275.1	d__Archaea;p__Halobacteriota;c__Archaeoglobi;o__Archaeoglobales;f__Archaeoglobaceae;g__WYZ-LMO2;s__WYZ-LMO2 sp038734275	100	1.31	1729305	41.2939	China: Tengchong county, Yunnan, DRTY-1 pool	Hot spring sediment	6	1	2	1	5	3	8	1	1	1	0	0	1	0	0	0	0	2	2	1	1	1	1	1	1	1	2	1	2	1	1	1	1	1	1	1	1	1	1	1	2
DRTY-1_201901_bins_37	GCA_038731945.1	d__Archaea;p__Halobacteriota;c__Archaeoglobi;o__Archaeoglobales;f__Archaeoglobaceae;g__WYZ-LMO2;s__WYZ-LMO2 sp038734275	96.08	0.98	1361744	41.4222	China: Tengchong county, Yunnan, DRTY-1 pool	Hot spring sediment	8	2	3	1	6	3	11	1	1	1	0	0	1	0	0	0	0	1	2	1	1	1	1	1	1	1	1	1	2	1	1	1	1	1	1	1	1	1	1	1	2
JZ-1_202101_bins_85	GCA_038854445.1	d__Archaea;p__Halobacteriota;c__Archaeoglobi;o__Archaeoglobales;f__Archaeoglobaceae;g__WYZ-LMO2;s__WYZ-LMO2 sp038866255	89.19	0.33	1179939	40.3969	China: Tengchong county, Yunnan, JZ-1 pool	Hot spring sediment	2	0	1	0	4	3	4	0	0	0	0	0	0	0	0	0	0	2	0	1	1	2	3	1	1	1	2	1	2	1	1	1	1	2	0	0	0	0	0	0	0
JZ-1_201912_bins_103	GCA_038862865.1	d__Archaea;p__Halobacteriota;c__Archaeoglobi;o__Archaeoglobales;f__Archaeoglobaceae;g__WYZ-LMO2;s__WYZ-LMO2 sp038866255	96.47	0	1251695	40.765	China: Tengchong county, Yunnan, JZ-1 pool	Hot spring sediment	3	2	1	0	5	3	12	0	0	0	0	0	0	0	0	0	0	2	1	1	1	2	3	1	1	1	1	1	2	1	1	1	1	2	0	0	0	0	0	0	0
ZZQ_201803_bins_85	GCA_038817525.1	d__Archaea;p__Halobacteriota;c__Archaeoglobi;o__Archaeoglobales;f__Archaeoglobaceae;g__WYZ-LMO2;s__WYZ-LMO2 sp038866255	91.83	0	1164163	40.7585	China: Tengchong county, Yunnan, ZZQ pool	Hot spring sediment	3	1	2	0	4	2	8	0	0	0	0	0	0	0	0	0	0	1	1	1	1	2	2	1	1	1	1	2	2	1	1	1	1	0	0	0	0	0	0	0	0
JZ-1_201803_bins_18	GCA_038840495.1	d__Archaea;p__Halobacteriota;c__Archaeoglobi;o__Archaeoglobales;f__Archaeoglobaceae;g__WYZ-LMO2;s__WYZ-LMO2 sp038866255	93.14	0.33	1495402	40.6856	China: Tengchong county, Yunnan, JZ-1 pool	Hot spring sediment	4	2	2	0	4	3	12	0	0	0	0	0	0	0	0	0	0	2	1	1	1	2	4	1	1	2	2	2	3	2	2	1	1	0	1	1	1	1	1	1	1
JZ-1_201901_bins_60	GCA_038866255.1	d__Archaea;p__Halobacteriota;c__Archaeoglobi;o__Archaeoglobales;f__Archaeoglobaceae;g__WYZ-LMO2;s__WYZ-LMO2 sp038866255	97.39	0	1262644	40.779	China: Tengchong county, Yunnan, JZ-1 pool	Hot spring sediment	3	2	2	0	4	3	10	0	0	0	0	0	0	0	0	0	0	2	1	1	1	2	3	1	1	1	2	1	2	1	1	1	1	2	0	0	0	0	0	0	0
JZ-1_202007_bins_10	GCA_038859435.1	d__Archaea;p__Halobacteriota;c__Archaeoglobi;o__Archaeoglobales;f__Archaeoglobaceae;g__WYZ-LMO2;s__WYZ-LMO2 sp038866255	92.43	0	1204391	40.7355	China: Tengchong county, Yunnan, JZ-1 pool	Hot spring sediment	3	1	2	0	4	3	10	0	0	0	0	0	0	0	0	0	0	1	1	1	1	2	2	1	1	1	2	1	2	1	1	1	1	0	0	0	0	0	0	0	0
JZ-1_201705_bins_16	GCA_038845885.1	d__Archaea;p__Halobacteriota;c__Archaeoglobi;o__Archaeoglobales;f__Archaeoglobaceae;g__WYZ-LMO2;s__WYZ-LMO2 sp038866255	94.12	0	1302854	40.7892	China: Tengchong county, Yunnan, JZ-1 pool	Hot spring sediment	4	2	2	0	4	3	12	0	0	0	0	0	0	0	0	0	0	2	1	1	1	2	3	1	1	1	2	1	2	1	1	1	1	0	0	0	0	0	0	0	0
JZ-2_202101_bins_99	GCA_038868155.1	d__Archaea;p__Halobacteriota;c__Archaeoglobi;o__Archaeoglobales;f__Archaeoglobaceae;g__WYZ-LMO2;s__WYZ-LMO2 sp038866255	94.12	0	1196955	40.6649	China: Tengchong county, Yunnan, JZ-2 pool	Hot spring sediment	4	1	1	0	5	3	9	0	0	0	0	0	0	0	0	0	0	2	1	1	1	2	3	1	1	1	2	1	2	0	1	1	1	3	0	0	0	0	0	0	0
JZ-1_201709_bins_58	GCA_038841395.1	d__Archaea;p__Halobacteriota;c__Archaeoglobi;o__Archaeoglobales;f__Archaeoglobaceae;g__WYZ-LMO2;s__WYZ-LMO2 sp038866255	98.69	0.65	1271464	40.7792	China: Tengchong county, Yunnan, JZ-1 pool	Hot spring sediment	3	2	2	0	4	3	12	0	0	0	0	0	0	0	0	0	0	2	1	1	1	2	3	1	1	1	2	1	2	1	1	1	1	0	0	0	0	0	0	0	0
SKYB47	GCA_025057895.1	d__Archaea;p__Halobacteriota;c__Archaeoglobi;o__Archaeoglobales;f__Archaeoglobaceae;g__WYZ-LMO2;s__WYZ-LMO2 sp025057895	85.62	0	1014292	37.104	Malaysia: Sungkai, Perak	brown biofilm from alkaline hot spring	0	1	2	0	1	1	5	0	0	0	0	0	0	0	0	0	0	2	2	0	0	0	2	1	1	1	1	1	2	1	1	0	1	1	0	0	0	0	0	0	0
SKYBB_h_bin31	GCA_033582135.1	d__Archaea;p__Halobacteriota;c__Archaeoglobi;o__Archaeoglobales;f__Archaeoglobaceae;g__WYZ-LMO2;s__WYZ-LMO2 sp025057895	97.39	0.65	1307764	37.0803	Malaysia: Sungkai, Perak	hot spring microbial mat	1	2	2	0	1	1	8	0	0	0	0	0	0	0	0	0	0	2	2	1	1	1	3	1	1	1	2	2	2	1	1	2	1	2	0	0	0	0	0	0	0
Bin S27	GCA_020833165.1	d__Archaea;p__Halobacteriota;c__Archaeoglobi;o__Archaeoglobales;f__Archaeoglobaceae;g__WYZ-LMO2;s__WYZ-LMO2 sp011605865	100	0.98	1399988	42.3884	USA: Yellowstone National Park, GGS063 Spring	sediments from shelf	4	1	2	0	5	3	9	0	0	0	0	0	0	0	0	0	0	2	2	1	1	2	4	1	1	1	2	1	2	1	1	1	1	1	0	0	0	0	0	0	0
SJ3.Bin61	GCA_011605865.1	d__Archaea;p__Halobacteriota;c__Archaeoglobi;o__Archaeoglobales;f__Archaeoglobaceae;g__WYZ-LMO2;s__WYZ-LMO2 sp011605865	89.54	0	1269726	41.6795	USA: Yellowstone National Park; Smokejumper3 Hot Spring	sediments from hot spring shelf	5	1	2	0	4	3	9	0	0	0	0	0	0	0	0	0	0	2	2	1	1	2	4	1	1	1	2	1	2	1	1	1	1	1	0	0	0	0	0	0	0
ZMQL_201709_bins_20	GCA_038893835.1	d__Archaea;p__Halobacteriota;c__Archaeoglobi;o__Archaeoglobales;f__Archaeoglobaceae;g__WYZ-LMO2;s__WYZ-LMO2 sp038893835	95.4	0	1169739	40.0088	China: Tengchong county, Yunnan, ZMQL pool	Hot spring sediment	1	1	2	0	2	2	8	0	0	0	0	0	0	0	0	0	0	1	1	1	1	2	3	1	1	1	2	1	2	1	1	2	1	2	0	0	0	0	0	0	0
SRBZ-1_202007_bins_76	GCA_038886755.1	d__Archaea;p__Halobacteriota;c__Archaeoglobi;o__Archaeoglobales;f__Archaeoglobaceae;g__WYZ-LMO2;s__WYZ-LMO2 sp038893835	96.08	0.98	1107616	39.9276	China: Tengchong county, Yunnan, SRBZ-1 pool	Hot spring sediment	1	1	2	0	2	3	10	0	0	0	0	0	0	0	0	0	0	1	1	1	1	2	3	1	1	1	2	1	3	1	1	1	1	1	0	0	0	0	0	0	0
SZTDM-1b_201709_bins_14	GCA_038895115.1	d__Archaea;p__Halobacteriota;c__Archaeoglobi;o__Archaeoglobales;f__Archaeoglobaceae;g__WYZ-LMO2;s__WYZ-LMO2 sp038893835	98.04	0.65	1164600	39.9251	China: Tengchong county, Yunnan, SZTDM-1b pool	Hot spring sediment	1	1	1	0	2	1	8	0	0	0	0	0	0	0	0	0	0	2	1	1	1	2	3	1	1	1	1	1	2	1	1	2	1	2	0	0	0	0	0	0	0
SRBZ-1_201808_bins_41	GCA_038888595.1	d__Archaea;p__Halobacteriota;c__Archaeoglobi;o__Archaeoglobales;f__Archaeoglobaceae;g__WYZ-LMO2;s__WYZ-LMO2 sp038893835	100	0	1190296	39.933	China: Tengchong county, Yunnan, SRBZ-1 pool	Hot spring sediment	1	1	2	0	2	2	8	0	0	0	0	0	0	0	0	0	0	1	1	1	1	2	3	1	1	1	2	1	2	1	1	2	1	2	0	0	0	0	0	0	0
SZTDM-1c_201709_bins_89	GCA_038894395.1	d__Archaea;p__Halobacteriota;c__Archaeoglobi;o__Archaeoglobales;f__Archaeoglobaceae;g__WYZ-LMO2;s__WYZ-LMO2 sp038893835	72.75	0.84	851151	40.0251	China: Tengchong county, Yunnan, SZTDM-1c pool	Hot spring sediment	1	1	2	0	2	2	6	0	0	0	0	0	0	0	0	0	0	1	1	1	2	1	3	1	1	1	1	1	2	1	1	2	1	1	0	0	0	0	0	0	0
SRBZ-1_201901_bins_42	GCA_038887755.1	d__Archaea;p__Halobacteriota;c__Archaeoglobi;o__Archaeoglobales;f__Archaeoglobaceae;g__WYZ-LMO2;s__WYZ-LMO2 sp038893835	80.24	1.47	1010456	39.9912	China: Tengchong county, Yunnan, SRBZ-1 pool	Hot spring sediment	1	1	2	0	4	4	9	0	0	0	0	0	0	0	0	0	0	1	1	1	1	3	4	2	1	1	2	2	2	1	1	2	0	2	0	0	0	0	0	0	0
HHBFW-2_201803_bins_77	GCA_038825315.1	d__Archaea;p__Halobacteriota;c__Archaeoglobi;o__Archaeoglobales;f__Archaeoglobaceae;g__WYZ-LMO2;s__WYZ-LMO2 sp038882935	90.85	1.96	1367847	44.7236	China: Tengchong county, Yunnan, HHBFW-2 pool	Hot spring sediment	4	3	2	0	3	2	13	0	0	0	0	0	1	0	0	0	0	1	1	1	1	2	3	1	1	1	2	1	2	1	1	1	1	2	0	0	0	0	0	0	1
DRTY-6_201705_bins_205	GCA_038874515.1	d__Archaea;p__Halobacteriota;c__Archaeoglobi;o__Archaeoglobales;f__Archaeoglobaceae;g__WYZ-LMO2;s__WYZ-LMO2 sp038882935	68.01	0.65	970467	44.7909	China: Tengchong county, Yunnan, DRTY-6 pool	Hot spring sediment	3	3	2	0	3	1	10	0	0	0	0	0	0	0	0	0	0	1	0	1	1	2	2	1	0	1	1	0	2	0	0	2	1	0	0	0	0	0	0	0	0
DRTY-2_201901_bins_58	GCA_038728225.1	d__Archaea;p__Halobacteriota;c__Archaeoglobi;o__Archaeoglobales;f__Archaeoglobaceae;g__WYZ-LMO2;s__WYZ-LMO2 sp038882935	91.51	0.65	1390016	44.6316	China: Tengchong county, Yunnan, DRTY-2 pool	Hot spring sediment	5	2	2	0	3	1	11	0	0	0	0	0	2	0	0	0	0	2	1	1	1	2	4	1	1	0	1	1	2	1	1	2	1	1	0	0	0	0	0	0	1
GXS_202101_bins_35	GCA_038827955.1	d__Archaea;p__Halobacteriota;c__Archaeoglobi;o__Archaeoglobales;f__Archaeoglobaceae;g__WYZ-LMO2;s__WYZ-LMO2 sp038882935	70.02	0	1251477	44.0368	China: Tengchong county, Yunnan, GXS pool	Hot spring sediment	3	3	0	0	3	2	10	0	0	0	0	0	1	0	0	0	0	2	1	1	1	2	2	0	1	1	2	1	2	0	1	1	1	1	0	0	0	0	0	0	1
DRTY-6_201709_bins_87	GCA_038873435.1	d__Archaea;p__Halobacteriota;c__Archaeoglobi;o__Archaeoglobales;f__Archaeoglobaceae;g__WYZ-LMO2;s__WYZ-LMO2 sp038882935	79.96	1.31	1123794	44.9653	China: Tengchong county, Yunnan, DRTY-6 pool	Hot spring sediment	6	1	2	0	3	2	10	0	0	0	0	0	0	0	0	0	0	2	2	1	1	2	1	0	1	1	1	1	2	0	1	3	1	0	0	0	0	0	0	0	0
DRTY-6_201808_bins_27	GCA_038872235.1	d__Archaea;p__Halobacteriota;c__Archaeoglobi;o__Archaeoglobales;f__Archaeoglobaceae;g__WYZ-LMO2;s__WYZ-LMO2 sp038882935	55.58	0	1212977	43.4072	China: Tengchong county, Yunnan, DRTY-6 pool	Hot spring sediment	3	4	0	0	2	1	7	0	0	0	0	0	0	0	0	0	0	3	1	1	1	1	3	1	0	0	1	1	2	0	1	0	1	0	0	0	0	0	0	0	0
DRTY-7_201803_bins_15	GCA_038881095.1	d__Archaea;p__Halobacteriota;c__Archaeoglobi;o__Archaeoglobales;f__Archaeoglobaceae;g__WYZ-LMO2;s__WYZ-LMO2 sp038882935	66.91	1.63	1115374	43.532	China: Tengchong county, Yunnan, DRTY-7 pool	Hot spring sediment	4	2	1	0	3	3	12	0	0	0	0	0	0	0	0	0	0	1	1	1	0	1	1	0	1	1	0	0	1	0	1	2	0	1	0	0	0	0	0	0	0
DRTY-6_201907_bins_89	GCA_038883395.1	d__Archaea;p__Halobacteriota;c__Archaeoglobi;o__Archaeoglobales;f__Archaeoglobaceae;g__WYZ-LMO2;s__WYZ-LMO2 sp038882935	63.31	0	831071	45.1705	China: Tengchong county, Yunnan, DRTY-6 pool	Hot spring sediment	1	0	0	1	2	3	7	0	0	0	0	0	1	0	0	0	0	2	0	1	1	2	1	1	0	1	1	1	2	1	0	1	1	0	0	0	0	0	0	0	0
DRTY-8_201705_bins_15	GCA_038880075.1	d__Archaea;p__Halobacteriota;c__Archaeoglobi;o__Archaeoglobales;f__Archaeoglobaceae;g__WYZ-LMO2;s__WYZ-LMO2 sp038882935	74.67	0.7	1139914	44.6923	China: Tengchong county, Yunnan, DRTY-8 pool	Hot spring sediment	2	1	3	0	1	2	7	0	0	0	0	0	1	0	0	0	0	1	1	1	1	2	3	1	0	1	2	1	2	1	1	2	0	1	0	0	0	0	0	0	1
S1_Bin_MAXBIN__075_sub_1	GCA_938048785.1	d__Archaea;p__Halobacteriota;c__Archaeoglobi;o__Archaeoglobales;f__Archaeoglobaceae;g__WYZ-LMO2;s__WYZ-LMO2 sp938048785	92.48	2.97	1650651	44.7278	China	seawater	9	1	2	0	3	1	5	0	0	0	0	0	0	0	0	0	0	1	1	0	1	2	2	0	2	0	2	1	2	1	1	1	1	1	0	0	0	0	0	0	0
JZ-1_201901_bins_78	GCA_038865775.1	d__Archaea;p__Halobacteriota;c__Archaeoglobi;o__Archaeoglobales;f__Archaeoglobaceae;g__WYZ-LMO2;s__WYZ-LMO2 sp038882935	95.58	1.31	1285467	44.7859	China: Tengchong county, Yunnan, JZ-1 pool	Hot spring sediment	5	1	1	0	3	2	6	0	0	0	0	0	1	0	0	0	0	2	1	1	1	2	3	1	1	1	2	1	2	1	1	2	1	1	0	0	0	0	0	0	1
JZ-2_202101_bins_144	GCA_038868655.1	d__Archaea;p__Halobacteriota;c__Archaeoglobi;o__Archaeoglobales;f__Archaeoglobaceae;g__WYZ-LMO2;s__WYZ-LMO2 sp038882935	71.24	0.65	1156777	45.339	China: Tengchong county, Yunnan, JZ-2 pool	Hot spring sediment	3	1	1	0	2	1	7	0	0	0	0	0	1	0	0	0	0	1	0	0	1	2	4	0	1	1	2	1	2	0	1	2	1	1	0	0	0	0	0	0	1
JZ-1_201912_bins_26	GCA_038861985.1	d__Archaea;p__Halobacteriota;c__Archaeoglobi;o__Archaeoglobales;f__Archaeoglobaceae;g__WYZ-LMO2;s__WYZ-LMO2 sp038882935	95.1	1.31	1337700	44.8059	China: Tengchong county, Yunnan, JZ-1 pool	Hot spring sediment	5	3	2	0	3	2	12	0	0	0	0	0	1	0	0	0	0	2	1	1	1	2	2	1	1	1	1	1	2	1	1	3	1	1	0	0	0	0	0	0	1
JZ-1_201709_bins_66	GCA_038841255.1	d__Archaea;p__Halobacteriota;c__Archaeoglobi;o__Archaeoglobales;f__Archaeoglobaceae;g__WYZ-LMO2;s__WYZ-LMO2 sp038882935	92.96	1.31	1278519	44.7771	China: Tengchong county, Yunnan, JZ-1 pool	Hot spring sediment	2	1	1	0	3	1	7	0	0	0	0	0	1	0	0	0	0	2	1	1	1	2	3	1	1	1	2	1	2	1	1	2	1	1	0	0	0	0	0	0	1
JZ-1_201705_bins_73	GCA_038844195.1	d__Archaea;p__Halobacteriota;c__Archaeoglobi;o__Archaeoglobales;f__Archaeoglobaceae;g__WYZ-LMO2;s__WYZ-LMO2 sp038882935	98.04	1.31	1503105	44.5316	China: Tengchong county, Yunnan, JZ-1 pool	Hot spring sediment	6	3	2	0	3	3	11	0	0	0	0	0	1	0	0	0	0	2	1	1	1	2	3	1	1	1	2	1	2	1	1	2	1	1	0	0	0	0	0	0	1
JZ-1_201803_bins_44	GCA_038839625.1	d__Archaea;p__Halobacteriota;c__Archaeoglobi;o__Archaeoglobales;f__Archaeoglobaceae;g__WYZ-LMO2;s__WYZ-LMO2 sp038882935	88.89	1.31	1167103	44.8393	China: Tengchong county, Yunnan, JZ-1 pool	Hot spring sediment	2	1	1	0	2	0	6	0	0	0	0	0	1	0	0	0	0	2	1	0	0	2	3	1	1	1	1	1	2	1	1	2	1	2	0	0	0	0	0	0	1
JZ-1_201907_bins_76	GCA_038863745.1	d__Archaea;p__Halobacteriota;c__Archaeoglobi;o__Archaeoglobales;f__Archaeoglobaceae;g__WYZ-LMO2;s__WYZ-LMO2 sp038882935	87.26	0.65	1159227	44.7235	China: Tengchong county, Yunnan, JZ-1 pool	Hot spring sediment	4	3	2	0	2	1	10	0	0	0	0	0	0	0	0	0	0	3	1	1	2	2	4	1	1	1	1	0	0	0	0	2	0	1	0	0	0	0	0	0	1
JZ-1_202101_bins_38	GCA_038855325.1	d__Archaea;p__Halobacteriota;c__Archaeoglobi;o__Archaeoglobales;f__Archaeoglobaceae;g__WYZ-LMO2;s__WYZ-LMO2 sp038882935	75	0.65	1011667	44.9412	China: Tengchong county, Yunnan, JZ-1 pool	Hot spring sediment	3	2	1	0	1	4	10	0	0	0	0	0	1	0	0	0	0	1	1	0	0	1	3	0	1	1	1	1	1	0	1	2	0	1	0	0	0	0	0	0	1
GXS_201907_bins_24	GCA_038831615.1	d__Archaea;p__Halobacteriota;c__Archaeoglobi;o__Archaeoglobales;f__Archaeoglobaceae;g__WYZ-LMO2;s__WYZ-LMO2 sp038882935	95.42	1.31	1399308	44.741	China: Tengchong county, Yunnan, GXS pool	Hot spring sediment	5	3	2	0	4	3	13	0	0	0	0	0	1	0	0	0	0	3	2	1	1	2	3	1	1	1	2	1	1	1	1	2	0	1	0	0	0	0	0	0	1
SRBZ-1_202007_bins_91	GCA_038886655.1	d__Archaea;p__Halobacteriota;c__Archaeoglobi;o__Archaeoglobales;f__Archaeoglobaceae;g__WYZ-LMO2;s__WYZ-LMO2 sp038882935	94.77	1.31	1541783	44.3997	China: Tengchong county, Yunnan, SRBZ-1 pool	Hot spring sediment	6	2	1	0	3	3	13	0	0	0	0	0	1	0	0	0	0	2	1	1	1	2	3	0	1	1	2	1	1	1	1	2	0	1	0	0	0	0	0	0	2
SRBZ-1_201808_bins_25	GCA_038888755.1	d__Archaea;p__Halobacteriota;c__Archaeoglobi;o__Archaeoglobales;f__Archaeoglobaceae;g__WYZ-LMO2;s__WYZ-LMO2 sp038882935	93.3	0.65	1321589	44.9513	China: Tengchong county, Yunnan, SRBZ-1 pool	Hot spring sediment	4	3	1	0	3	3	12	0	0	0	0	0	1	0	0	0	0	1	1	1	1	2	3	1	1	1	2	1	2	1	1	2	1	1	0	0	0	0	0	0	1
QQ_201705_bins_21	GCA_038896795.1	d__Archaea;p__Halobacteriota;c__Archaeoglobi;o__Archaeoglobales;f__Archaeoglobaceae;g__WYZ-LMO2;s__WYZ-LMO2 sp038882935	95.59	1.31	1533779	44.3978	China: Tengchong county, Yunnan, QQ pool	Hot spring sediment	7	3	2	0	3	3	13	0	0	0	0	0	1	0	0	0	0	2	2	1	1	2	3	1	1	1	1	1	2	1	1	2	1	1	0	0	0	0	0	0	1
DRTY-6_201912_bins_46	GCA_038882935.1	d__Archaea;p__Halobacteriota;c__Archaeoglobi;o__Archaeoglobales;f__Archaeoglobaceae;g__WYZ-LMO2;s__WYZ-LMO2 sp038882935	95.42	1.31	1512977	44.5746	China: Tengchong county, Yunnan, DRTY-6 pool	Hot spring sediment	9	2	2	0	3	2	12	0	0	0	0	0	1	0	0	0	0	3	2	1	1	2	3	1	1	1	2	1	1	1	1	2	0	1	0	0	0	0	0	0	1
QQ_201709_bins_118	GCA_038896635.1	d__Archaea;p__Halobacteriota;c__Archaeoglobi;o__Archaeoglobales;f__Archaeoglobaceae;g__WYZ-LMO2;s__WYZ-LMO2 sp038882935	79.68	1.96	1219086	44.5056	China: Tengchong county, Yunnan, QQ pool	Hot spring sediment	4	4	1	0	3	1	10	0	0	0	0	0	1	0	0	0	0	1	1	1	1	1	2	1	1	1	0	0	1	0	1	1	1	1	0	0	0	0	0	0	1
JZ-2_201601_bins_20	GCA_038853955.1	d__Archaea;p__Halobacteriota;c__Archaeoglobi;o__Archaeoglobales;f__Archaeoglobaceae;g__WYZ-LMO2;s__WYZ-LMO2 sp038882935	95.42	1.31	1436928	44.6833	China: Tengchong county, Yunnan, JZ-2 pool	Hot spring sediment	8	3	1	0	3	2	11	0	0	0	0	0	1	0	0	0	0	2	2	1	1	2	3	1	1	1	2	1	2	1	1	2	1	1	0	0	0	0	0	0	1
ZZQ_201803_bins_88	GCA_038817235.1	d__Archaea;p__Halobacteriota;c__Archaeoglobi;o__Archaeoglobales;f__Archaeoglobaceae;g__WYZ-LMO2;s__WYZ-LMO2 sp038882935	80.72	0	1038357	44.9277	China: Tengchong county, Yunnan, ZZQ pool	Hot spring sediment	1	0	1	0	2	1	4	0	0	0	0	0	1	0	0	0	0	2	1	0	1	2	2	0	1	1	1	1	2	0	1	2	1	1	0	0	0	0	0	0	1
JZ-1_202007_bins_43	GCA_038858165.1	d__Archaea;p__Halobacteriota;c__Archaeoglobi;o__Archaeoglobales;f__Archaeoglobaceae;g__WYZ-LMO2;s__WYZ-LMO2 sp038882935	94.12	1.31	1305500	44.8283	China: Tengchong county, Yunnan, JZ-1 pool	Hot spring sediment	5	0	2	0	3	1	5	0	0	0	0	0	1	0	0	0	0	2	1	1	1	2	3	1	1	1	2	1	2	1	1	3	1	1	0	0	0	0	0	0	1
GXS_201912_bins_66	GCA_038830315.1	d__Archaea;p__Halobacteriota;c__Archaeoglobi;o__Archaeoglobales;f__Archaeoglobaceae;g__WYZ-LMO2;s__WYZ-LMO2 sp038882935	78.1	0.65	1050611	44.9232	China: Tengchong county, Yunnan, GXS pool	Hot spring sediment	3	2	0	0	3	3	12	0	0	0	0	0	1	0	0	0	0	2	1	0	1	1	2	1	0	1	1	1	1	0	1	1	0	1	0	0	0	0	0	0	1
SZTDM-1c_201709_bins_14	GCA_038997945.1	d__Archaea;p__Halobacteriota;c__Archaeoglobi;o__Archaeoglobales;f__Archaeoglobaceae;g__WYZ-LMO2;s__WYZ-LMO2 sp038882935	76.3	1.63	1102002	44.6013	China: Tengchong county, Yunnan, SZTDM-1c pool	Hot spring sediment	1	2	1	0	3	2	11	0	0	0	0	0	0	0	0	0	0	0	1	1	1	2	3	0	1	1	1	0	0	0	0	2	0	0	0	0	0	0	0	0	1
DRTY-1_201901_bins_16	GCA_038732925.1	d__Archaea;p__Halobacteriota;c__Archaeoglobi;o__Archaeoglobales;f__Archaeoglobaceae;g__WYZ-LMO2;s__WYZ-LMO2 sp038882935	74.58	1.31	1144254	44.3355	China: Tengchong county, Yunnan, DRTY-1 pool	Hot spring sediment	3	1	2	0	2	2	8	0	0	0	0	0	0	0	0	0	0	3	2	0	0	1	3	1	0	1	0	1	2	1	1	2	1	1	0	0	0	0	0	0	0
GXS_202007_bins_51	GCA_038828815.1	d__Archaea;p__Halobacteriota;c__Archaeoglobi;o__Archaeoglobales;f__Archaeoglobaceae;g__WYZ-LMO2;s__WYZ-LMO2 sp038882935	93.46	1.31	1359444	44.7248	China: Tengchong county, Yunnan, GXS pool	Hot spring sediment	6	3	2	0	3	2	12	0	0	0	0	0	1	0	0	0	0	3	2	1	1	2	3	1	1	1	2	1	2	1	1	2	1	1	0	0	0	0	0	0	1
SZTDM-1c_201709_bins_87	GCA_038894415.1	d__Archaea;p__Halobacteriota;c__Archaeoglobi;o__Archaeoglobales;f__Archaeoglobaceae;g__WYZ-LMO2;s__WYZ-LMO2 sp038731605	85.42	1.96	1355937	47.1031	China: Tengchong county, Yunnan, SZTDM-1c pool	Hot spring sediment	2	2	1	0	4	2	8	0	0	0	0	0	1	0	0	0	0	2	2	1	1	2	3	1	1	0	2	1	1	1	0	2	0	2	0	0	0	0	0	0	1
SRBZ-1_201808_bins_19	GCA_038888995.1	d__Archaea;p__Halobacteriota;c__Archaeoglobi;o__Archaeoglobales;f__Archaeoglobaceae;g__WYZ-LMO2;s__WYZ-LMO2 sp038731605	97.39	1.31	1641252	46.925	China: Tengchong county, Yunnan, SRBZ-1 pool	Hot spring sediment	5	2	1	0	4	3	9	0	0	0	0	0	1	0	0	0	0	2	2	1	1	2	3	1	1	1	2	1	2	1	1	2	1	2	0	0	0	0	0	0	1
DRTY-1_201808_bins_13	GCA_038734365.1	d__Archaea;p__Halobacteriota;c__Archaeoglobi;o__Archaeoglobales;f__Archaeoglobaceae;g__WYZ-LMO2;s__WYZ-LMO2 sp038731605	94.72	1.41	1655205	46.8051	China: Tengchong county, Yunnan, DRTY-1 pool	Hot spring sediment	5	2	1	0	5	2	8	0	0	0	0	0	1	0	0	0	0	2	2	0	0	1	3	1	1	1	2	1	2	1	1	2	1	2	0	0	0	0	0	0	2
DRTY-1_201901_bins_47	GCA_038731605.1	d__Archaea;p__Halobacteriota;c__Archaeoglobi;o__Archaeoglobales;f__Archaeoglobaceae;g__WYZ-LMO2;s__WYZ-LMO2 sp038731605	99.35	1.31	1671425	46.9387	China: Tengchong county, Yunnan, DRTY-1 pool	Hot spring sediment	6	2	1	0	4	3	9	0	0	0	0	0	1	0	0	0	0	2	2	1	1	2	3	1	1	1	2	1	2	1	1	2	1	2	0	0	0	0	0	0	1
[truncated: 39 more columns]
