# Supplementary material for: Direct utilization of long-chain fatty acid for methane production by thermophilic Archaeoglobi
Source: Research Square preprint supplement (doi:10.21203/rs.3.rs-7873196/v1), 2025-10-24
Supplement: Supplementary file 5 [file f7f2857f14bcb79c63c3aa58.xlsx]

## Sheet: Fig. 1b_before_incubation
Supplementary Table 2 The properties of MAGs, including completeness, contamination, relative abundance in metagenome and metatranscriptome, and the presence of mcr genes along with the expression levels of these genes.
Bin Id	Classification	Completeness (%)	Contamination (%)	Relative Abundance in metagenome (%)
1_001	d__Bacteria;p__Acidobacteriota;c__Aminicenantia;o__Aminicenantales;f__Saccharicenantaceae;g__Saccharicenans;s__	90.14	6.03	9.74497
1_002	d__Bacteria;p__Acidobacteriota;c__Aminicenantia;o__Aminicenantales;f__CALLJL01;g__CALLJL01;s__	89.52	9.69	4.92853
1_003	Unclassified Bacteria	12.07	3.45	2.85463
1_004	d__Bacteria;p__Chloroflexota;c__Anaerolineae;o__Anaerolineales;f__Anaerolineaceae;g__Bellilinea;s__	77.27	5.64	1.43776
1_005	d__Bacteria;p__Desulfobacterota;c__BSN033;o__BSN033;f__UBA1163;g__CALIBK01;s__	92.77	3.44	1.20619
1_006	d__Archaea;p__Thermoproteota;c__Bathyarchaeia;o__Bathyarchaeales;f__UBA233;g__JAGTQX01;s__JAGTQX01 sp018396675	99.07	18.22	1.1908
1_007	d__Bacteria;p__Chloroflexota;c__Anaerolineae;o__B4-G1;f__DUEL01;g__SZUA-1492;s__	89.09	1.82	0.996307
1_008	d__Archaea;p__Halobacteriota;c__Methanosarcinia;o__Methanotrichales;f__Methanotrichaceae;g__Methanothrix_B;s__Methanothrix_B sp030055635	99.84	0.16	0.956521
1_009	d__Bacteria;p__Actinomycetota;c__Coriobacteriia;o__Anaerosomatales;f__Anaerosomataceae;g__;s__	95.69	3.33	0.957801
1_010	d__Bacteria;p__Bacteroidota;c__Ignavibacteria;o__Ignavibacteriales;f__Ignavibacteriaceae;g__Ignavibacterium;s__	17.24	0	0.987004
1_011	d__Bacteria;p__Chloroflexota;c__Anaerolineae;o__Anaerolineales;f__Anaerolineaceae;g__Bellilinea;s__	84.09	18.92	0.952037
1_012	d__Archaea;p__Thermoproteota;c__Bathyarchaeia;o__Bathyarchaeales;f__UBA233;g__JAOAIV01;s__JAOAIV01 sp026014545	84.97	6.07	0.873636
1_013	d__Bacteria;p__Nitrospirota;c__Thermodesulfovibrionia;o__Thermodesulfovibrionales;f__Thermodesulfovibrionaceae;g__Thermodesulfovibrio;s__	96.33	2.45	0.867316
1_014	Unclassified Bacteria	0	0	0.759924
1_015	Unclassified Bacteria	16.46	4.23	0.797636
1_016	d__Bacteria;p__Bacteroidota;c__Ignavibacteria;o__Ignavibacteriales;f__Ignavibacteriaceae;g__Ignavibacterium;s__	55.34	15.52	0.783152
1_017	d__Bacteria;p__Bacteroidota;c__Ignavibacteria;o__Ignavibacteriales;f__Ignavibacteriaceae;g__Ignavibacterium;s__	8.66	0	0.765481
1_018	d__Bacteria;p__Verrucomicrobiota;c__Verrucomicrobiae;o__Limisphaerales;f__DTLC01;g__DTLC01;s__	94.43	11.85	0.728131
1_019	d__Bacteria;p__Desulfobacterota;c__Desulfuromonadia;o__Desulfuromonadales;f__JACZKF01;g__;s__	33.71	0.12	0.742052
1_020	d__Bacteria;p__Desulfobacterota;c__Desulfuromonadia;o__Desulfuromonadales;f__BM103;g__;s__	14.37	1.02	0.651257
1_021	d__Bacteria;p__Desulfobacterota;c__Desulfuromonadia;o__Desulfuromonadales;f__DDH964;g__;s__	35.09	0	0.682475
1_022	d__Archaea;p__Thermoproteota;c__Bathyarchaeia;o__Bathyarchaeales;f__UBA233;g__JAOAIV01;s__	40.59	0	0.558774
1_023	d__Bacteria;p__Chloroflexota;c__Anaerolineae;o__SpSt-313;f__SpSt-313;g__JAKPJZ01;s__	98.62	8.62	0.627708
1_024	d__Bacteria;p__Armatimonadota;c__UBA5829;o__DTJY01;f__DTJY01;g__;s__	94.44	6.69	0.561681
1_025	d__Bacteria;p__Chloroflexota;c__Anaerolineae;o__Anaerolineales;f__Anaerolineaceae;g__Bellilinea;s__	89.09	9.37	0.56717
1_026	d__Bacteria;p__Chloroflexota;c__Anaerolineae;o__Aggregatilineales;f__Aggregatilineaceae;g__UBA2029;s__	89.7	15.81	0.590382
1_027	d__Bacteria;p__Desulfobacterota;c__SM23-61;o__SM23-61;f__SM23-61;g__;s__	95.48	13.12	0.563806
1_028	d__Bacteria;p__Nitrospirota;c__Thermodesulfovibrionia;o__Thermodesulfovibrionales;f__JdFR-86;g__;s__	98.18	0.23	0.497171
1_029	d__Bacteria;p__Acidobacteriota;c__Terriglobia;o__Bryobacterales;f__Bryobacteraceae;g__DTHT01;s__	90.17	7.01	0.562773
1_030	d__Bacteria;p__Bacteroidota;c__Ignavibacteria;o__Ignavibacteriales;f__Ignavibacteriaceae;g__Ignavibacterium;s__Ignavibacterium album_D	68.89	12.77	0.486947
1_031	d__Archaea;p__Thermoproteota;c__Methanomethylicia;o__Methanomethylicales;f__Methanomethylicaceae;g__WYZ-LMO10;s__WYZ-LMO10 sp029887795	95.33	4.67	0.459465
1_032	d__Bacteria;p__JANLFM01;c__JANLFM01;o__JANLFM01;f__JANLFM01;g__JANLFM01;s__	97.41	2.07	0.442411
1_033	d__Bacteria;p__Armatimonadota;c__UBA5829;o__DTJY01;f__DTJY01;g__;s__	90.74	2.31	0.42296
1_034	d__Archaea;p__Thermoproteota;c__Methanomethylicia;o__Methanomethylicales;f__Methanomethylicaceae;g__Methanosuratincola;s__Methanosuratincola sp030055545	94.39	2.16	0.427133
1_035	d__Bacteria;p__Acidobacteriota;c__Aminicenantia;o__Aminicenantales;f__Saccharicenantaceae;g__Saccharicenans;s__	92.08	9.46	0.411763
1_036	d__Bacteria;p__Desulfobacterota;c__Desulfobaccia;o__Desulfobaccales;f__0-14-0-80-60-11;g__JAILZL01;s__	94.84	9.18	0.396297
1_037	d__Archaea;p__Thermoproteota;c__Bathyarchaeia;o__Bathyarchaeales;f__UBA233;g__JAOAIV01;s__	98.13	73.58	0.383375
1_038	d__Bacteria;p__Nitrospirota;c__Thermodesulfovibrionia;o__Thermodesulfovibrionales;f__CALJEL01;g__CALJEL01;s__	100	1.41	0.368309
1_039	d__Bacteria;p__Spirochaetota;c__UBA4802;o__UBA4802;f__UB4802;g__UBA4802;s__	89	16.29	0.373471
1_040	d__Bacteria;p__Acidobacteriota;c__Terriglobia;o__Bryobacterales;f__Bryobacteraceae;g__JAIMAR01;s__	15.52	0	0.462379
1_041	d__Archaea;p__Halobacteriota;c__Methanomicrobia;o__Methanomicrobiales;f__JACTUA01;g__JARYLJ01;s__	72.43	38.79	0.340942
1_042	d__Bacteria;p__Planctomycetota;c__Phycisphaerae;o__Sedimentisphaerales;f__SG8-4;g__;s__	98.86	11.36	0.348079
1_043	d__Bacteria;p__WOR-3;c__WOR-3;o__UBA2258;f__UBA2258;g__JAOABP01;s__	96.63	21.45	0.336092
1_044	d__Archaea;p__Halobacteriota;c__Methanomicrobia;o__Methanomicrobiales;f__JACTUA01;g__JARYLJ01;s__	53.43	27.37	0.328006
1_045	d__Bacteria;p__Desulfobacterota;c__Desulfuromonadia;o__Desulfuromonadales;f__BM103;g__VAUL01;s__	54.67	27.54	0.403085
1_046	d__Bacteria;p__Desulfobacterota;c__Desulfuromonadia;o__Desulfuromonadales;f__BM103;g__;s__	42.98	14.04	0.404949
1_047	d__Bacteria;p__Chloroflexota;c__Anaerolineae;o__CG2-30-64-16;f__CG2-30-64-16;g__;s__	89.27	5.45	0.344304
1_048	d__Bacteria;p__Desulfobacterota;c__Desulfuromonadia;o__Desulfuromonadales;f__UBA2197;g__;s__	77.19	32.46	0.341799
1_049	d__Bacteria;p__Verrucomicrobiota;c__Verrucomicrobiae;o__Limisphaerales;f__J093;g__JAAYVR01;s__	96.62	3.43	0.301538
1_050	d__Bacteria;p__Pseudomonadota;c__Gammaproteobacteria;o__Burkholderiales;f__Burkholderiaceae;g__CAMLOF01;s__	94.77	4.82	0.311167
1_051	d__Bacteria;p__Bacteroidota;c__Ignavibacteria;o__Ignavibacteriales;f__Melioribacteraceae;g__JARYLX01;s__	98.88	46.09	0.30223
1_052	d__Bacteria;p__Chloroflexota;c__Anaerolineae;o__B4-G1;f__DUEL01;g__SpSt-77;s__	84.09	8.35	0.295957
1_053	d__Bacteria;p__KSB1;c__UBA2214;o__UBA2214;f__Zgenome-0027;g__RPQV01;s__	90.11	1.61	0.269476
1_054	d__Bacteria;p__DUMJ01;c__DUMJ01;o__DUMJ01;f__DUMJ01;g__DUMJ01;s__	100	19.83	0.27539
1_055	d__Archaea;p__Thermoproteota;c__EX4484-205;o__EX4484-205;f__JAAOZP01;g__JAAOZP01;s__	85.05	9.19	0.270256
1_056	d__Bacteria;p__Armatimonadota;c__CAIYQO01;o__WVXJ01;f__DTIZ01;g__;s__	93.52	6.94	0.277744
1_057	d__Bacteria;p__Pseudomonadota;c__Gammaproteobacteria;o__Burkholderiales;f__Burkholderiaceae;g__DSNY01;s__	32.23	5.16	0.288642
1_058	d__Bacteria;p__Thermotogota;c__Thermotogae;o__Thermotogales;f__DSM-5069;g__Pseudothermotoga_B;s__	97.26	0	0.253217
1_059	d__Bacteria;p__Pseudomonadota;c__Gammaproteobacteria;o__Burkholderiales;f__Burkholderiaceae;g__DSNY01;s__	69.76	29.31	0.282187
1_060	Unclassified Bacteria	7.57	4.12	0.351644
1_061	d__Bacteria;p__Pseudomonadota;c__Alphaproteobacteria;o__Geminicoccales;f__Geminicoccaceae;g__JANXAZ01;s__	40.99	16.47	0.263414
1_062	d__Archaea;p__Thermoproteota;c__Bathyarchaeia;o__TCS64;f__TCS64;g__JAGTQU01;s__	92.06	17.51	0.232748
1_063	d__Archaea;p__Thermoproteota;c__Bathyarchaeia;o__TCS64;f__TCS64;g__JAGTRB01;s__JAGTRB01 sp018396865	90.34	5.94	0.224637
1_064	d__Bacteria;p__Pseudomonadota;c__Alphaproteobacteria;o__Geminicoccales;f__Geminicoccaceae;g__JANXAZ01;s__	57.64	15.52	0.248496
1_065	d__Bacteria;p__Actinomycetota;c__Aquicultoria;o__SKW223;f__SKW223;g__;s__	89.18	7.77	0.233921
1_066	d__Bacteria;p__Deinococcota;c__Deinococci;o__Deinococcales;f__Thermaceae;g__Meiothermus;s__	91.92	1.5	0.222896
1_067	d__Archaea;p__Thermoplasmatota;c__Thermoplasmata;o__Methanomassiliicoccales;f__JACIVX01;g__JACIVX01;s__	98.34	7.6	0.223254
1_068	d__Bacteria;p__Armatimonadota;c__Fimbriimonadia;o__Fimbriimonadales;f__GBS-DC;g__GBS-DC;s__	88.58	7.61	0.229416
1_069	d__Bacteria;p__Bacillota_A;c__Clostridia;o__Lutisporales;f__Lutisporaceae;g__;s__	94.03	8.92	0.221292
1_070	d__Bacteria;p__Pseudomonadota;c__Gammaproteobacteria;o__Burkholderiales;f__Burkholderiaceae;g__DSNY01;s__	4.17	0	0.233631
1_071	d__Bacteria;p__Chloroflexota;c__Anaerolineae;o__4572-78;f__NAK82;g__NAK82;s__	71.41	16.64	0.24542
1_072	d__Bacteria;p__Chloroflexota;c__Anaerolineae;o__JAAYZQ01;f__JAAYZQ01;g__TumbabinsA96;s__	53.64	3.28	0.230032
1_073	d__Bacteria;p__Chloroflexota;c__Anaerolineae;o__Anaerolineales;f__UBA4823;g__;s__	69.69	25.45	0.234917
1_074	d__Bacteria;p__Acidobacteriota;c__Thermoanaerobaculia;o__Thermoanaerobaculales;f__Thermoanaerobaculaceae;g__Thermoanaerobaculum;s__	92.45	6.79	0.222338
1_075	d__Bacteria;p__Chloroflexota;c__Anaerolineae;o__Anaerolineales;f__UBA4823;g__JAKOUW01;s__	60.64	19.91	0.228783
1_076	d__Bacteria;p__Chloroflexota;c__Anaerolineae;o__DTLA01;f__DTLA01;g__DTLA01;s__	85.78	7.44	0.234425
1_077	d__Bacteria;p__Chloroflexota;c__Anaerolineae;o__UBA1429;f__UBA1429;g__JAIOAW01;s__	92.66	8.59	0.214917
1_078	d__Archaea;p__Thermoproteota;c__Bathyarchaeia;o__Bathyarchaeales;f__UBA233;g__WUQU01;s__	46.34	27.1	0.273994
1_079	d__Bacteria;p__Chloroflexota;c__Anaerolineae;o__Anaerolineales;f__UBA4823;g__;s__	22.08	7.69	0.226134
1_080	d__Bacteria;p__Armatimonadota;c__HRBIN16;o__HRBIN16;f__HRBIN16;g__HRBIN16;s__	87.42	7.23	0.215939
1_081	d__Bacteria;p__Pseudomonadota;c__Gammaproteobacteria;o__Burkholderiales;f__Burkholderiaceae;g__DSNY01;s__	18.79	4.06	0.225073
1_082	d__Bacteria;p__WOR-3;c__WOR-3;o__;f__;g__;s__	6.94	0.83	0.215213
1_083	d__Bacteria;p__Atribacterota;c__Atribacteria;o__Atribacterales;f__Caldatribacteriaceae;g__JABUEZ01;s__	98.28	33.64	0.204873
1_084	d__Bacteria;p__Chloroflexota;c__Chloroflexia;o__DTKN01;f__DTKN01;g__;s__	86.23	7.98	0.209701
1_085	d__Archaea;p__Thermoproteota;c__Nitrososphaeria_A;o__Caldarchaeales;f__;g__;s__	95.44	26.38	0.208134
1_086	d__Bacteria;p__Chloroflexota;c__Anaerolineae;o__JAAYZQ01;f__JAAYZQ01;g__TumbabinsA96;s__	36.21	2.59	0.214226
1_087	d__Bacteria;p__WOR-3;c__WOR-3;o__SM23-42;f__JAOAFX01;g__JAOAFX01;s__	89.24	17.33	0.202547
1_088	d__Bacteria;p__Actinomycetota;c__Coriobacteriia;o__Anaerosomatales;f__Anaerosomataceae;g__Parvivirga;s__	91.38	30.52	0.217495
1_089	d__Bacteria;p__Chloroflexota;c__Anaerolineae;o__Anaerolineales;f__UBA4823;g__JAJUJL01;s__	60.24	24.14	0.203237
1_090	d__Bacteria;p__Desulfobacterota;c__BSN033;o__BSN033;f__;g__;s__	53.89	10.83	0.198525
1_091	d__Bacteria;p__Actinomycetota;c__Geothermincolia;o__Geothermincolales;f__RBG-13-55-18;g__;s__	93.59	24.65	0.204662
1_092	d__Bacteria;p__Bipolaricaulota;c__Bipolaricaulia;o__Bipolaricaulales;f__Bipolaricaulaceae;g__DTER01;s__	35.4	3.76	0.207476
1_093	d__Bacteria;p__Pseudomonadota;c__Gammaproteobacteria;o__Methylococcales;f__Methylothermaceae;g__Methylohalobius;s__	75.03	8.47	0.18932
1_094	d__Bacteria;p__Armatimonadota;c__UBA5829;o__DSUL01;f__DSUL01;g__CALCJH01;s__	75.96	10.16	0.190141
1_095	d__Bacteria;p__Planctomycetota;c__Brocadiia;o__CAIUPP01;f__CAIUPP01;g__;s__	74.23	15.73	0.181961
1_096	Unclassified Bacteria	3.76	0	0.20296
1_097	d__Bacteria;p__Chloroflexota;c__Anaerolineae;o__SpSt-313;f__SpSt-313;g__SpSt-313;s__	73.9	13.05	0.197712
1_098	d__Bacteria;p__Acidobacteriota;c__Terriglobia;o__Bryobacterales;f__Bryobacteraceae;g__JAEHDI01;s__	63.79	40.94	0.184604
1_099	d__Bacteria;p__Planctomycetota;c__Phycisphaerae;o__UBA1845;f__PWPN01;g__JACQVT01;s__	82.86	3.79	0.18123
1_100	d__Bacteria;p__Chloroflexota;c__Anaerolineae;o__B4-G1;f__SLSP01;g__JAAZNO01;s__	66.77	27.03	0.189637
1_101	d__Bacteria;p__Spirochaetota;c__Spirochaetia;o__DTKZ01;f__DTKZ01;g__DTKZ01;s__	90.57	32.56	0.186896
1_102	d__Bacteria;p__CALINM01;c__CALINM01;o__CALINM01;f__CALINM01;g__;s__	50.89	24.05	0.186088
1_103	d__Bacteria;p__Chloroflexota;c__Anaerolineae;o__Anaerolineales;f__UBA4823;g__;s__	44.85	21.82	0.189112
1_104	d__Bacteria;p__Gemmatimonadota;c__Gemmatimonadetes;o__Longimicrobiales;f__RSA9;g__;s__	46.57	3.3	0.184243
1_105	d__Bacteria;p__Planctomycetota;c__Phycisphaerae;o__Tepidisphaerales;f__Tepidisphaeraceae;g__;s__	72.65	22.58	0.194131
1_106	d__Bacteria;p__Patescibacteria;c__Microgenomatia;o__PFEM01;f__;g__;s__	64.18	33.62	0.182375
1_107	d__Bacteria;p__Bipolaricaulota;c__Bipolaricaulia;o__RBG-16-55-9;f__DRXL01;g__JANXCC01;s__	84.57	6.7	0.187294
1_108	Unclassified Bacteria	9.23	0	0.193384
1_109	d__Bacteria;p__Desulfobacterota;c__Desulfuromonadia;o__Desulfuromonadales;f__BM103;g__;s__	27.19	5.26	0.206638
1_110	d__Bacteria;p__Verrucomicrobiota;c__Verrucomicrobiae;o__Limisphaerales;f__UBA8199;g__JARKQH01;s__	72.09	11.13	0.182784
1_111	d__Bacteria;p__Desulfobacterota;c__Desulfuromonadia;o__Desulfuromonadales;f__UBA2197;g__;s__	62.54	109.14	0.214735
1_112	d__Bacteria;p__Spirochaetota;c__Spirochaetia;o__Treponematales;f__Breznakiellaceae;g__DYPP01;s__	69.21	2.65	0.170221
1_113	d__Bacteria;p__Acidobacteriota;c__Aminicenantia;o__;f__;g__;s__	82.4	44.32	0.167648
1_114	d__Archaea;p__Thermoproteota;c__Bathyarchaeia;o__Bathyarchaeales;f__B26-1;g__;s__	83.82	33.46	0.17685
1_115	d__Bacteria;p__Pseudomonadota;c__Gammaproteobacteria;o__Pseudomonadales;f__Pseudomonadaceae;g__Pseudomonas_K;s__Pseudomonas_K sagittaria	29.98	3.51	0.192765
1_116	d__Bacteria;p__Bacteroidota;c__Bacteroidia;o__Bacteroidales;f__VadinHA17;g__LD21;s__	75.34	26.96	0.167275
1_117	d__Archaea;p__Thermoproteota;c__Bathyarchaeia;o__Bathyarchaeales;f__UBA233;g__WUQU01;s__	49.28	28.08	0.277816
1_118	d__Bacteria;p__Gemmatimonadota;c__Gemmatimonadetes;o__Longimicrobiales;f__RSA9;g__;s__	45	1.72	0.173536
1_119	d__Bacteria;p__Bacteroidota;c__Bacteroidia;o__Bacteroidales;f__UBA10428;g__UBA5072;s__	36.45	8.89	0.162061
1_120	d__Bacteria;p__Bacteroidota;c__Bacteroidia;o__Bacteroidales;f__VadinHA17;g__UBA8202;s__	15.99	1.72	0.160778
1_121	d__Bacteria;p__Actinomycetota;c__Coriobacteriia;o__Anaerosomatales;f__PHET01;g__JAJUJM01;s__	73.76	5.69	0.182032
1_122	d__Archaea;p__Thermoproteota;c__Nitrososphaeria;o__JACIWG01;f__JACIWG01;g__JACIWG01;s__	54.38	14.44	0.175471
1_123	Unclassified Bacteria	11.03	1.92	0.168056
1_124	d__Bacteria;p__Bacteroidota;c__Bacteroidia;o__Bacteroidales;f__UBA10428;g__UBA5072;s__	21.55	0	0.157528
1_125	d__Bacteria;p__Pseudomonadota;c__;o__;f__;g__;s__	45.69	13.59	0.173133
1_126	d__Bacteria;p__Chloroflexota;c__Anaerolineae;o__Anaerolineales;f__Anaerolineaceae;g__Thermanaerothrix;s__	47.02	7.68	0.167019
1_127	d__Bacteria;p__Nitrospirota;c__Thermodesulfovibrionia;o__Thermodesulfovibrionales;f__Dissulfurispiraceae;g__Dissulfurispira;s__	85.48	14.41	0.162765
1_128	d__Archaea;p__Thermoplasmatota;c__Thermoplasmata;o__UBA10834;f__UBA10834;g__JAJYIS01;s__	77.49	4.75	0.162605
1_129	d__Bacteria;p__Chloroflexota;c__JAJPGV01;o__;f__;g__;s__	55.2	34.33	0.185493
1_130	d__Bacteria;p__Spirochaetota;c__Spirochaetia;o__Treponematales;f__;g__;s__	17.27	7.27	0.169961
1_131	d__Archaea;p__Thermoproteota;c__Thermoprotei_A;o__Sulfolobales;f__NBVN01;g__Zestosphaera;s__	77.19	3.26	0.141863
1_132	d__Bacteria;p__Verrucomicrobiota;c__Verrucomicrobiae;o__Limisphaerales;f__;g__;s__	57.22	12.27	0.181947
1_133	d__Bacteria;p__Bacteroidota;c__Bacteroidia;o__Bacteroidales;f__VadinHA17;g__UBA8202;s__	72.73	24.14	0.155249
1_134	d__Bacteria;p__Armatimonadota;c__UBA5829;o__UBA5829;f__JAUSEB01;g__;s__	87.33	36.29	0.164528
1_135	d__Bacteria;p__Patescibacteria;c__WWE3;o__UBA101185;f__UBA10185;g__UBA8498;s__	46.96	10.87	0.164972
1_136	d__Bacteria;p__Actinomycetota;c__Aquicultoria;o__SKW223;f__CALKMS01;g__CALKMS01;s__	75.96	17.04	0.161634
1_137	Unclassified Bacteria	1.72	0	0.165738
1_138	Unclassified Bacteria	14.57	7.03	0.182923
1_139	d__Archaea;p__Thermoproteota;c__Bathyarchaeia;o__Bathyarchaeales;f__UBA233;g__;s__	78.62	63.13	0.210915
1_140	d__Bacteria;p__Pseudomonadota;c__Gammaproteobacteria;o__Methylococcales;f__Methylothermaceae;g__Methylohalobius;s__	14.69	1.38	0.157403
1_141	d__Bacteria;p__CALINM01;c__CALINM01;o__CALINM01;f__CALINM01;g__;s__	51.85	16.71	0.155795
1_142	d__Bacteria;p__KSB1;c__UBA2214;o__JACIZP01;f__JACIZP01;g__JACIZP01;s__	59.32	15.48	0.152881
1_143	d__Bacteria;p__Chloroflexota;c__DTOL01;o__DTOL01;f__;g__;s__	52.7	4.2	0.151609
1_144	d__Bacteria;p__Pseudomonadota;c__Alphaproteobacteria;o__Acetobacterales;f__Acetobacteraceae;g__Caldovatus;s__Caldovatus aquaticus	54.42	1.72	0.177639
1_145	d__Bacteria;p__Acidobacteriota;c__Terriglobia;o__Bryobacterales;f__Bryobacteraceae;g__VFZS01;s__	48.62	9.87	0.181744
1_146	d__Bacteria;p__Chloroflexota;c__Anaerolineae;o__Anaerolineales;f__Anaerolineaceae;g__Anaerolinea;s__	58.13	14.2	0.154167
1_147	d__Bacteria;p__Nitrospirota;c__Thermodesulfovibrionia;o__Thermodesulfovibrionales;f__UBA9159;g__;s__	63.03	6.59	0.157896
1_148	d__Bacteria;p__Acidobacteriota;c__UBA4820;o__UBA4820;f__UBA4820;g__UBA4820;s__	61.85	7.22	0.14858
1_149	d__Bacteria;p__Desulfobacterota;c__;o__;f__;g__;s__	24.48	4.31	0.171809
1_150	d__Bacteria;p__Chloroflexota;c__Anaerolineae;o__B4-G1;f__SLSP01;g__;s__	34.28	13.12	0.157019
1_151	d__Bacteria;p__KSB1;c__UBA2214;o__JACIZP01;f__JADDFT01;g__JAPWUV01;s__	74.04	29.02	0.149466
1_152	d__Bacteria;p__Desulfobacterota_B;c__Binatia;o__HRBIN30;f__HRBIN30;g__;s__	63.86	1.68	0.145903
1_153	d__Bacteria;p__AUK180;c__;o__;f__;g__;s__	38.64	6.66	0.153839
1_154	d__Bacteria;p__Armatimonadota;c__UBA5829;o__UBA5829;f__DTLH01;g__;s__	58.56	10.81	0.150544
1_155	d__Bacteria;p__QNDG01;c__QNDG01;o__QNDG01;f__DTFT01;g__;s__	55.1	4.08	0.159089
1_156	d__Bacteria;p__Chloroflexota;c__Anaerolineae;o__JAAYEA01;f__JAAYEA01;g__;s__	57.34	14.77	0.150539
1_157	d__Bacteria;p__Acidobacteriota;c__Thermoanaerobaculia;o__UBA2201;f__UBA2201;g__;s__	59.06	3.85	0.145145
1_158	d__Archaea;p__Thermoproteota;c__Bathyarchaeia;o__RBG-16-48-13;f__;g__;s__	66.45	13.04	0.135717
1_159	d__Bacteria;p__Planctomycetota;c__Phycisphaerae;o__SM23-33;f__;g__;s__	66.24	32.74	0.159043
1_160	d__Bacteria;p__Chloroflexota;c__Dehalococcoidia;o__Dehalococcoidales;f__UBA3254;g__;s__	51.68	32.32	0.143863
1_161	d__Bacteria;p__;c__;o__;f__;g__;s__	58.12	30.83	0.14829
1_162	d__Bacteria;p__Pseudomonadota;c__Alphaproteobacteria;o__Rhizobiales;f__Xanthobacteraceae;g__PNAI01;s__	51.48	8.29	0.15573
1_163	d__Bacteria;p__Planctomycetota;c__Brocadiia;o__CAIUPP01;f__CAIUPP01;g__;s__	55.91	16.05	0.141072
1_164	d__Bacteria;p__Patescibacteria;c__Paceibacteria;o__UBA6257;f__;g__;s__	75.6	46.27	0.144228
1_165	d__Bacteria;p__Chloroflexota;c__Anaerolineae;o__Anaerolineales;f__Villigracilaceae;g__;s__	40.3	4.45	0.140221
1_166	d__Bacteria;p__Bacillota;c__Bacilli;o__Aneurinibacillales;f__RAOX-1;g__;s__	39.47	3.51	0.137643
1_167	d__Bacteria;p__Pseudomonadota;c__;o__;f__;g__;s__	34.44	3.76	0.158055
1_168	d__Bacteria;p__Planctomycetota;c__Planctomycetia;o__Pirellulales;f__Thermoguttaceae;g__CALLPE01;s__	45.39	6.37	0.144173
1_169	d__Bacteria;p__Spirochaetota;c__Spirochaetia;o__Treponematales;f__Breznakiellaceae;g__DYPP01;s__	38.43	14.2	0.134927
1_170	d__Bacteria;p__Armatimonadota;c__UBA5829;o__UBA5829;f__UBA5829;g__;s__	63.24	26.48	0.130297
1_171	d__Bacteria;p__Chloroflexota;c__UBA6077;o__UBA6077;f__;g__;s__	39.27	5.61	0.140547
1_172	d__Bacteria;p__Desulfobacterota_G;c__Syntrophorhabdia;o__Syntrophorhabdales;f__Syntrophorhabdaceae;g__Syntrophorhabdus;s__	39.28	3.35	0.126436
1_173	d__Archaea;p__Halobacteriota;c__Methanocellia;o__Methanocellales;f__Methanocellaceae;g__Methanocella;s__	39.88	1.4	0.140012
1_174	d__Bacteria;p__Bacteroidota;c__Bacteroidia;o__Bacteroidales;f__Prolixibacteraceae;g__UBA1413;s__	38.01	6.65	0.121721
1_175	d__Bacteria;p__Nitrospirota_A;c__;o__;f__;g__;s__	35.05	22.14	0.127169
1_176	d__Bacteria;p__Desulfobacterota;c__WTBG01;o__CAIYCZ01;f__CAIRTM01;g__CAIRTM01;s__	35.77	0.65	0.13586
1_177	d__Bacteria;p__QNDG01;c__QNDG01;o__QNDG01;f__JABMRT01;g__DSAP01;s__	40.81	0.43	0.122103
Unmapped				29.3577

## Sheet: Fig. 1b_control-r1
Bin Id	Classification	Completeness (%)	Contamination (%)	Relative Abundance in metagenome (%)
2_001	d__Archaea;p__Thermoproteota;c__Bathyarchaeia;o__Bathyarchaeales;f__UBA233;g__JAGTQI01;s__	75.23	2.18	8.05352
2_002	Unclassified Archaea	17.76	0.93	6.20935
2_003	Unclassified Bacteria	2.43	0	4.87045
2_004	Unclassified Archaea	0	0	4.10919
2_005	d__Bacteria;p__Patescibacteria;c__Paceibacteria;o__Paceibacterales;f__GBS-2;g__GBS-2;s__	70.98	0	3.81738
2_006	Unclassified Archaea	4.17	0	3.86831
2_007	d__Archaea;p__Thermoproteota;c__Bathyarchaeia;o__Bathyarchaeales;f__UBA233;g__JAGTQI01;s__	25.24	5.83	3.00871
2_008	d__Bacteria;p__Bipolaricaulota;c__Bipolaricaulia;o__RBG-16-55-9;f__JANLFV01;g__JANLFV01;s__	71.36	0	2.25065
2_009	d__Archaea;p__Thermoproteota;c__Bathyarchaeia;o__Bathyarchaeales;f__UBA233;g__JAGTQI01;s__	79.44	9.42	2.40729
2_010	d__Archaea;p__Thermoproteota;c__Bathyarchaeia;o__B24;f__B24;g__DTBU01;s__	83.33	1.94	1.96902
2_011	d__Archaea;p__Thermoproteota;c__Nitrososphaeria_A;o__Caldarchaeales;f__;g__;s__	24.66	0	1.98456
2_012	d__Archaea;p__Aenigmatarchaeota;c__Aenigmatarchaeia;o__CG10238-14;f__SCSR01;g__;s__	79.91	6.23	1.68887
2_013	d__Archaea;p__Thermoproteota;c__Bathyarchaeia;o__Bathyarchaeales;f__UBA233;g__JAGTQI01;s__	3.85	0	1.77294
2_014	d__Archaea;p__Thermoproteota;c__Nitrososphaeria_A;o__Caldarchaeales;f__;g__;s__	72.31	8.74	1.60932
2_015	d__Archaea;p__Thermoproteota;c__Bathyarchaeia;o__Bathyarchaeales;f__B26-1;g__DTEX01;s__DTEX01 sp018396435	92.23	20.71	1.63688
2_016	d__Bacteria;p__Bipolaricaulota;c__Bipolaricaulia;o__Bipolaricaulales;f__Bipolaricaulaceae;g__DTER01;s__	82.2	13.71	1.52307
2_017	d__Bacteria;p__Bipolaricaulota;c__Bipolaricaulia;o__RBG-16-55-9;f__JANLFV01;g__JANLFV01;s__	25.42	1.69	1.48694
2_018	d__Archaea;p__Thermoproteota;c__Bathyarchaeia;o__Bathyarchaeales;f__UBA233;g__JAGTQI01;s__	83.18	9.42	1.49914
2_019	d__Archaea;p__Thermoproteota;c__EX4484-205;o__EX4484-205;f__JAAOZP01;g__JAAOZP01;s__	81.72	5.02	1.20342
2_020	Unclassified Archaea	2.88	0	1.03832
2_021	d__Archaea;p__Thermoproteota;c__Nitrososphaeria_A;o__Caldarchaeales;f__;g__;s__	70.69	6.31	0.965292
2_022	d__Archaea;p__Thermoproteota;c__Bathyarchaeia;o__TCS64;f__TCS64;g__JAGTRB01;s__JAGTRB01 sp018396865	95.79	4.21	0.852677
2_023	d__Archaea;p__Thermoproteota;c__EX4484-205;o__EX4484-205;f__;g__;s__	34.11	6.07	0.902816
2_024	d__Archaea;p__Thermoplasmatota;c__E2;o__UBA202;f__JdFR-43;g__JACIWB01;s__	97.2	2.4	0.824898
2_025	d__Archaea;p__Thermoproteota;c__Bathyarchaeia;o__B24;f__JAGTQN01;g__JAGTQN01;s__	90.19	7.94	0.802526
2_026	d__Archaea;p__Thermoproteota;c__EX4484-205;o__EX4484-205;f__JAAOZO01;g__;s__	68.45	2.91	0.75504
2_027	d__Archaea;p__Thermoproteota;c__Bathyarchaeia;o__Bathyarchaeales;f__UBA233;g__JABFQN01;s__	88.71	34.51	0.913731
2_028	d__Archaea;p__Thermoproteota;c__Bathyarchaeia;o__Bathyarchaeales;f__UBA233;g__;s__	46.73	3.74	0.994822
2_029	d__Archaea;p__Thermoproteota;c__EX4484-205;o__EX4484-205;f__JAAOZP01;g__JAAOZP01;s__	72.82	18.45	0.589381
2_030	d__Archaea;p__Thermoproteota;c__Bathyarchaeia;o__Bathyarchaeales;f__UBA233;g__;s__	51.4	26.17	0.770005
2_031	d__Archaea;p__Thermoproteota;c__Bathyarchaeia;o__Bathyarchaeales;f__UBA233;g__JASEJA01;s__	89.72	7.01	0.94613
2_032	d__Archaea;p__Thermoproteota;c__EX4484-205;o__EX4484-205;f__JAAOZP01;g__JAAOZP01;s__	47.25	3.88	0.495255
2_033	Unclassified Archaea	6.8	2.91	0.474225
2_034	d__Bacteria;p__Acidobacteriota;c__Aminicenantia;o__Aminicenantales;f__CALLJL01;g__CALLJL01;s__	90.04	10.43	0.450842
2_035	d__Archaea;p__Thermoproteota;c__Bathyarchaeia;o__40CM-2-53-6;f__CALIRQ01;g__CALIRQ01;s__	95.33	40.13	0.438462
2_036	d__Bacteria;p__Nitrospirota;c__Thermodesulfovibrionia;o__Thermodesulfovibrionales;f__Thermodesulfovibrionaceae;g__Thermodesulfovibrio;s__	85.26	4.04	0.460615
2_037	d__Bacteria;p__Nitrospirota;c__Thermodesulfovibrionia;o__Thermodesulfovibrionales;f__Thermodesulfovibrionaceae;g__Thermodesulfovibrio;s__	86.79	4.89	0.384118
2_038	d__Archaea;p__Thermoproteota;c__Nitrososphaeria;o__JACIWG01;f__JACIWG01;g__JACIWG01;s__	71.84	2.91	0.403867
2_039	d__Bacteria;p__WOR-3;c__WOR-3;o__UBA2258;f__UBA2258;g__JAOABP01;s__	94.38	6.18	0.389108
2_040	d__Bacteria;p__JACIXR01;c__JACIXR01;o__JACIXR01;f__JACIXR01;g__JACIXR01;s__	93.06	0.1	0.375387
2_041	d__Archaea;p__Thermoproteota;c__EX4484-205;o__EX4484-205;f__JAAOZP01;g__JAAOZP01;s__	81.23	11	0.380971
2_042	d__Archaea;p__Methanobacteriota;c__Methanobacteria;o__Methanobacteriales;f__DSM-23052;g__Methanothermobacter_A;s__Methanothermobacter_A sp030055615	99.2	2.8	0.367848
2_043	d__Archaea;p__Thermoproteota;c__Bathyarchaeia;o__Bathyarchaeales;f__UBA233;g__JAGTQI01;s__	34.51	11.79	0.430748
2_044	Unclassified Archaea	0	0	0.334055
2_045	d__Archaea;p__Thermoproteota;c__EX4484-205;o__EX4484-205;f__JAAOZP01;g__JAAOZP01;s__	51.09	5.3	0.255409
2_046	d__Archaea;p__Hadarchaeota;c__Hadarchaeia;o__Hadarchaeales;f__;g__;s__	90.65	3.12	0.262989
2_047	d__Archaea;p__Aenigmatarchaeota;c__Aenigmatarchaeia;o__CG10238-14;f__SCSR01;g__;s__	77.57	12.98	0.258533
2_048	Unclassified	0	0	0.261673
2_049	d__Bacteria;p__Patescibacteria;c__Paceibacteria;o__Paceibacterales;f__GBS-2;g__GBS-2;s__	70.98	5.17	0.261185
2_050	Unclassified Archaea	0	0	0.304085
2_051	d__Archaea;p__Thermoproteota;c__Bathyarchaeia;o__Bathyarchaeales;f__UBA233;g__;s__	29.6	10.42	0.388595
2_052	Unclassified Archaea	5.49	2.91	0.342866
2_053	d__Archaea;p__Thermoproteota;c__Thermoprotei_A;o__Sulfolobales;f__NBVN01;g__Zestosphaera;s__	98.1	3.67	0.239162
2_054	d__Archaea;p__Halobacteriota;c__Syntropharchaeia;o__Alkanophagales;f__Methanospirareceae;g__ANME-1-THS;s__	89.65	3.59	0.239421
2_055	d__Bacteria;p__WOR-3;c__WOR-3;o__SM23-42;f__JAOAFX01;g__;s__	96.64	1.1	0.227745
2_056	Unclassified Archaea	13.67	0	0.242526
2_057	d__Bacteria;p__UBA6262;c__UBA6262;o__WVXT01;f__WVXT01;g__;s__	95.06	3.93	0.217731
2_058	d__Archaea;p__Thermoproteota;c__Bathyarchaeia;o__Bathyarchaeales;f__B26-1;g__DTEX01;s__	38.32	1.87	0.247117
2_059	Unclassified Archaea	9.71	0	0.208093
2_060	d__Bacteria;p__Chloroflexota;c__Anaerolineae;o__UBA2200;f__UBA2200;g__JACIWX01;s__	89.45	5.05	0.198926
2_061	d__Bacteria;p__UBP4;c__UBA4092;o__;f__;g__;s__	97.75	2.25	0.186785
2_062	d__Bacteria;p__Atribacterota;c__Atribacteria;o__Atribacterales;f__Caldatribacteriaceae;g__;s__	96.55	15.23	0.188436
2_063	d__Archaea;p__Thermoproteota;c__Bathyarchaeia;o__40CM-2-53-6;f__DTGE01;g__DTGE01;s__DTGE01 sp018396725	96.26	13.55	0.190659
2_064	d__Bacteria;p__WOR-3;c__WOR-3;o__UBA2258;f__CAIPLT01;g__;s__	94.32	1.12	0.169627
2_065	d__Archaea;p__Halobacteriota;c__Methanosarcinia;o__Methanotrichales;f__Methanotrichaceae;g__Methanothrix_B;s__Methanothrix_B sp030055635	100	1.31	0.163366
2_066	d__Archaea;p__Thermoproteota;c__Nitrososphaeria;o__Nitrososphaerales;f__JACAEJ01;g__JACAEJ01;s__	93.69	5.83	0.165877
2_067	d__Archaea;p__Thermoproteota;c__Bathyarchaeia;o__40CM-2-53-6;f__DTGE01;g__;s__	88.35	7.36	0.161675
2_068	d__Bacteria;p__Acidobacteriota;c__Thermoanaerobaculia;o__UBA2201;f__;g__;s__	50.77	0	0.147133
2_069	d__Bacteria;p__Chloroflexota;c__Anaerolineae;o__DTPP01;f__DTPP01;g__;s__	90	14.37	0.150906
2_070	d__Bacteria;p__Acidobacteriota;c__Thermoanaerobaculia;o__UBA2201;f__UBA2201;g__;s__	43.1	0	0.142264
2_071	d__Archaea;p__Thermoproteota;c__Nitrososphaeria;o__JACIWG01;f__JACIWG01;g__JACIWG01;s__JACIWG01 sp029776125	72.82	10.19	0.160595
2_072	d__Bacteria;p__Acidobacteriota;c__Terriglobia;o__Bryobacterales;f__Bryobacteraceae;g__DTHT01;s__	96.58	3.59	0.135277
2_073	d__Bacteria;p__Desulfobacterota_G;c__Syntrophorhabdia;o__Syntrophorhabdales;f__JANXAF01;g__JAOADT01;s__	96.75	11.25	0.134586
2_074	d__Archaea;p__Thermoproteota;c__Methanomethylicia;o__CALHIW01;f__CALHIW01;g__CALHIW01;s__	86.92	4.67	0.133732
2_075	Unclassified Archaea	2.18	0	0.140439
2_076	d__Archaea;p__Aenigmatarchaeota;c__Aenigmatarchaeia;o__CG10238-14;f__SCSR01;g__;s__	28.1	10.72	0.13599
2_077	d__Archaea;p__Thermoproteota;c__EX4484-205;o__EX4484-205;f__JAAOZP01;g__JAAOZP01;s__	45.48	20.42	0.142194
2_078	d__Archaea;p__Thermoproteota;c__Bathyarchaeia;o__Bathyarchaeales;f__UBA233;g__;s__	45.4	15.11	0.248052
2_079	d__Archaea;p__Aenigmatarchaeota;c__Aenigmatarchaeia;o__CG10238-14;f__CG10238-14;g__;s__	56.73	13.33	0.162139
2_080	d__Bacteria;p__Caldisericota;c__Caldisericia;o__B22-G15;f__B22-G15;g__JAAYUH01;s__	87.6	6.25	0.122593
2_081	d__Bacteria;p__Chloroflexota;c__Chloroflexia;o__DTKN01;f__DTKN01;g__;s__	92.66	3.78	0.111973
2_082	d__Archaea;p__Thermoproteota;c__Bathyarchaeia;o__Bathyarchaeales;f__UBA233;g__DRVV01;s__	30.1	0.97	0.152822
2_083	d__Bacteria;p__Actinomycetota;c__Aquicultoria;o__SKW223;f__CALKMS01;g__CALKMS01;s__	95.51	7.58	0.111323
2_084	d__Bacteria;p__Desulfobacterota;c__BSN033;o__BSN033;f__UBA1163;g__CALIBK01;s__	92.77	3.92	0.109763
2_085	d__Archaea;p__Asgardarchaeota;c__Jordarchaeia;o__Jordarchaeales;f__Jordarchaeaceae;g__Jordarchaeum;s__	18.54	0	0.112322
2_086	Unclassified Archaea	4.17	0	0.107557
2_087	d__Archaea;p__Thermoproteota;c__Methanomethylicia;o__Culexarchaeales;f__Culexarchaeaceae;g__;s__	19.42	0	0.111105
2_088	d__Archaea;p__Thermoproteota;c__EX4484-205;o__EX4484-205;f__JAAOZP01;g__JAAOZP01;s__	63.63	51.46	0.115385
2_089	d__Archaea;p__Thermoproteota;c__Methanomethylicia;o__Culexarchaeales;f__Culexarchaeaceae;g__;s__	67.91	14.95	0.097645
2_090	d__Archaea;p__Thermoproteota;c__Nitrososphaeria_A;o__Caldarchaeales;f__Wolframiiraptoraceae;g__Wolframiiraptor;s__	97.09	4.69	0.0983617
2_091	d__Bacteria;p__Chloroflexota;c__Anaerolineae;o__Aggregatilineales;f__UBA3940;g__UBA3940;s__	89.09	3.18	0.0963051
2_092	d__Archaea;p__Aenigmatarchaeota;c__Aenigmatarchaeia;o__CG10238-14;f__SCSR01;g__;s__	36.45	10.98	0.109766
2_093	d__Archaea;p__Thermoproteota;c__Thermoprotei_A;o__Sulfolobales;f__NBVN01;g__DTCV01;s__	95.09	2.61	0.0928858
2_094	d__Bacteria;p__Patescibacteria;c__Paceibacteria;o__Paceibacterales;f__GBS-2;g__CALHEE01;s__	40.1	1.72	0.098323
2_095	d__Bacteria;p__Patescibacteria;c__Paceibacteria;o__Paceibacterales;f__GBS-2;g__GBS-2;s__	59.77	1.9	0.0921861
2_096	d__Archaea;p__Thermoproteota;c__Nitrososphaeria;o__Nitrososphaerales;f__JACAEJ01;g__JACAEJ01;s__	63.87	7.28	0.0849801
2_097	Unclassified Archaea	7.08	0	0.170229
2_098	d__Archaea;p__Thermoproteota;c__Methanomethylicia;o__Methanomethylicales;f__Methanomethylicaceae;g__;s__	99.07	46.73	0.0971274
2_099	d__Archaea;p__Thermoplasmatota;c__E2;o__DHVEG-1;f__;g__;s__	93.72	29.61	0.0933588
2_100	d__Bacteria;p__WOR-3;c__WOR-3;o__UBA2258;f__;g__;s__	93.19	0.07	0.0876446
2_101	d__Bacteria;p__Patescibacteria;c__Paceibacteria;o__Paceibacterales;f__GBS-2;g__CALHEE01;s__	40.67	16.8	0.0880376
2_102	d__Bacteria;p__Chloroflexota;c__Anaerolineae;o__UBA2200;f__UBA2200;g__JACIWX01;s__	83.03	18.51	0.0922691
2_103	d__Archaea;p__Thermoproteota;c__Bathyarchaeia;o__B24;f__DRYS01;g__DRYS01;s__	95.33	0.93	0.0866857
2_104	d__Archaea;p__Aenigmatarchaeota;c__Aenigmatarchaeia;o__CG10238-14;f__SCSR01;g__;s__	30.25	0	0.0733403
2_105	d__Archaea;p__Aenigmatarchaeota;c__Aenigmatarchaeia;o__CG10238-14;f__SCSR01;g__;s__	72.93	53.81	0.0841896
2_106	d__Bacteria;p__Patescibacteria;c__Paceibacteria;o__UBA6257;f__JAAZHW01;g__;s__	86.21	40.49	0.0833636
2_107	d__Bacteria;p__Verrucomicrobiota;c__Verrucomicrobiae;o__Limisphaerales;f__DTLC01;g__DTLC01;s__	94.59	6.02	0.0794239
2_108	d__Archaea;p__Thermoproteota;c__Bathyarchaeia;o__Bathyarchaeales;f__B26-1;g__;s__	53.25	5.61	0.0942404
2_109	Unclassified Bacteria	3.06	0	0.0836329
2_110	d__Archaea;p__Thermoproteota;c__Bathyarchaeia;o__Bathyarchaeales;f__B24-2;g__B24-2;s__	91.74	9.49	0.0791722
2_111	Unclassified Archaea	0	0	0.11433
2_112	d__Archaea;p__Aenigmatarchaeota;c__Aenigmatarchaeia;o__CG10238-14;f__SCSR01;g__;s__	28.35	12.46	0.0750251
2_113	Unclassified Archaea	4.67	0.93	0.074625
2_114	d__Archaea;p__Thermoproteota;c__Bathyarchaeia;o__Bathyarchaeales;f__B26-1;g__;s__	47.65	16.34	0.116842
2_115	d__Bacteria;p__DUMJ01;c__DUMJ01;o__DUMJ01;f__DUMJ01;g__DUMJ01;s__	94.67	5.02	0.0710874
2_116	d__Bacteria;p__Patescibacteria;c__Microgenomatia;o__PFEM01;f__;g__;s__	27.98	13.12	0.0776811
2_117	d__Archaea;p__Aenigmatarchaeota;c__Aenigmatarchaeia;o__CG10238-14;f__SCSR01;g__;s__	42.56	18.45	0.0709759
2_118	Unclassified Archaea	0	0	0.230777
2_119	d__Archaea;p__Thermoproteota;c__Nitrososphaeria_A;o__Caldarchaeales;f__Calditenuaceae;g__CALIKS01;s__	44.14	8.87	0.0842223
2_120	d__Archaea;p__Methanobacteriota;c__Methanobacteria;o__Methanobacteriales;f__DSM-23052;g__Methanothermobacter_A;s__	66.4	2.4	0.0696933
2_121	d__Archaea;p__Thermoproteota;c__Bathyarchaeia;o__Bathyarchaeales;f__UBA233;g__;s__	22.84	17.36	0.197905
2_122	d__Archaea;p__Aenigmatarchaeota;c__Aenigmatarchaeia;o__CG10238-14;f__;g__;s__	27.83	15.05	0.11296
2_123	d__Archaea;p__Thermoproteota;c__Bathyarchaeia;o__Bathyarchaeales;f__UBA233;g__JASEJA01;s__	31.62	25.23	0.470126
2_124	d__Archaea;p__Thermoproteota;c__EX4484-205;o__EX4484-205;f__JAAOZP01;g__JAAOZP01;s__	39.81	7.09	0.0676416
2_125	Unclassified Archaea	4.05	0	0.0699467
2_126	d__Archaea;p__Thermoproteota;c__Bathyarchaeia;o__Bathyarchaeales;f__UBA233;g__WUQU01;s__	28.97	16.97	0.168739
2_127	Unclassified Archaea	3.4	0	0.105853
2_128	Unclassified Archaea	8.8	0.46	0.114435
2_129	d__Archaea;p__Thermoplasmatota;c__DTKX01;o__DTKX01;f__VGTL01;g__;s__	53.86	8.58	0.0660364
2_130	Unclassified Archaea	9.71	0.97	0.0696029
2_131	d__Bacteria;p__Poribacteria;c__DTPJ01;o__DTPJ01;f__DTPJ01;g__;s__	38.14	0.5	0.0595305
2_132	d__Archaea;p__Thermoproteota;c__Bathyarchaeia;o__Bathyarchaeales;f__B26-1;g__JANXEA01;s__	42.39	20.17	0.0782962
2_133	d__Archaea;p__Aenigmatarchaeota;c__Aenigmatarchaeia;o__Aenigmatarchaeales;f__Aenigmatarchaeaceae;g__;s__	52.8	6.7	0.0592273
2_134	d__Archaea;p__Thermoproteota;c__Bathyarchaeia;o__Bathyarchaeales;f__UBA233;g__;s__	25.06	10.34	0.314593
2_135	d__Bacteria;p__Poribacteria;c__DTPJ01;o__DTPJ01;f__DTPJ01;g__;s__	26.18	0	0.0586299
2_136	Unclassified Archaea	6.31	0	0.103822
2_137	Unclassified Archaea	0	0	0.225429
2_138	d__Bacteria;p__Chloroflexota;c__Chloroflexia;o__DTKN01;f__DTKN01;g__;s__	80.23	9.29	0.0621243
2_139	d__Bacteria;p__Planctomycetota;c__Planctomycetia;o__Pirellulales;f__Thermoguttaceae;g__DTLM01;s__	81.97	5.72	0.0574082
2_140	d__Archaea;p__Asgardarchaeota;c__Odinarchaeia;o__Odinarchaeales;f__Odinarchaeaceae;g__;s__	33.82	6.63	0.0619386
2_141	d__Bacteria;p__Armatimonadota;c__DTGP01;o__DTGP01;f__;g__;s__	86.71	5.86	0.057325
2_142	d__Archaea;p__Hadarchaeota;c__Hadarchaeia;o__Hadarchaeales;f__Hadarchaeaceae;g__;s__	73.66	26.87	0.0596971
2_143	d__Archaea;p__Thermoproteota;c__Bathyarchaeia;o__Bathyarchaeales;f__UBA233;g__JAGTQX01;s__	30.84	6.07	0.152161
2_144	d__Bacteria;p__WOR-3;c__WOR-3;o__UBA2258;f__UBA2258;g__;s__	65.41	7.31	0.0581452
2_145	Unclassified Archaea	4.17	0	0.337563
2_146	d__Bacteria;p__Chloroflexota;c__Anaerolineae;o__UBA2200;f__UBA2200;g__;s__	29.36	6.61	0.0535026
2_147	d__Archaea;p__Hadarchaeota;c__Hadarchaeia;o__Hadarchaeales;f__Hadarchaeaceae;g__;s__	48.53	8.47	0.0580112
2_148	d__Archaea;p__Thermoproteota;c__Bathyarchaeia;o__Bathyarchaeales;f__B26-1;g__;s__	68.93	35.86	0.0647662
2_149	Unclassified Archaea	0	0	0.108203
2_150	Unclassified Archaea	0	0	0.0816639
2_151	d__Archaea;p__Thermoproteota;c__Bathyarchaeia;o__Bathyarchaeales;f__UBA233;g__WUQU01;s__	42.65	44.39	0.197706
2_152	Unclassified Archaea	9.35	2.18	0.261493
2_153	d__Archaea;p__Thermoproteota;c__Nitrososphaeria_A;o__Caldarchaeales;f__;g__;s__	37.79	9.34	0.0579867
2_154	d__Archaea;p__Thermoproteota;c__Bathyarchaeia;o__Bathyarchaeales;f__UBA233;g__;s__	29.67	33.02	0.266708
2_155	Unclassified Archaea	8.33	4.17	0.205841
2_156	Unclassified Archaea	14.02	4.67	0.137666
2_157	d__Archaea;p__Thermoproteota;c__Bathyarchaeia;o__Bathyarchaeales;f__;g__;s__	45.96	6.22	0.0564693
2_158	d__Bacteria;p__JACIXR01;c__JACIXR01;o__JACIXR01;f__JACIXR01;g__JACIXR01;s__	56.79	3.76	0.0520263
2_159	d__Archaea;p__Thermoproteota;c__Bathyarchaeia;o__Bathyarchaeales;f__B26-1;g__;s__	54.16	22.45	0.0559422
2_160	d__Archaea;p__Thermoproteota;c__Bathyarchaeia;o__Bathyarchaeales;f__UBA233;g__DRVP01;s__	21.83	13.11	0.206239
2_161	Unclassified Archaea	2.34	0.07	0.165425
2_162	Unclassified Archaea	9.58	0	0.154029
2_163	Unclassified Archaea	4.17	4.17	0.407856
2_164	d__Bacteria;p__Armatimonadota;c__JAAZEB01;o__JAAZEB01;f__;g__;s__	59.65	24.91	0.0488029
2_165	d__Archaea;p__Thermoproteota;c__Bathyarchaeia;o__RBG-16-48-13;f__;g__;s__	54.94	10.92	0.0514406
2_166	d__Bacteria;p__Armatimonadota;c__UBA5377;o__UBA5377;f__FEN-943;g__;s__	42.58	10.29	0.0473759
2_167	d__Archaea;p__Hadarchaeota;c__Hadarchaeia;o__Hadarchaeales;f__Hadarchaeaceae;g__Hadarchaeum;s__	40.63	11.29	0.0474101
2_168	d__Bacteria;p__Poribacteria;c__DTPJ01;o__DTPJ01;f__DTPJ01;g__;s__	39.96	3.76	0.0443962
2_169	d__Bacteria;p__Planctomycetota;c__UBA8108;o__UBA8108;f__SXIK01;g__;s__	51.96	8.91	0.0438639
2_170	d__Bacteria;p__Actinomycetota;c__Aquicultoria;o__SKW223;f__SKW223;g__;s__	12.66	0.1	0.040373
2_171	Unclassified Bacteria	4.17	0	0.0378176
Unmapped				11.8286

## Sheet: Fig. 1b_control-r2
Bin Id	Classification	Completeness (%)	Contamination (%)	Relative Abundance in metagenome (%)
3_001	d__Archaea;p__Thermoproteota;c__Bathyarchaeia;o__Bathyarchaeales;f__UBA233;g__JAGTQI01;s__	80.64	0.93	9.447
3_002	d__Archaea;p__Thermoproteota;c__Bathyarchaeia;o__Bathyarchaeales;f__UBA233;g__JAGTQI01;s__	98.13	18.87	6.42346
3_003	d__Bacteria;p__Nitrospirota;c__Thermodesulfovibrionia;o__Thermodesulfovibrionales;f__Thermodesulfovibrionaceae;g__Thermodesulfovibrio;s__	99.08	0.2	3.74928
3_004	d__Archaea;p__Thermoproteota;c__Bathyarchaeia;o__Bathyarchaeales;f__UBA233;g__JAGTQI01;s__	17.34	2.8	3.89466
3_005	d__Archaea;p__Thermoproteota;c__Nitrososphaeria_A;o__Caldarchaeales;f__;g__;s__	93.24	4.53	2.46346
3_006	d__Archaea;p__Thermoproteota;c__Bathyarchaeia;o__B24;f__B24;g__DTBU01;s__	94.86	1.87	2.26039
3_007	d__Archaea;p__Thermoproteota;c__Bathyarchaeia;o__Bathyarchaeales;f__UBA233;g__JAGTQI01;s__	83.5	11.73	2.50054
3_008	d__Archaea;p__Thermoproteota;c__Thermoprotei_A;o__Sulfolobales;f__NBVN01;g__Zestosphaera;s__	98.1	0.63	2.06303
3_009	d__Bacteria;p__Bipolaricaulota;c__Bipolaricaulia;o__Bipolaricaulales;f__Bipolaricaulaceae;g__DTER01;s__	86.44	5.24	1.80351
3_010	d__Archaea;p__Thermoproteota;c__EX4484-205;o__EX4484-205;f__JAAOZP01;g__JAAOZP01;s__	83.98	9.71	1.6117
3_011	d__Archaea;p__Thermoproteota;c__Bathyarchaeia;o__Bathyarchaeales;f__B26-1;g__DTEX01;s__DTEX01 sp018396435	85.36	8.41	1.62927
3_012	d__Bacteria;p__Acidobacteriota;c__Aminicenantia;o__Aminicenantales;f__CALLJL01;g__CALLJL01;s__	86.13	6.01	1.45192
3_013	d__Archaea;p__Thermoproteota;c__Bathyarchaeia;o__Bathyarchaeales;f__UBA233;g__JAGTQI01;s__	24.84	10.28	1.53547
3_014	d__Archaea;p__Thermoproteota;c__EX4484-205;o__EX4484-205;f__;g__;s__	15.66	0	1.14799
3_015	d__Archaea;p__Thermoproteota;c__Nitrososphaeria_A;o__Caldarchaeales;f__;g__;s__	88.39	14.56	0.875769
3_016	d__Archaea;p__Thermoproteota;c__EX4484-205;o__EX4484-205;f__JAAOZO01;g__;s__	80.58	9.22	0.86774
3_017	d__Bacteria;p__Patescibacteria;c__Paceibacteria;o__Paceibacterales;f__GBS-2;g__CALHEE01;s__	58.12	0	0.823915
3_018	d__Archaea;p__Thermoproteota;c__Bathyarchaeia;o__Bathyarchaeales;f__UBA233;g__;s__	33.18	0.93	1.06916
3_019	d__Archaea;p__Thermoproteota;c__Bathyarchaeia;o__Bathyarchaeales;f__UBA233;g__JABFQN01;s__	64	22.33	0.984072
3_020	d__Bacteria;p__WOR-3;c__WOR-3;o__UBA2258;f__CAIPLT01;g__;s__	94.32	1.12	0.772083
3_021	d__Archaea;p__Thermoproteota;c__Bathyarchaeia;o__TCS64;f__TCS64;g__JAGTRB01;s__JAGTRB01 sp018396865	95.79	1.4	0.772038
3_022	d__Archaea;p__Thermoproteota;c__EX4484-205;o__EX4484-205;f__JAAOZP01;g__JAAOZP01;s__	87.38	8.74	0.766301
3_023	d__Archaea;p__Thermoproteota;c__Bathyarchaeia;o__B24;f__JAGTQN01;g__JAGTQN01;s__	91.12	10.12	0.767924
3_024	Unclassified Archaea	11.21	2.8	0.862372
3_025	Unclassified Archaea	13.08	3.74	0.926623
3_026	d__Bacteria;p__Bipolaricaulota;c__Bipolaricaulia;o__RBG-16-55-9;f__JANLFV01;g__JANLFV01;s__	86.44	12.71	0.732999
3_027	d__Archaea;p__Thermoproteota;c__Bathyarchaeia;o__Bathyarchaeales;f__UBA233;g__JABFQN01;s__	45.33	8.41	0.889951
3_028	d__Archaea;p__Thermoproteota;c__Bathyarchaeia;o__Bathyarchaeales;f__UBA233;g__;s__	21.36	1.05	0.892392
3_029	Unclassified Bacteria	15.34	8.28	0.646231
3_030	d__Bacteria;p__WOR-3;c__WOR-3;o__UBA2258;f__UBA2258;g__JAOABP01;s__	95.51	1.69	0.577196
3_031	d__Archaea;p__Thermoproteota;c__Bathyarchaeia;o__Bathyarchaeales;f__B26-1;g__DTEX01;s__DTEX01 sp018396795	98.6	24.77	0.548285
3_032	d__Archaea;p__Thermoproteota;c__Bathyarchaeia;o__Bathyarchaeales;f__UBA233;g__JAGTQI01;s__	10.12	2.91	0.602821
3_033	d__Archaea;p__Halobacteriota;c__Syntropharchaeia;o__Alkanophagales;f__Methanospirareceae;g__ANME-1-THS;s__	89.87	4.25	0.471581
3_034	d__Archaea;p__Thermoproteota;c__Bathyarchaeia;o__Bathyarchaeales;f__UBA233;g__;s__	52.43	23.23	0.641569
3_035	d__Archaea;p__Halobacteriota;c__Methanosarcinia;o__Methanotrichales;f__Methanotrichaceae;g__Methanothrix_B;s__Methanothrix_B sp030055635	99.35	0.65	0.469239
3_036	d__Archaea;p__Thermoproteota;c__Bathyarchaeia;o__Bathyarchaeales;f__UBA233;g__;s__	71.03	17.29	0.574721
3_037	d__Archaea;p__Thermoproteota;c__Nitrososphaeria;o__JACIWG01;f__JACIWG01;g__JACIWG01;s__	97.09	22.33	0.484764
3_038	d__Archaea;p__Thermoproteota;c__Bathyarchaeia;o__Bathyarchaeales;f__UBA233;g__;s__	21.5	0.93	0.564609
3_039	Unclassified Archaea	14.41	1.65	0.539559
3_040	d__Archaea;p__Hadarchaeota;c__Hadarchaeia;o__Hadarchaeales;f__Hadarchaeaceae;g__CAKZTQ01;s__	84	4.8	0.3916
3_041	Unclassified Archaea	34.8	16.82	0.542832
3_042	d__Bacteria;p__Chloroflexota;c__Anaerolineae;o__UBA2200;f__UBA2200;g__JACIWX01;s__	77.52	4.22	0.386676
3_043	d__Archaea;p__Thermoproteota;c__Bathyarchaeia;o__40CM-2-53-6;f__CALIRQ01;g__CALIRQ01;s__	97.2	4.67	0.363871
3_044	d__Archaea;p__Thermoproteota;c__Methanomethylicia;o__CALHIW01;f__CALHIW01;g__CALHIW01;s__	86.92	1.87	0.347391
3_045	d__Archaea;p__Thermoproteota;c__EX4484-205;o__EX4484-205;f__JAAOZP01;g__;s__	16.5	1.94	0.370245
3_046	d__Archaea;p__Aenigmatarchaeota;c__Aenigmatarchaeia;o__CG10238-14;f__SCSR01;g__;s__	41.98	8.09	0.362043
3_047	d__Archaea;p__Thermoproteota;c__EX4484-205;o__EX4484-205;f__JAAOZP01;g__JAAOZP01;s__	69.9	13.59	0.327542
3_048	d__Bacteria;p__Desulfobacterota;c__BSN033;o__BSN033;f__UBA1163;g__CALIBK01;s__	93.42	3.87	0.310167
3_049	d__Archaea;p__Thermoproteota;c__Bathyarchaeia;o__Bathyarchaeales;f__B26-1;g__DTEX01;s__	87.85	14.41	0.291157
3_050	Unclassified Bacteria	0	0	0.359784
3_051	Unclassified Archaea	0	0	0.282288
3_052	d__Bacteria;p__Patescibacteria;c__Paceibacteria;o__Paceibacterales;f__GBS-2;g__CALHEE01;s__	59.77	7.76	0.292152
3_053	d__Archaea;p__Aenigmatarchaeota;c__Aenigmatarchaeia;o__CG10238-14;f__SCSR01;g__;s__	78.97	19.88	0.265914
3_054	d__Archaea;p__Thermoproteota;c__EX4484-205;o__EX4484-205;f__JAAOZP01;g__JAAOZP01;s__	33.66	0	0.247499
3_055	d__Archaea;p__Thermoproteota;c__EX4484-205;o__EX4484-205;f__JAAOZP01;g__JAAOZP01;s__	49.19	0	0.237194
3_056	d__Archaea;p__Thermoproteota;c__Bathyarchaeia;o__40CM-2-53-6;f__DTGE01;g__DTGE01;s__DTGE01 sp018396725	96.26	9.35	0.235402
3_057	Unclassified Bacteria	1.25	0	0.234618
3_058	d__Archaea;p__Thermoproteota;c__Nitrososphaeria;o__JACIWG01;f__JACIWG01;g__JACIWG01;s__	62.78	3.88	0.257449
3_059	d__Archaea;p__Thermoproteota;c__Bathyarchaeia;o__B24;f__DRYS01;g__DRYS01;s__	95.33	0.93	0.221112
3_060	d__Bacteria;p__Bacillota_A;c__Clostridia;o__Lachnospirales;f__Lachnospiraceae;g__Butyribacter;s__Butyribacter sp009774235	90.54	0.68	0.221699
3_061	d__Bacteria;p__UBP4;c__UBA4092;o__;f__;g__;s__	97.75	1.12	0.208497
3_062	d__Archaea;p__Aenigmatarchaeota;c__Aenigmatarchaeia;o__CG10238-14;f__SCSR01;g__;s__	16.04	2.49	0.230371
3_063	Unclassified Archaea	4.85	0	0.225387
3_064	d__Bacteria;p__Patescibacteria;c__Paceibacteria;o__Paceibacterales;f__GBS-2;g__GBS-2;s__	64.94	13.79	0.200538
3_065	d__Bacteria;p__Atribacterota;c__Atribacteria;o__Atribacterales;f__Caldatribacteriaceae;g__;s__	98.31	6.93	0.204798
3_066	d__Bacteria;p__Chloroflexota;c__Anaerolineae;o__DTPP01;f__DTPP01;g__;s__	90.37	14.45	0.202677
3_067	d__Archaea;p__Thermoproteota;c__Bathyarchaeia;o__40CM-2-53-6;f__DTGE01;g__;s__	91.52	26.83	0.198183
3_068	Unclassified Archaea	19.47	8.41	0.220302
3_069	Unclassified Archaea	15.89	7.48	0.199511
3_070	Unclassified	0	0	0.385352
3_071	d__Bacteria;p__Patescibacteria;c__Paceibacteria;o__Paceibacterales;f__GBS-2;g__CALHEE01;s__	64.69	23.34	0.180085
3_072	d__Archaea;p__Thermoproteota;c__Bathyarchaeia;o__Bathyarchaeales;f__UBA233;g__JASEJA01;s__	22.01	13.59	0.677577
3_073	d__Archaea;p__Thermoproteota;c__Nitrososphaeria;o__JACIWG01;f__JACIWG01;g__JACIWG01;s__	32.41	9.81	0.186253
3_074	d__Archaea;p__Thermoproteota;c__Nitrososphaeria;o__Nitrososphaerales;f__JACAEJ01;g__JACAEJ01;s__	78.32	16.96	0.187987
3_075	d__Archaea;p__Thermoproteota;c__Bathyarchaeia;o__Hecatellales;f__Hecatellaceae;g__;s__	99.03	1.46	0.178593
3_076	d__Archaea;p__Aenigmatarchaeota;c__Aenigmatarchaeia;o__CG10238-14;f__SCSR01;g__;s__	16.36	7.01	0.18177
3_077	Unclassified Archaea	2.8	0	0.180928
3_078	Unclassified Archaea	4.17	0	0.172112
3_079	d__Archaea;p__Aenigmatarchaeota;c__Aenigmatarchaeia;o__CG10238-14;f__SCSR01;g__CALIKW01;s__	26.38	6.8	0.219628
3_080	d__Archaea;p__Thermoproteota;c__Methanomethylicia;o__Methanomethylicales;f__Methanomethylicaceae;g__WYZ-LMO10;s__WYZ-LMO10 sp029887795	18.69	1.87	0.192305
3_081	d__Archaea;p__Thermoproteota;c__Methanomethylicia;o__Methanomethylicales;f__Methanomethylicaceae;g__;s__	39.25	10.28	0.150844
3_082	d__Archaea;p__Thermoproteota;c__Methanomethylicia;o__Methanomethylicales;f__Methanomethylicaceae;g__WYZ-LMO10;s__	70.09	6.54	0.181518
3_083	d__Archaea;p__Thermoproteota;c__Nitrososphaeria;o__JACIWG01;f__JACIWG01;g__JACIWG01;s__	16.03	1.87	0.173668
3_084	Unclassified Archaea	10.28	0	0.22349
3_085	d__Archaea;p__Thermoproteota;c__Nitrososphaeria;o__Nitrososphaerales;f__JACAEJ01;g__JACAEJ01;s__	51.86	20.71	0.139672
3_086	d__Bacteria;p__Chloroflexota;c__Anaerolineae;o__UBA2200;f__UBA2200;g__JACIWX01;s__	69.72	33.13	0.149727
3_087	d__Bacteria;p__Chloroflexota;c__Chloroflexia;o__DTKN01;f__DTKN01;g__;s__	93.58	15.04	0.135717
3_088	Unclassified	0	0	0.250901
3_089	d__Bacteria;p__Desulfobacterota_G;c__Syntrophorhabdia;o__Syntrophorhabdales;f__JANXAF01;g__JAOADT01;s__	92.86	8.13	0.131352
3_090	d__Archaea;p__Thermoproteota;c__Nitrososphaeria_A;o__Caldarchaeales;f__Wolframiiraptoraceae;g__Wolframiiraptor;s__	97.09	5.34	0.125539
3_091	d__Archaea;p__Thermoplasmatota;c__Thermoplasmata;o__Methanomassiliicoccales;f__JACIVX01;g__JACIVX01;s__	100	1.8	0.12361
3_092	d__Bacteria;p__Chloroflexota;c__Anaerolineae;o__SpSt-313;f__SpSt-313;g__JAKPJZ01;s__	69.51	6.61	0.132337
3_093	Unclassified Archaea	0	0	0.244849
3_094	d__Archaea;p__Hadarchaeota;c__Hadarchaeia;o__Hadarchaeales;f__;g__;s__	89.72	1.87	0.117813
3_095	d__Bacteria;p__Bipolaricaulota;c__Bipolaricaulia;o__RBG-16-55-9;f__JANLFV01;g__JANLFV01;s__	63.1	9.8	0.119504
3_096	d__Archaea;p__Thermoproteota;c__Bathyarchaeia;o__40CM-2-53-6;f__RBG-13-38-9;g__DTMT01;s__DTMT01 sp018396915	89.72	49.53	0.114342
3_097	d__Archaea;p__Methanobacteriota;c__Methanobacteria;o__Methanobacteriales;f__DSM-23052;g__Methanothermobacter_A;s__Methanothermobacter_A sp030055615	87.37	5.24	0.111837
3_098	Unclassified Bacteria	0	0	0.113295
3_099	d__Bacteria;p__Caldisericota;c__Caldisericia;o__B22-G15;f__B22-G15;g__JAAYUH01;s__	82.22	26.25	0.108494
3_100	d__Bacteria;p__WOR-3;c__WOR-3;o__UBA2258;f__DTDR01;g__DTDR01;s__	76.3	9.05	0.103172
3_101	d__Bacteria;p__Acidobacteriota;c__Terriglobia;o__Bryobacterales;f__Bryobacteraceae;g__DTHT01;s__	88.03	16.96	0.107322
3_102	Unclassified Archaea	13.66	5.37	0.319475
3_103	d__Archaea;p__Thermoproteota;c__Bathyarchaeia;o__Bathyarchaeales;f__UBA233;g__WUQU01;s__	32.55	19.63	0.266788
3_104	d__Archaea;p__Hadarchaeota;c__Hadarchaeia;o__Hadarchaeales;f__Hadarchaeaceae;g__;s__	66.94	2.8	0.105609
3_105	d__Bacteria;p__Chloroflexota;c__Anaerolineae;o__UBA2200;f__JACIWT01;g__JACIWT01;s__	75.23	8.95	0.103983
3_106	d__Bacteria;p__Chloroflexota;c__Dehalococcoidia;o__GIF9;f__UBA5620;g__CALJTV01;s__	59.28	28.75	0.10007
3_107	d__Archaea;p__Thermoproteota;c__EX4484-205;o__EX4484-205;f__JAAOZP01;g__JAAOZP01;s__	59.15	39.36	0.106411
3_108	d__Archaea;p__Thermoproteota;c__EX4484-205;o__EX4484-205;f__JAAOZO01;g__;s__	14.07	3.06	0.117836
3_109	d__Bacteria;p__Verrucomicrobiota;c__Verrucomicrobiae;o__Limisphaerales;f__DTLC01;g__DTLC01;s__	91.89	20.72	0.0975097
3_110	Unclassified Archaea	0.31	0	0.168316
3_111	d__Archaea;p__Thermoproteota;c__EX4484-205;o__EX4484-205;f__JAAOZP01;g__JAAOZP01;s__	49.45	30.06	0.10085
3_112	d__Archaea;p__Hadarchaeota;c__Hadarchaeia;o__Hadarchaeales;f__Hadarchaeaceae;g__;s__	52.73	9.24	0.101155
3_113	d__Bacteria;p__Verrucomicrobiota;c__Verrucomicrobiae;o__Limisphaerales;f__J093;g__JAAYVR01;s__	97.3	6.51	0.0949917
3_114	d__Archaea;p__Thermoproteota;c__Bathyarchaeia;o__Bathyarchaeales;f__UBA233;g__;s__	31.93	12.07	0.603944
3_115	Unclassified Archaea	5.03	0.14	0.141695
3_116	d__Archaea;p__Thermoproteota;c__Nitrososphaeria_A;o__Caldarchaeales;f__Calditenuaceae;g__CALIKS01;s__	61.65	17.15	0.098968
3_117	d__Archaea;p__Thermoproteota;c__Bathyarchaeia;o__Bathyarchaeales;f__UBA233;g__;s__	28.96	10.68	0.383633
3_118	d__Archaea;p__Thermoproteota;c__Bathyarchaeia;o__Bathyarchaeales;f__UBA233;g__;s__	45.87	39.25	0.330123
3_119	d__Archaea;p__Thermoproteota;c__Bathyarchaeia;o__Bathyarchaeales;f__B26-1;g__;s__	46.29	21.97	0.103285
3_120	d__Archaea;p__Thermoproteota;c__Bathyarchaeia;o__Bathyarchaeales;f__B26-1;g__DTEX01;s__	50.24	11.49	0.0943259
3_121	d__Bacteria;p__Poribacteria;c__DTPJ01;o__DTPJ01;f__DTPJ01;g__;s__	85.49	7.09	0.088092
3_122	d__Bacteria;p__WOR-3;c__WOR-3;o__UBA2258;f__;g__;s__	83.69	3.18	0.0849002
3_123	d__Archaea;p__Thermoproteota;c__Bathyarchaeia;o__Bathyarchaeales;f__UBA233;g__;s__	20.33	3.02	0.129572
3_124	d__Bacteria;p__Armatimonadota;c__UBA5377;o__UBA5377;f__FEN-943;g__JANZZA01;s__	82.29	10.58	0.0855916
3_125	Unclassified Bacteria	1.87	0	0.0872374
3_126	d__Bacteria;p__WOR-3;c__WOR-3;o__SM23-42;f__;g__;s__	38.43	1.98	0.0832411
3_127	d__Bacteria;p__Patescibacteria;c__Microgenomatia;o__UM-FILTER-40-11;f__UM-FILTER-40-11;g__;s__	43.82	8.03	0.0831832
3_128	Unclassified Archaea	0	0	0.143809
3_129	Unclassified Archaea	12.32	3.62	0.374161
3_130	Unclassified Archaea	19.58	10.19	0.318032
3_131	d__Bacteria;p__Patescibacteria;c__Microgenomatia;o__;f__;g__;s__	42.94	18.18	0.0836532
3_132	Unclassified Archaea	12.46	8.41	0.258186
3_133	Unclassified Archaea	24.37	18.38	0.400418
3_134	d__Bacteria;p__Chloroflexota;c__Anaerolineae;o__UBA2200;f__JACIWT01;g__;s__	55.6	22.86	0.0791089
3_135	Unclassified Bacteria	9.65	0	0.0836985
3_136	Unclassified	0	0	0.155303
3_137	Unclassified Archaea	4.17	0	0.152522
3_138	d__Bacteria;p__Nitrospirota;c__Thermodesulfovibrionia;o__Thermodesulfovibrionales;f__Thermodesulfovibrionaceae;g__Thermodesulfovibrio;s__	71.47	13.01	0.0769283
3_139	Unclassified	5	0	0.171458
3_140	d__Bacteria;p__Bacillota_A;c__Clostridia;o__Lachnospirales;f__Lachnospiraceae;g__Kineothrix;s__Kineothrix sp000403275	35.51	1.15	0.0807794
3_141	Unclassified Archaea	4.17	0	0.17829
3_142	d__Bacteria;p__Chloroflexota;c__Dehalococcoidia;o__GIF9;f__UBA5620;g__CALJTV01;s__	24.01	0.99	0.077586
3_143	d__Bacteria;p__Bacillota_A;c__Clostridia;o__Lachnospirales;f__Lachnospiraceae;g__COE1;s__COE1 sp009774395	46.37	1.51	0.0763267
3_144	Unclassified Archaea	17.91	6.54	0.252211
3_145	d__Bacteria;p__Chloroflexota;c__Anaerolineae;o__JAAYZQ01;f__JAAYZQ01;g__TumbabinsA96;s__	66.42	7.99	0.0739086
3_146	Unclassified Archaea	15.26	0.93	0.266036
3_147	d__Bacteria;p__Bacillota_A;c__Clostridia;o__Lachnospirales;f__Lachnospiraceae;g__COE1;s__COE1 sp009774395	12.28	0	0.0742083
3_148	d__Bacteria;p__WOR-3;c__WOR-3;o__SM23-42;f__JAOAFX01;g__;s__	53.68	1.66	0.0716394
3_149	d__Archaea;p__Thermoproteota;c__EX4484-205;o__EX4484-205;f__DTQO01;g__DTQO01;s__	84.02	55.94	0.0734505
3_150	d__Archaea;p__Thermoproteota;c__Bathyarchaeia;o__RBG-16-48-13;f__;g__;s__	52.59	16.77	0.0796943
3_151	d__Bacteria;p__JACIXR01;c__JACIXR01;o__JACIXR01;f__JACIXR01;g__;s__	32.13	6.9	0.0724859
3_152	Unclassified Archaea	0	0	0.154723
3_153	d__Bacteria;p__DUMJ01;c__DUMJ01;o__DUMJ01;f__DUMJ01;g__DUMJ01;s__	38.86	0.85	0.0715924
3_154	d__Bacteria;p__Bacteroidota;c__Bacteroidia;o__Bacteroidales;f__Muribaculaceae;g__Duncaniella;s__	17.32	1.15	0.0735436
3_155	d__Bacteria;p__JACIXR01;c__JACIXR01;o__JACIXR01;f__JACIXR01;g__JACIXR01;s__	52.87	10.19	0.0712759
3_156	Unclassified Bacteria	0	0	0.0931091
3_157	Unclassified Bacteria	0	0	0.113762
3_158	d__Archaea;p__Thermoproteota;c__Bathyarchaeia;o__;f__;g__;s__	59.83	23.64	0.0659915
3_159	Unclassified Bacteria	1.72	0	0.0642489
3_160	d__Bacteria;p__RBG-13-61-14;c__RBG-13-61-14;o__RBG-13-61-14;f__DRUE01;g__;s__	36.47	2.1	0.060878
3_161	d__Bacteria;p__Planctomycetota;c__Planctomycetia;o__Pirellulales;f__Thermoguttaceae;g__DTLM01;s__	50.52	8.91	0.0602151
3_162	d__Archaea;p__Thermoproteota;c__Thermoprotei_A;o__Sulfolobales;f__NBVN01;g__DTCV01;s__	32.99	0	0.0566178
3_163	d__Bacteria;p__Acidobacteriota;c__Terriglobia;o__Bryobacterales;f__Bryobacteraceae;g__DTHT01;s__	22.47	0.15	0.0593269
Unmapped				16.9539

## Sheet: Fig. 1b_oleic acid-r1
Bin Id	Classification	Completeness (%)	Contamination (%)	Relative Abundance in metagenome (%)
4_001	d__Archaea;p__Halobacteriota;c__Archaeoglobi;o__Archaeoglobales;f__Archaeoglobaceae;g__WYZ-LMO2;s__WYZ-LMO2 sp030055595	99.35	1.63	69.879
4_002	d__Bacteria;p__Thermotogota;c__Thermotogae;o__Thermotogales;f__DSM-5069;g__Pseudothermotoga_B;s__	99.84	0	14.5863
4_003	d__Bacteria;p__Nitrospirota;c__Thermodesulfovibrionia;o__Thermodesulfovibrionales;f__Thermodesulfovibrionaceae;g__Thermodesulfovibrio;s__	99.08	0	3.90843
4_004	d__Bacteria;p__Planctomycetota;c__Phycisphaerae;o__UBA1845;f__Fen-1342;g__JAAYXS01;s__	97.73	1.14	2.67277
4_005	d__Archaea;p__Methanobacteriota;c__Methanobacteria;o__Methanobacteriales;f__DSM-23052;g__Methanothermobacter_A;s__	98.4	3.84	0.838517
4_006	d__Archaea;p__Methanobacteriota;c__Methanobacteria;o__Methanobacteriales;f__DSM-23052;g__Methanothermobacter_A;s__Methanothermobacter_A sp030055615	92.86	2.59	0.502501
4_007	d__Bacteria;p__Caldisericota;c__Caldisericia;o__B22-G15;f__B22-G15;g__JAAYUH01;s__	7.14	1.3	0.683994
4_008	d__Archaea;p__Halobacteriota;c__Methanosarcinia;o__Methanotrichales;f__Methanotrichaceae;g__Methanothrix_B;s__Methanothrix_B sp030055635	100	0.65	0.433812
4_009	d__Bacteria;p__Bacillota_B;c__Syntrophomonadia;o__Syntrophomonadales;f__Syntrophomonadaceae;g__Thermosyntropha;s__	99.11	2.55	0.417552
4_010	d__Archaea;p__Thermoproteota;c__Bathyarchaeia;o__Bathyarchaeales;f__UBA233;g__JAGTQX01;s__JAGTQX01 sp018396675	60.08	0.97	0.682389
4_011	d__Bacteria;p__Bacillota_B;c__Moorellia;o__Moorellales;f__Moorellaceae;g__;s__	100	0.95	0.360536
4_012	d__Bacteria;p__Caldisericota;c__Caldisericia;o__B22-G15;f__B22-G15;g__JAAYUH01;s__	94.64	14.29	0.304332
4_013	d__Bacteria;p__DTU030;c__DTU030;o__DUMP01;f__DUMP01;g__DUMP01;s__	49.51	0.98	0.299546
4_014	d__Archaea;p__Thermoproteota;c__Thermoprotei_A;o__Sulfolobales;f__NBVN01;g__Zestosphaera;s__	98.1	8.04	0.269378
4_015	d__Bacteria;p__DTU030;c__DTU030;o__DUMP01;f__DUMP01;g__DUMP01;s__	53.16	0	0.274591
4_016	d__Bacteria;p__Acidobacteriota;c__Aminicenantia;o__Aminicenantales;f__CALLJL01;g__CALLJL01;s__	92.99	5.3	0.229893
4_017	d__Bacteria;p__WOR-3;c__WOR-3;o__SM23-42;f__JAOAFX01;g__JAOAFX01;s__	94.25	3.4	0.178933
4_018	d__Bacteria;p__Synergistota;c__GBS-1;o__GBS-1;f__GBS-1;g__42-11;s__	100	17.34	0.195645
4_019	d__Archaea;p__Thermoproteota;c__EX4484-205;o__EX4484-205;f__JAAOZP01;g__JAAOZP01;s__	47.25	23.3	0.178721
4_020	d__Archaea;p__Thermoproteota;c__EX4484-205;o__EX4484-205;f__JAAOZP01;g__JAAOZP01;s__	34.11	5.61	0.171536
4_021	d__Archaea;p__Thermoproteota;c__EX4484-205;o__EX4484-205;f__JAAOZP01;g__JAAOZP01;s__	56	18.54	0.168915
4_022	d__Bacteria;p__Spirochaetota;c__UBA4802;o__UBA4802;f__UB4802;g__UBA4802;s__	43.97	1.12	0.0946211
4_023	d__Archaea;p__Thermoproteota;c__Nitrososphaeria;o__JACIWG01;f__JACIWG01;g__JACIWG01;s__	70.53	29.36	0.11505
4_024	d__Bacteria;p__Bacillota_B;c__Desulfotomaculia;o__Desulfotomaculales;f__Pelotomaculaceae;g__Pelotomaculum;s__	6.96	0.02	0.146704
4_025	d__Bacteria;p__Bacillota_B;c__Desulfotomaculia;o__Desulfotomaculales;f__Pelotomaculaceae;g__UBA3102;s__	85.13	1.64	0.143452
4_026	d__Bacteria;p__Bipolaricaulota;c__Bipolaricaulia;o__Bipolaricaulales;f__Bipolaricaulaceae;g__DTER01;s__	87.93	11.62	0.133319
4_027	d__Bacteria;p__Chloroflexota;c__Anaerolineae;o__Anaerolineales;f__Anaerolineaceae;g__Thermanaerothrix;s__	9.67	0	0.125228
4_028	d__Bacteria;p__Chloroflexota;c__Anaerolineae;o__Anaerolineales;f__Anaerolineaceae;g__Thermanaerothrix;s__	75.84	17.54	0.105156
4_029	d__Archaea;p__Thermoproteota;c__Methanomethylicia;o__Methanomethylicales;f__Methanomethylicaceae;g__Methanosuratincola;s__	73.04	7.01	0.103838
4_030	d__Archaea;p__Thermoproteota;c__Methanomethylicia;o__Methanomethylicales;f__Methanomethylicaceae;g__WYZ-LMO10;s__	53.9	10.46	0.10036
4_031	d__Bacteria;p__Atribacterota;c__Atribacteria;o__Atribacterales;f__Caldatribacteriaceae;g__JABUEZ01;s__	55.67	2.47	0.0965941
4_032	d__Archaea;p__Thermoproteota;c__Bathyarchaeia;o__B24;f__JAGTQN01;g__JAGTQN01;s__	53.22	1.94	0.09578
4_033	d__Archaea;p__Thermoplasmatota;c__Thermoplasmata;o__Methanomassiliicoccales;f__JACIVX01;g__JACIVX01;s__	25.12	0.81	0.089617
Unmapped				1.41291

## Sheet: Fig. 1b_oleic acid-r2
Bin Id	Classification	Completeness (%)	Contamination (%)	Relative Abundance in metagenome (%)
5_001	d__Archaea;p__Halobacteriota;c__Archaeoglobi;o__Archaeoglobales;f__Archaeoglobaceae;g__WYZ-LMO2;s__WYZ-LMO2 sp030055595	99.35	1.63	74.1765
5_002	d__Archaea;p__Methanobacteriota;c__Methanobacteria;o__Methanobacteriales;f__DSM-23052;g__;s__	100	0.8	4.28065
5_003	d__Bacteria;p__Thermotogota;c__Thermotogae;o__Thermotogales;f__DSM-5069;g__Pseudothermotoga_B;s__	99.84	0	3.79943
5_004	d__Bacteria;p__Bacillota_B;c__Moorellia;o__Moorellales;f__Moorellaceae;g__JASUSV01;s__	97.9	0.85	2.96391
5_005	d__Bacteria;p__Caldisericota;c__Caldisericia;o__B22-G15;f__B22-G15;g__JAAYUH01;s__	90.18	3.57	2.41326
5_006	d__Bacteria;p__Bacillota_B;c__Syntrophomonadia;o__Syntrophomonadales;f__DTU052;g__;s__	97.27	0.84	1.92471
5_007	d__Bacteria;p__Patescibacteria;c__Paceibacteria;o__UBA6257;f__UBA6257;g__;s__	80.3	10.34	1.65712
5_008	d__Bacteria;p__Bacillota_B;c__DSM-12270;o__Thermacetogeniales;f__Thermacetogeniaceae;g__DULK01;s__	98.43	0.63	1.06487
5_009	d__Bacteria;p__Nitrospirota;c__Thermodesulfovibrionia;o__Thermodesulfovibrionales;f__Thermodesulfovibrionaceae;g__Thermodesulfovibrio;s__	99.08	4.59	1.03858
5_010	d__Bacteria;p__Chloroflexota;c__Anaerolineae;o__Anaerolineales;f__Anaerolineaceae;g__Thermanaerothrix;s__	92.73	7.91	0.94789
5_011	d__Bacteria;p__Thermotogota;c__Thermotogae;o__Thermotogales;f__DSM-5069;g__Pseudothermotoga_A;s__	96.55	1.72	0.600051
5_012	d__Archaea;p__Thermoproteota;c__Methanomethylicia;o__Methanomethylicales;f__Methanomethylicaceae;g__Methanosuratincola;s__Methanosuratincola sp030055545	100	0	0.421657
5_013	d__Bacteria;p__DUMJ01;c__DUMJ01;o__DUMJ01;f__DUMJ01;g__DUMJ01;s__	100	3.45	0.306291
5_014	d__Bacteria;p__Bacillota_B;c__Syntrophomonadia;o__Syntrophomonadales;f__Syntrophothermaceae;g__Syntrophothermus;s__	98.81	9.18	0.212337
5_015	Unclassified Bacteria	4.17	0	0.202096
5_016	d__Bacteria;p__Bacillota_E;c__JACIYH01;o__JACIYH01;f__JACIYH01;g__JACIYH01;s__JACIYH01 sp014360055	57.26	0.99	0.192325
5_017	d__Bacteria;p__Bacillota_E;c__JACIYH01;o__JACIYH01;f__JACIYH01;g__JACIYH01;s__	12.34	0.99	0.190784
5_018	d__Bacteria;p__Bacillota_E;c__JACIYH01;o__JACIYH01;f__JACIYH01;g__JACIYH01;s__	24.14	0	0.189923
5_019	d__Bacteria;p__Bacillota_E;c__JACIYH01;o__JACIYH01;f__JACIYH01;g__JACIYH01;s__	54.31	6.9	0.163065
5_020	d__Archaea;p__Thermoproteota;c__Nitrososphaeria;o__JACIWG01;f__JACIWG01;g__JACIWG01;s__	63.35	8.09	0.188019
5_021	d__Bacteria;p__Bacillota_B;c__Desulfotomaculia;o__Desulfotomaculales;f__Pelotomaculaceae;g__UBA3102;s__	87.66	2.9	0.127183
5_022	d__Bacteria;p__Verrucomicrobiota;c__Verrucomicrobiae;o__Limisphaerales;f__J093;g__JAAYVR01;s__	97.64	17.05	0.112785
5_023	d__Bacteria;p__Bipolaricaulota;c__Bipolaricaulia;o__Bipolaricaulales;f__Bipolaricaulaceae;g__DTER01;s__	85.95	9.32	0.106767
5_024	d__Bacteria;p__Planctomycetota;c__Phycisphaerae;o__UBA1845;f__Fen-1342;g__JAAYXS01;s__	94.83	69.35	0.0885785
5_025	d__Archaea;p__Thermoplasmatota;c__Thermoplasmata;o__Methanomassiliicoccales;f__JACIVX01;g__JACIVX01;s__	77.08	1.16	0.0797592
5_026	d__Bacteria;p__Atribacterota;c__Atribacteria;o__Atribacterales;f__Caldatribacteriaceae;g__Caldatribacterium;s__	74.9	2.54	0.0823848
5_027	d__Bacteria;p__Marinisomatota;c__UBA2242;o__;f__;g__;s__	31.82	3.74	0.082332
5_028	d__Bacteria;p__Bacillota_B;c__DSM-12270;o__Thermacetogeniales;f__Thermacetogeniaceae;g__DULK01;s__	44.11	2.61	0.0769439
5_029	d__Bacteria;p__DTU030;c__DTU030;o__DUMP01;f__DUMP01;g__DUMP01;s__	43.57	4.17	0.0808727
5_030	d__Bacteria;p__Bacillota_E;c__DTU015;o__DTU015;f__;g__;s__	78.13	85.61	0.0717671
5_031	d__Archaea;p__Thermoproteota;c__Thermoprotei_A;o__Sulfolobales;f__NBVN01;g__Zestosphaera;s__	72.03	6.33	0.0734779
5_032	d__Bacteria;p__Chloroflexota;c__Chloroflexia;o__DTKN01;f__DTKN01;g__;s__	52.87	11.15	0.0734449
5_033	d__Bacteria;p__Chloroflexota;c__Anaerolineae;o__JACIWP01;f__JACIWP01;g__JACIWP01;s__	30.4	1.61	0.0747902
5_034	d__Bacteria;p__Synergistota;c__GBS-1;o__GBS-1;f__GBS-1;g__42-11;s__	50.38	6.27	0.0684497
Unmapped				1.867

## Sheet: Fig. 2b_oleic acid-r1
Bin Id	Classification	Completeness (%)	Contamination (%)	Relative Abundance in metagenome (%)	Relative Abundance in metatranscriptome (%)	mcrA (FPKM)	mcrB (FPKM)	mcrC (FPKM)	mcrD (FPKM)	mcrG (FPKM)	mtrH (FPKM)	mtrA (FPKM)	mtrB (FPKM)	mtrC (FPKM)	mtrD (FPKM)	mtrE (FPKM)	mtrG (FPKM)	mtrF (FPKM)
6_001	d__Archaea;p__Halobacteriota;c__Archaeoglobi;o__Archaeoglobales;f__Archaeoglobaceae;g__WYZ-LMO2;s__WYZ-LMO2 sp030055595	92.16	1.63	79.1313	87.2946	6811.34	5950.25	2815.86	5660.63	4189.15	2263.39	1719.45	949.556	2263.62	2141	2517.46
6_002	d__Bacteria;p__Nitrospirota;c__Thermodesulfovibrionia;o__Thermodesulfovibrionales;f__Thermodesulfovibrionaceae;g__Thermodesulfovibrio;s__	99.08	0.06	6.14652	1.08128
6_003	d__Bacteria;p__Thermotogota;c__Thermotogae;o__Thermotogales;f__DSM-5069;g__Pseudothermotoga_B;s__	99.84	0	3.923	6.14466
6_004	d__Bacteria;p__Planctomycetota;c__Phycisphaerae;o__UBA1845;f__Fen-1342;g__JAAYXS01;s__	97.73	1.14	3.33438	1.26208
6_005	d__Archaea;p__Methanobacteriota;c__Methanobacteria;o__Methanobacteriales;f__DSM-23052;g__Methanothermobacter_A;s__	96.8	3.84	1.03173	0.582773	164.55	367.505	26.4981	80.6822	64.5101	23.8252	3.88692	0	3.25232	12.3008	11.5064	0	0
						284.222		127.191	124.755	186.363		23.3215	0	13.0093	28.7018	5.78103	0	0
						334.112
						417.64
6_006	d__Archaea;p__Halobacteriota;c__Methanosarcinia;o__Methanotrichales;f__Methanotrichaceae;g__Methanothrix_B;s__Methanothrix_B sp030055635	99.84	0.65	1.01148	0.332637	70.6414	109.67	0	49.3288	21.1233	0	0	0	6.29897	16.6292	13.8497	0	0
6_007	d__Archaea;p__Methanobacteriota;c__Methanobacteria;o__Methanobacteriales;f__DSM-23052;g__Methanothermobacter_A;s__Methanothermobacter_A sp030055615	94.06	3.39	0.681044	0
6_008	d__Archaea;p__Thermoproteota;c__Bathyarchaeia;o__Bathyarchaeales;f__UBA233;g__JAGTQX01;s__JAGTQX01 sp018396675	97.2	22.12	0.258232	0
6_009	d__Archaea;p__Thermoproteota;c__Methanomethylicia;o__Methanomethylicales;f__Methanomethylicaceae;g__WYZ-LMO10;s__WYZ-LMO10 sp029887795	85.05	6.54	0.195773	0	7.61696	9.99494	0		6.37206
										0
										0
6_010	d__Archaea;p__Thermoplasmatota;c__E2;o__UBA202;f__JdFR-43;g__JACIWB01;s__	98.8	12	0.191895	0
6_011	d__Archaea;p__Thermoproteota;c__Nitrososphaeria;o__JACIWG01;f__JACIWG01;g__JACIWG01;s__JACIWG01 sp029776125	76.05	6.63	0.1762	0
6_012	d__Archaea;p__Thermoproteota;c__Methanomethylicia;o__Methanomethylicales;f__Methanomethylicaceae;g__Methanosuratincola;s__Methanosuratincola sp030055545	92.92	14.02	0.152594	0	0	0	0		0
						1.59897	0			0
						0	0			0
										0
6_013	d__Archaea;p__Thermoproteota;c__Thermoprotei_A;o__Sulfolobales;f__NBVN01;g__DTCV01;s__	95.39	1.62	0.127798	0.51804
6_014	d__Archaea;p__Thermoplasmatota;c__Thermoplasmata;o__Methanomassiliicoccales;f__JACIVX01;g__JACIVX01;s__	86.75	2.48	0.105387	0	7.68224	6.70065	0	0	0
6_015	d__Bacteria;p__Planctomycetota;c__Planctomycetia;o__Pirellulales;f__Thermoguttaceae;g__Thermogutta;s__Thermogutta terrifontis	63.45	4.7	0.103792	0
6_016	d__Bacteria;p__Bipolaricaulota;c__Bipolaricaulia;o__Bipolaricaulales;f__Bipolaricaulaceae;g__DTER01;s__	66	3.39	0.105003	0
6_017	d__Archaea;p__Thermoproteota;c__EX4484-205;o__EX4484-205;f__JAAOZP01;g__JAAOZP01;s__	80.85	41.15	0.0937028	0
6_018	d__Bacteria;p__Bacillota_B;c__DSM-12270;o__Thermacetogeniales;f__Thermacetogeniaceae;g__Ch130;s__Ch130 sp013177945	47.24	2.64	0.0913797	0
6_019	d__Bacteria;p__Bacillota_B;c__Syntrophomonadia;o__Syntrophomonadales;f__Syntrophomonadaceae;g__Thermosyntropha;s__	39.19	4.21	0.0768271	0
Unmapped				3.06201	2.78391

## Sheet: Fig. 2b_oleic acid-r2
Bin Id	Classification	Completeness (%)	Contamination (%)	Relative Abundance in metagenome (%)	Relative Abundance in metatranscriptome (%)	mcrA (FPKM)	mcrB (FPKM)	mcrC (FPKM)	mcrD (FPKM)	mcrG (FPKM)	mtrH (FPKM)	mtrA (FPKM)	mtrB (FPKM)	mtrC (FPKM)	mtrD (FPKM)	mtrE (FPKM)	mtrG (FPKM)	mtrF (FPKM)
7_001	d__Archaea;p__Halobacteriota;c__Archaeoglobi;o__Archaeoglobales;f__Archaeoglobaceae;g__WYZ-LMO2;s__WYZ-LMO2 sp030055595	99.35	1.63	74.1548	82.8438	8438.52	7117.32	6017.41	9913.75	7054.59	2926.27	2610.84	1803.84	2699.24	2931.37	3160.13
7_002	d__Bacteria;p__Thermotogota;c__Thermotogae;o__Thermotogales;f__DSM-5069;g__Pseudothermotoga_B;s__	99.84	0	13.0958	6.2638
7_003	d__Bacteria;p__Planctomycetota;c__Phycisphaerae;o__UBA1845;f__Fen-1342;g__JAAYXS01;s__	97.73	1.14	3.97535	1.18793
7_004	d__Archaea;p__Methanobacteriota;c__Methanobacteria;o__Methanobacteriales;f__DSM-23052;g__Methanothermobacter_A;s__Methanothermobacter_A sp030055615	99.2	2.24	1.46084	1.4355	483.001	256.706	127.271	151.996	166.883	29.3554	2.29843	21.5874	13.3721	4.8602	8.41467	0	0
						303.882
7_005	d__Archaea;p__Thermoproteota;c__Nitrososphaeria;o__JACIWG01;f__JACIWG01;g__JACIWG01;s__JACIWG01 sp029776125	99.03	4.85	1.12117	2.37339
7_006	d__Archaea;p__Halobacteriota;c__Methanosarcinia;o__Methanotrichales;f__Methanotrichaceae;g__Methanothrix_B;s__Methanothrix_B sp030055635	99.84	0	1.11448	0.442962	127.719	159.456	8.65327	69.0014	93.3172	4.63506	4.47562	12.7797	9.23941	2.46541	11.331	104.049	0
7_007	d__Archaea;p__Methanobacteriota;c__Methanobacteria;o__Methanobacteriales;f__DSM-23052;g__Methanothermobacter_A;s__	96	2.05	0.657543	0.388381	189.926					23.1753	11.4922	0	1.91029	4.8602	5.07396	0	0
7_008	d__Bacteria;p__Nitrospirota;c__Thermodesulfovibrionia;o__Thermodesulfovibrionales;f__Thermodesulfovibrionaceae;g__Thermodesulfovibrio;s__	99.08	1.2	0.405039	0.150171
7_009	d__Archaea;p__Thermoproteota;c__Methanomethylicia;o__Methanomethylicales;f__Methanomethylicaceae;g__Methanosuratincola;s__Methanosuratincola sp030055575	18.69	0	0.364083	0.782613
7_010	d__Archaea;p__Thermoproteota;c__Methanomethylicia;o__Methanomethylicales;f__Methanomethylicaceae;g__Methanosuratincola;s__	18.69	0	0.319519	0
7_011	d__Archaea;p__Thermoproteota;c__Methanomethylicia;o__Methanomethylicales;f__Methanomethylicaceae;g__Methanosuratincola;s__Methanosuratincola sp030055575	81.31	14.95	0.344324	0.3711	17.5287	14.4349	0	0	14.2547
7_012	d__Archaea;p__Thermoproteota;c__Methanomethylicia;o__Methanomethylicales;f__Methanomethylicaceae;g__Methanosuratincola;s__Methanosuratincola sp030055545	74.77	1.87	0.29206	0	0	0			0
						4.38218	9.62324	2.65852	0	14.2547
7_013	Unclassified Bacteria	1.72	0	0.310304	0
7_014	d__Archaea;p__Thermoproteota;c__Thermoprotei_A;o__Sulfolobales;f__NBVN01;g__Zestosphaera;s__	98.1	1.27	0.215422	0
7_015	d__Archaea;p__Methanobacteriota;c__Methanobacteria;o__Methanobacteriales;f__DSM-23052;g__;s__	99.2	8.66	0.187844	0	40.7251	16.406	12.7271	11.7411	8.61056	4.65626	11.2896	0	0	0	1.65826		0
								2.78961			0
7_016	d__Archaea;p__Thermoproteota;c__Thermoprotei_A;o__Sulfolobales;f__NBVN01;g__DTCV01;s__	98.1	1.42	0.160627	0.895816
7_017	d__Bacteria;p__Chloroflexota;c__Anaerolineae;o__Anaerolineales;f__Anaerolineaceae;g__Thermanaerothrix;s__	37.42	2.91	0.14733	0
7_018	d__Bacteria;p__Chloroflexota;c__Anaerolineae;o__Anaerolineales;f__Anaerolineaceae;g__Thermanaerothrix;s__	63.85	5.45	0.131487	0
7_019	d__Archaea;p__Thermoproteota;c__Bathyarchaeia;o__Bathyarchaeales;f__UBA233;g__JAGTQX01;s__JAGTQX01 sp018396675	86.42	27.41	0.149777	0.296365
7_020	d__Bacteria;p__Planctomycetota;c__Planctomycetia;o__Pirellulales;f__Thermoguttaceae;g__Thermogutta;s__Thermogutta terrifontis	88.86	6.29	0.119654	0
7_021	d__Bacteria;p__DTU030;c__DTU030;o__DUMP01;f__DUMP01;g__DUMP01;s__	91.57	4.08	0.117103	0
7_022	d__Archaea;p__Aenigmatarchaeota;c__Aenigmatarchaeia;o__CG10238-14;f__CG10238-14;g__JAHLMN01;s__JAHLMN01 sp018920345	81.01	9.5	0.115381	0
7_023	d__Bacteria;p__Thermotogota;c__Thermotogae;o__Thermotogales;f__DSM-5069;g__Pseudothermotoga_A;s__	80.56	0.16	0.103169	0.112604
7_024	d__Archaea;p__Thermoproteota;c__Methanomethylicia;o__Methanomethylicales;f__Methanomethylicaceae;g__WYZ-LMO10;s__WYZ-LMO10 sp029887795	89.72	49.32	0.105043	0	61.2219	11.5479		6.93215	12.2183
						5.37748	11.5479			12.2183
							3.0884			0
Unmapped				0.831902	2.4556

## Sheet: Fig. 3b_methanol-r1
Bin Id	Classification	Completeness (%)	Contamination (%)	Relative Abundance in metagenome (%)	Relative Abundance in metatranscriptome (%)	mcrA (FPKM)	mcrB (FPKM)	mcrC (FPKM)	mcrD (FPKM)	mcrG (FPKM)	mtrH (FPKM)	mtrA (FPKM)	mtrB (FPKM)	mtrC (FPKM)	mtrD (FPKM)	mtrE (FPKM)	mtrG (FPKM)	mtrF (FPKM)
8_001	d__Archaea;p__Halobacteriota;c__Archaeoglobi;o__Archaeoglobales;f__Archaeoglobaceae;g__WYZ-LMO2;s__WYZ-LMO2 sp030055595	99.35	1.63	76.2705	93.3769	1034.99	1695.32	722.261	1556.07	587.258	181.693	105.845	55.8604	99.7866	100.359	225.075
8_003	d__Archaea;p__Halobacteriota;c__Methanosarcinia;o__Methanotrichales;f__Methanotrichaceae;g__Methanothrix_B;s__Methanothrix_B sp030055635	99.84	0	3.70884	0	1.89886	7.7715	0	0	0	0	1.16833	0	0	0	0
8_004	d__Bacteria;p__Bipolaricaulota;c__Bipolaricaulia;o__Bipolaricaulales;f__Bipolaricaulaceae;g__DTER01;s__	86.29	2.54	3.30192	0.572047
8_005	Unclassified Bacteria	0	0	2.32609	0.336053
8_006	d__Archaea;p__Thermoplasmatota;c__E2;o__UBA202;f__JdFR-43;g__JACIWB01;s__	98.8	1.6	1.28895	0.181266
8_007	d__Archaea;p__Aenigmatarchaeota;c__Aenigmatarchaeia;o__GW2011-AR5;f__JAHLMP01;g__JAHLMP01;s__JAHLMP01 sp018920315	88.01	22.43	1.00887	0.465902
8_008	d__Archaea;p__Thermoproteota;c__Nitrososphaeria;o__JACIWG01;f__JACIWG01;g__JACIWG01;s__JACIWG01 sp029776125	77.67	9.22	0.97599	0.583945
8_009	Unclassified Bacteria	4.17	4.17	0.99892	0.272189
8_010	d__Archaea;p__Thermoproteota;c__Thermoprotei_A;o__Sulfolobales;f__NBVN01;g__Zestosphaera;s__	98.1	0.63	0.911728	0.639146
8_011	d__Bacteria;p__Thermotogota;c__Thermotogae;o__Thermotogales;f__DSM-5069;g__Pseudothermotoga_B;s__	99.84	0	0.887115	0.231211
8_012	d__Archaea;p__Thermoproteota;c__Bathyarchaeia;o__Bathyarchaeales;f__UBA233;g__JAGTQX01;s__JAGTQX01 sp018396675	99.07	5.14	0.673251	0.300056
8_013	d__Bacteria;p__Planctomycetota;c__Phycisphaerae;o__UBA1845;f__Fen-1342;g__JAAYXS01;s__	97.73	2.27	0.659898	0.138114
8_014	d__Archaea;p__Thermoproteota;c__Methanomethylicia;o__Methanomethylicales;f__Methanomethylicaceae;g__WYZ-LMO10;s__WYZ-LMO10 sp029887795	90.65	4.67	0.648946	0
8_015	d__Archaea;p__Thermoproteota;c__EX4484-205;o__EX4484-205;f__JAAOZP01;g__JAAOZP01;s__	91.26	20.2	0.431954	0	1.59334		0	0	1.10311		0	0	0	0	0
						0
8_016	d__Archaea;p__Methanobacteriota;c__Methanobacteria;o__Methanobacteriales;f__DSM-23052;g__Methanothermobacter_A;s__	99.07	14.33	0.329878	0		0.50486		0
8_017	d__Archaea;p__Thermoproteota;c__Thermoprotei_A;o__Sulfolobales;f__NBVN01;g__DTCV01;s__	98.73	1.9	0.318763	0.282554
8_018	d__Archaea;p__Thermoproteota;c__Nitrososphaeria;o__JACIWG01;f__JACIWG01;g__;s__	12.29	1.94	0.309549	0
8_019	d__Bacteria;p__WOR-3;c__WOR-3;o__UBA2258;f__UBA2258;g__JAOABP01;s__	96.63	0.1	0.205742	0
8_020	d__Archaea;p__Thermoproteota;c__Nitrososphaeria;o__JACIWG01;f__JACIWG01;g__JACIWG01;s__	50.54	10.19	0.18211	0
8_021	d__Archaea;p__Aenigmatarchaeota;c__Aenigmatarchaeia;o__CG10238-14;f__SCSR01;g__;s__	78.19	0	0.161578	0
8_022	d__Bacteria;p__WOR-3;c__WOR-3;o__SM23-42;f__JAOAFX01;g__JAOAFX01;s__	90.59	3.85	0.143792	0
8_023	d__Archaea;p__Methanobacteriota;c__Methanobacteria;o__Methanobacteriales;f__DSM-23052;g__Methanothermobacter_A;s__Methanothermobacter_A sp030055615	82.18	6.57	0.130232	0	0	0					0	0	0	0	0	0	0
8_024	d__Bacteria;p__Bacillota_B;c__Desulfotomaculia;o__Desulfotomaculales;f__Pelotomaculaceae;g__UBA3102;s__	86.97	3.16	0.117782	0
8_025	d__Archaea;p__Aenigmatarchaeota;c__Aenigmatarchaeia;o__CG10238-14;f__CG10238-14;g__JAHLMN01;s__JAHLMN01 sp018920345	67.63	1.87	0.11665	0
8_026	d__Archaea;p__Thermoplasmatota;c__Thermoplasmata;o__Methanomassiliicoccales;f__JACIVX01;g__JACIVX01;s__	86.69	9.47	0.119361	0	0	0	0	0	0	0	0
						4.35111	5.06298	0	3.95103	4.27968
						13.5041		0	0	0
						0
8_027	d__Bacteria;p__Chloroflexota;c__Anaerolineae;o__Anaerolineales;f__Anaerolineaceae;g__Thermanaerothrix;s__	42.78	7.07	0.115905	0
8_028	d__Bacteria;p__Acidobacteriota;c__Aminicenantia;o__Aminicenantales;f__Saccharicenantaceae;g__Saccharicenans;s__	86.03	6.46	0.10768	0
8_029	d__Archaea;p__Hadarchaeota;c__Hadarchaeia;o__Hadarchaeales;f__Hadarchaeaceae;g__Hadarchaeum;s__	58.34	15.07	0.110359	0	0	0			0		0	0	0	0	0
						0
8_030	Unclassified Archaea	32.09	6.07	0.139173	0
8_031	Unclassified Archaea	0	0	0.144433	0.0619455
8_032	d__Archaea;p__Methanobacteriota;c__Methanobacteria;o__Methanobacteriales;f__DSM-23052;g__;s__	87.01	1.6	0.103881	0							0
8_033	d__Archaea;p__Thermoproteota;c__Bathyarchaeia;o__Bathyarchaeales;f__UBA233;g__;s__	41.66	7.48	0.132514	0
8_034	d__Archaea;p__Thermoproteota;c__Bathyarchaeia;o__Bathyarchaeales;f__UBA233;g__DRVP01;s__	26.17	7.48	0.145402	0
8_035	Unclassified Bacteria	0	0	0.112603	0.287964
8_036	Unclassified Archaea	7.01	0	0.105321	0
8_037	Unclassified Archaea	23.52	2.8	0.121184	0
8_038	d__Archaea;p__Thermoproteota;c__Bathyarchaeia;o__Bathyarchaeales;f__UBA233;g__;s__	40.73	24.45	0.121953	0
8_039	d__Archaea;p__Thermoproteota;c__Bathyarchaeia;o__Bathyarchaeales;f__UBA233;g__JAGTQI01;s__	18.86	3.85	0.127575	0
8_040	d__Bacteria;p__Thermotogota;c__Thermotogae;o__Thermotogales;f__DSM-5069;g__Pseudothermotoga_A;s__	70.77	3.09	0.0910174	0
8_041	d__Archaea;p__Thermoproteota;c__Bathyarchaeia;o__Bathyarchaeales;f__UBA233;g__JAGTQI01;s__	27.56	5.3	0.127608	0
8_042	Unclassified Archaea	7.94	0	0.139826	0.0511989
8_043	d__Bacteria;p__Planctomycetota;c__Planctomycetia;o__Pirellulales;f__Thermoguttaceae;g__Thermogutta;s__Thermogutta terrifontis	36.72	2.91	0.0716703	0
Unmapped				1.75344	2.21953

## Sheet: Fig. 3b_methanol-r2
Bin Id	Classification	Completeness (%)	Contamination (%)	Relative Abundance in metagenome (%)	Relative Abundance in metatranscriptome (%)	mcrA (FPKM)	mcrB (FPKM)	mcrC (FPKM)	mcrD (FPKM)	mcrG (FPKM)	mtrH (FPKM)	mtrA (FPKM)	mtrB (FPKM)	mtrC (FPKM)	mtrD (FPKM)	mtrE (FPKM)	mtrG (FPKM)	mtrF (FPKM)
9_001	d__Archaea;p__Halobacteriota;c__Archaeoglobi;o__Archaeoglobales;f__Archaeoglobaceae;g__WYZ-LMO2;s__WYZ-LMO2 sp030055595	99.35	1.63	80.9721	95.4365	1180.56	2017.28	909.825	2328.96	825.894	140.897	98.4717	92.2759	113.432	98.2004	209.409
9_003	d__Archaea;p__Halobacteriota;c__Methanosarcinia;o__Methanotrichales;f__Methanotrichaceae;g__Methanothrix_B;s__Methanothrix_B sp030055635	99.84	0	3.16726	0	4.3219	5.44743	1.17456	0	1.71653	0.646317	0	0	0	0	0.676133	0	0
9_004	d__Bacteria;p__Bipolaricaulota;c__Bipolaricaulia;o__Bipolaricaulales;f__Bipolaricaulaceae;g__DTER01;s__	89.83	0	2.5906	0.337399
9_005	Unclassified	0	0	1.41323	0.123853
9_006	d__Archaea;p__Thermoproteota;c__Thermoprotei_A;o__Sulfolobales;f__NBVN01;g__Zestosphaera;s__	98.1	2.53	1.15986	0.797
9_007	d__Archaea;p__Thermoplasmatota;c__E2;o__UBA202;f__JdFR-43;g__JACIWB01;s__	98	1.6	1.15593	0.119866
9_008	d__Bacteria;p__Planctomycetota;c__Phycisphaerae;o__UBA1845;f__Fen-1342;g__JAAYXS01;s__	97.73	1.14	0.877926	0.100169
9_009	d__Archaea;p__Thermoproteota;c__Nitrososphaeria;o__JACIWG01;f__JACIWG01;g__JACIWG01;s__JACIWG01 sp029776125	82.04	25.24	0.893654	0.239305
9_010	d__Archaea;p__Aenigmatarchaeota;c__Aenigmatarchaeia;o__GW2011-AR5;f__JAHLMP01;g__JAHLMP01;s__JAHLMP01 sp018920315	88.01	16.36	0.845871	0
9_011	d__Bacteria;p__Thermotogota;c__Thermotogae;o__Thermotogales;f__DSM-5069;g__Pseudothermotoga_B;s__	99.84	0	0.710094	0.189807
9_012	d__Archaea;p__Thermoproteota;c__Bathyarchaeia;o__Bathyarchaeales;f__UBA233;g__JAGTQX01;s__JAGTQX01 sp018396675	99.07	4.21	0.687067	0.26168
9_013	Unclassified Bacteria	0	0	0.593749	0.191304
9_014	d__Archaea;p__Thermoproteota;c__Methanomethylicia;o__Methanomethylicales;f__Methanomethylicaceae;g__WYZ-LMO10;s__WYZ-LMO10 sp029887795	90.19	4.21	0.420396	0	1.24268	0.814771	0		0.843446
9_015	d__Archaea;p__Thermoproteota;c__Thermoprotei_A;o__Sulfolobales;f__NBVN01;g__DTCV01;s__	98.73	1.27	0.405092	0.346445
9_016	d__Archaea;p__Thermoproteota;c__EX4484-205;o__EX4484-205;f__JAAOZP01;g__JAAOZP01;s__	90.29	10.9	0.350161	0
9_017	d__Archaea;p__Methanobacteriota;c__Methanobacteria;o__Methanobacteriales;f__DSM-23052;g__Methanothermobacter_A;s__	100	36.78	0.225243	0	0.313998	0.408521	0	0	0	0	0	0	0	0	0	0	0
9_018	d__Archaea;p__Aenigmatarchaeota;c__Aenigmatarchaeia;o__CG10238-14;f__CG10238-14;g__JAHLMN01;s__JAHLMN01 sp018920345	64.58	23.58	0.152003	0
9_019	d__Bacteria;p__WOR-3;c__WOR-3;o__SM23-42;f__JAOAFX01;g__JAOAFX01;s__	88.9	2.2	0.131362	0
9_020	d__Archaea;p__Thermoplasmatota;c__Thermoplasmata;o__Methanomassiliicoccales;f__JACIVX01;g__JACIVX01;s__	94.03	13.31	0.126206	0	8.45983	6.25175	0	2.86622	8.50882	0	0
							0			0
9_021	d__Archaea;p__Thermoproteota;c__Bathyarchaeia;o__Bathyarchaeales;f__UBA233;g__;s__	48.91	28.97	0.133776	0
9_022	d__Archaea;p__Aenigmatarchaeota;c__Aenigmatarchaeia;o__CG10238-14;f__SCSR01;g__;s__	65.43	12.46	0.116252	0
9_023	d__Archaea;p__Thermoproteota;c__Bathyarchaeia;o__Bathyarchaeales;f__UBA233;g__;s__	46.26	5.14	0.134223	0
9_024	d__Bacteria;p__Chloroflexota;c__Anaerolineae;o__Anaerolineales;f__Anaerolineaceae;g__Thermanaerothrix;s__	24.95	4.23	0.113613	0
9_025	d__Archaea;p__Thermoproteota;c__Bathyarchaeia;o__Bathyarchaeales;f__UBA233;g__;s__	30.76	10.83	0.129563	0
9_026	d__Archaea;p__Thermoproteota;c__Bathyarchaeia;o__Bathyarchaeales;f__UBA233;g__;s__	34.27	12.65	0.12735	0
9_027	d__Archaea;p__Thermoproteota;c__Bathyarchaeia;o__Bathyarchaeales;f__UBA233;g__;s__	35.59	13.55	0.122998	0
9_028	d__Bacteria;p__WOR-3;c__WOR-3;o__UBA2258;f__UBA2258;g__JAOABP01;s__	83.67	7.11	0.102238	0
9_029	d__Archaea;p__Thermoproteota;c__Bathyarchaeia;o__Bathyarchaeales;f__UBA233;g__DRVP01;s__	38.08	7.48	0.11397	0
9_030	d__Archaea;p__Thermoproteota;c__Bathyarchaeia;o__Bathyarchaeales;f__UBA233;g__;s__	42.68	19.63	0.112051	0
9_031	d__Bacteria;p__Chloroflexota;c__Anaerolineae;o__Anaerolineales;f__Anaerolineaceae;g__Thermanaerothrix;s__	55.76	4.93	0.100229	0
9_032	d__Archaea;p__Methanobacteriota;c__Methanobacteria;o__Methanobacteriales;f__DSM-23052;g__;s__	68.82	21.52	0.0915316	0							0	0	0	0
Unmapped				1.72442	1.85665
