# Supplementary material for: Direct utilization of long-chain fatty acid for methane production by thermophilic Archaeoglobi
Source: Research Square preprint supplement (doi:10.21203/rs.3.rs-7873196/v1), 2025-10-24
Supplement: Supplementary file 6 [file fe5d903b009b3d19261adcc8.xlsx]

## Sheet: Sheet1
Supplementary Table 1 Formation of methane and carbon dioxide. nd: not determined; r1 and r2 represent two replicates.
data in Fig. 1a
	CH4 (µmol)
	10 days	31 days	62 days	94 days		106 days	129 days	150 days		176 days	216 days	238 days
oleic acid-r1	5.88047	997.928	4170.23	10818.9		40.6064	1025.86	965.225		573.239	2366.45	3607.48
oleic acid-r2	6.21762	1050.3	2403.26	4270.76		51.9569	3781.51	4720.17		845.82	3635.92	5092.66
control-r1	2.28427	47.2369	76.2313	102.248		5.20619	82.4685	37.6283		48.8102	46.6188	62.1836
control-r2	2.0595	12.6796	22.4567	30.9977		2.62141	12.7357	16.5567		30.3235	39.3702	46.2816
data in Fig. 2a
	CH4 (µmol)								13C-CH4 (µmol)							CH4 (µmol)								13C-CH4 (µmol)							CH4 (µmol)
	0 days	4 days	11 days	19 days	27 days	33 days			4 days	11 days	19 days	27 days	33 days			0 days	4 days	11 days	19 days	27 days	33 days			4 days	11 days	19 days	27 days	33 days			0 days	4 days	11 days	19 days
oleic acid-r1	38.7077	399.91	753.913	1240.84	2028.42	2165.51		oleic acid-r1	4.19906	7.90533	12.9858	21.2985	22.6276		oleic acid-r1	31.2805	443.84	746.593	1768.59	3012.71	3159.7		oleic acid-r1	19.0851	34.0246	93.2089	188.295	202.631		oleic acid-r1	43.9593	496.648	941.826	1828.49
oleic acid-r2	30.0201	375.833	804.19	1359.68	2029.72	2488.2		oleic acid-r2	3.94625	8.43046	14.2329	21.312	25.9917		oleic acid-r2	29.8729	423.377	987.865	1713.67	2460.27	2702		oleic acid-r2	19.3907	50.2041	96.497	150.568	171.123		oleic acid-r2	52.6703	474.283	928.763	1867.53
									CH4 (13C atom%)															CH4 (13C atom%)
									4 days	11 days	19 days	27 days	33 days											4 days	11 days	19 days	27 days	33 days
								oleic acid-r1	1.05	1.04857	1.04653	1.05	1.04491										oleic acid-r1	4.3	4.55731	5.27024	6.25	6.41297
								oleic acid-r2	1.05	1.04832	1.04678	1.05	1.0446										oleic acid-r2	4.58	5.08208	5.63102	6.12	6.33322
	CO2 (µmol)								13C-CO2 (µmol)							CO2 (µmol)								13C-CO2 (µmol)							CO2 (µmol)
	0 days	4 days	11 days	19 days	27 days	33 days			4 days	11 days	19 days	27 days	33 days			0 days	4 days	11 days	19 days	27 days	33 days			4 days	11 days	19 days	27 days	33 days			0 days	4 days	11 days	19 days
oleic acid-r1	112.986	279.233	503.962	614.494	1058.57	953.736		oleic acid-r1	3.12741	5.63598	6.87079	11.856	10.6642		oleic acid-r1	114.619	329.954	523.679	833.918	1552.37	1454.71		oleic acid-r1	8.44683	17.5848	41.8834	103.543	94.9905		oleic acid-r1	239.444	482.865	665.605	973.149
oleic acid-r2	108.007	250.352	513.585	701.682	1059.12	1131.38		oleic acid-r2	2.80395	5.7408	7.8529	11.8622	12.6556		oleic acid-r2	123.873	390.755	679.259	901.198	1397.22	1394.09		oleic acid-r2	9.29997	26.1227	46.0493	85.2305	93.1978		oleic acid-r2	295.437	480.982	713.011	990.508
									CO2 (13C atom%)															CO2 (13C atom%)
									4 days	11 days	19 days	27 days	33 days											4 days	11 days	19 days	27 days	33 days
								oleic acid-r1	1.12	1.11833	1.11812	1.12	1.11815										oleic acid-r1	2.56	3.35794	5.02248	6.67	6.52985
								oleic acid-r2	1.12	1.11779	1.11915	1.12	1.1186										oleic acid-r2	2.38	3.84577	5.10978	6.1	6.68521
data in Fig. 3a
	CH4 (µmol)										13C-CH4 (µmol)										CH4 (µmol)										13C-CH4 (µmol)										CH4 (µmol)
	6 days	9 days	13 days	16 days	20 days	23 days	27 days	30 days			6 days	9 days	13 days	16 days	20 days	23 days	27 days	30 days			6 days	9 days	13 days	16 days	20 days	23 days	27 days	30 days			6 days	9 days	13 days	16 days	20 days	23 days	27 days	30 days			3 days	7 days	16 days
methanol-r1	148.809	261.892	387.303	545.98	745.716	978.878	1223.78	1188.68		methanol-r1	1.54761	2.78492	4.06669	5.6236	7.67465	9.98456	12.4825	12.113		methanol-r1	160.492	293.529	419.95	611.661	816.025	1020.48	1279.21	1249.48		methanol-r1	11.538	24.0107	36.2417	53.8874	73.1159	91.8431	116.536	111.328		methanol-r1	101.159	164.583	328.598
methanol-r2	163.337	292.694	454.592	636.882	924.185	1201.19	1325.05	1297.61		methanol-r2	1.6987	3.0898	4.72776	6.55989	9.48213	12.3723	13.648	13.2361		methanol-r2	166.191	289.239	429.869	566.007	782.956	998.441	1263.23	1236.19		methanol-r2	12.054	23.7755	37.0547	49.9218	69.7613	91.1577	115.459	114.595		methanol-r2	106.891	154.343	333.652
											CH4 (13C atom%)																				CH4 (13C atom%)
											6 days	9 days	13 days	16 days	20 days	23 days	27 days	30 days													6 days	9 days	13 days	16 days	20 days	23 days	27 days	30 days
											1.04	1.06339	1.05	1.03	1.02917	1.02	1.02	1.01903												methanol-r1	7.18916	8.18	8.63	8.81	8.96	9	9.11	8.91
											1.04	1.05564	1.04	1.03	1.026	1.03	1.03	1.02004												methanol-r2	7.25311	8.22	8.62	8.82	8.91	9.13	9.14	9.27
	CO2 (µmol)										13C-CO2 (µmol)										CO2 (µmol)										13C-CO2 (µmol)										CO2 (µmol)
	6 days	9 days	13 days	16 days	20 days	23 days	27 days	30 days			6 days	9 days	13 days	16 days	20 days	23 days	27 days	30 days			6 days	9 days	13 days	16 days	20 days	23 days	27 days	30 days			6 days	9 days	13 days	16 days	20 days	23 days	27 days	30 days			3 days	7 days	16 days
methanol-r1	241.605	220.667	218.811	315.576	357.74	481.688	575.855	555.347		methanol-r1	2.77845	2.54658	2.51632	3.59757	4.05027	5.44308	6.50716	6.27807		methanol-r1	272.499	246.313	237.463	341.782	380.461	503.353	637.116	619.211		methanol-r1	5.99319	8.20221	10.2109	17.5334	22.4472	34.5804	49.0579	46.8742		methanol-r1	158.53	169.384	216.789
methanol-r2	285.143	243.461	259.011	356.007	429.631	564.229	646.061	608.65		methanol-r2	3.27915	2.81681	2.97862	4.09408	4.92523	6.48863	7.3651	6.92601		methanol-r2	276.17	239.717	248.921	325.157	385.58	487.108	613.551	576.772		methanol-r2	6.27199	7.93463	10.8779	16.2904	21.7853	34.8769	48.2251	44.6998		methanol-r2	173.786	164.749	226.3
											CO2 (13C atom%)																				CO2 (13C atom%)
											6 days	9 days	13 days	16 days	20 days	23 days	27 days	30 days													6 days	9 days	13 days	16 days	20 days	23 days	27 days	30 days
										methanol-r1	1.15	1.15404	1.15	1.14	1.13218	1.13	1.13	1.13048												methanol-r1	2.19934	3.33	4.3	5.13	5.9	6.87	7.7	7.57
										methanol-r2	1.15	1.15699	1.15	1.15	1.14639	1.15	1.14	1.13793												methanol-r2	2.27106	3.31	4.37	5.01	5.65	7.16	7.86	7.75
